# Supplementary material for: Microparticles from Wheat-Gluten Proteins Soluble in Ethanol by Nanoprecipitation: Preparation, Characterization, and Their Study as a Prolonged-Release Fertilizer
Source: Hindawi journal article supplement (doi:10.1155/2018/1042798), 2018-10-11
Supplement: f1 [file 1042798.f1.xlsx]

## Sheet: Hoja1
Solución 0.5%						Solución 0.5% Repetición					Solución 1%					Solución 1% Repetición					Solución 2%					Solución 2% Repetición
Meas. Pts.	Shear Rate	Shear Stress	Viscosity			Shear Rate	Shear Stress	Viscosity			Shear Rate	Shear Stress	Viscosity			Shear Rate	Shear Stress	Viscosity			Shear Rate	Shear Stress	Viscosity			Shear Rate	Shear Stress	Viscosity
	[1/s]	[Pa]	[Pa·s]			[1/s]	[Pa]	[Pa·s]			[1/s]	[Pa]	[Pa·s]			[1/s]	[Pa]	[Pa·s]			[1/s]	[Pa]	[Pa·s]			[1/s]	[Pa]	[Pa·s]
1	0.1	4.78e-05	0.000478	1000		0.1	-0.00114	-0.0114	1000		0.1	-0.000592	-0.00591	1000		0.1	-0.00146	-0.0146	1000		0.1	-0.00112	-0.0112	1000		0.1	0.00115	0.0115	1000
2	10.2	0.0218	0.00213	1000		10.2	0.0229	0.00225	1000		10.2	0.0266	0.00261	1000		10.2	0.027	0.00264	1000		10.2	0.0316	0.00309	1000		10.2	0.0301	0.00295	1000
3	20.3	0.0487	0.0024	1000		20.3	0.0499	0.00246	1000		20.3	0.0528	0.0026	1000		20.3	0.0538	0.00265	1000		20.3	0.0636	0.00313	1000		20.3	0.0643	0.00317	1000
4	30.4	0.0681	0.00224	1000		30.4	0.0712	0.00234	1000		30.4	0.0802	0.00264	1000		30.4	0.0812	0.00267	1000		30.4	0.0949	0.00312	1000		30.4	0.0907	0.00298	1000
5	40.5	0.0906	0.00224	1000		40.5	0.0942	0.00233	1000		40.5	0.107	0.00264	1000		40.5	0.108	0.00267	1000		40.5	0.126	0.00311	1000		40.5	0.122	0.003	1000
6	50.6	0.123	0.00242	1000		50.6	0.128	0.00253	1000		50.6	0.137	0.00272	1000		50.6	0.14	0.00276	1000		50.6	0.164	0.00324	1000		50.6	0.159	0.00314	1000
7	60.7	0.146	0.00241	1000		60.7	0.146	0.0024	1000		60.7	0.153	0.00252	1000		60.7	0.156	0.00256	1000		60.7	0.185	0.00304	1000		60.7	0.196	0.00323	1000
8	70.8	0.176	0.00249	1000		70.8	0.178	0.00252	1000		70.8	0.187	0.00264	1000		70.8	0.19	0.00268	1000		70.8	0.225	0.00317	1000		70.8	0.231	0.00326	1000
9	80.9	0.198	0.00245	1000		80.9	0.201	0.00248	1000		80.9	0.216	0.00267	1000		80.9	0.219	0.0027	1000		80.9	0.257	0.00318	1000		80.9	0.261	0.00323	1000
10	91	0.226	0.00249	1000		91	0.233	0.00256	1000		91	0.251	0.00276	1000		91	0.255	0.0028	1000		91	0.298	0.00328	1000		91	0.295	0.00324	1000
11	101	0.251	0.00248	1000		101	0.248	0.00245	1000		101	0.261	0.00258	1000		101	0.264	0.00262	1000		101	0.313	0.0031	1000		101	0.336	0.00332	1000
12	111	0.296	0.00266	1000		111	0.295	0.00265	1000		111	0.296	0.00266	1000		111	0.302	0.00271	1000		111	0.36	0.00324	1000		111	0.384	0.00346	1000
13	121	0.323	0.00266	1000		121	0.321	0.00265	1000		121	0.322	0.00265	1000		121	0.327	0.0027	1000		121	0.391	0.00323	1000		121	0.422	0.00348	1000
14	131	0.322	0.00245	1000		131	0.322	0.00245	1000		131	0.348	0.00265	1000		131	0.353	0.00268	1000		131	0.414	0.00315	1000		131	0.434	0.0033	1000
15	141	0.372	0.00263	1000		141	0.379	0.00268	1000		142	0.397	0.0028	1000		141	0.403	0.00284	1000		141	0.474	0.00335	1000		141	0.481	0.0034	1000
16	152	0.388	0.00256	1000		152	0.396	0.00261	1000		152	0.425	0.0028	1000		152	0.431	0.00284	1000		152	0.505	0.00333	1000		152	0.507	0.00335	1000
17	162	0.415	0.00257	1000		162	0.419	0.00259	1000		162	0.445	0.00275	1000		162	0.451	0.00279	1000		162	0.53	0.00328	1000		162	0.548	0.00339	1000
18	172	0.433	0.00252	1000		172	0.446	0.0026	1000		172	0.492	0.00287	1000		172	0.498	0.0029	1000		172	0.579	0.00337	1000		172	0.568	0.0033	1000
19	182	0.482	0.00265	1000		182	0.476	0.00262	1000		182	0.488	0.00268	1000		182	0.495	0.00272	1000		182	0.588	0.00323	1000		182	0.638	0.00351	1000
20	192	0.531	0.00277	1000		192	0.531	0.00277	1000		192	0.535	0.00278	1000		192	0.543	0.00283	1000		192	0.646	0.00337	1000		192	0.686	0.00357	1000
21	202	0.551	0.00272	1000		202	0.544	0.00269	1000		202	0.55	0.00272	1000		202	0.559	0.00276	1000		202	0.665	0.00329	1000		202	0.722	0.00357	1000
22	212	0.535	0.00252	1000		212	0.546	0.00257	1000		212	0.606	0.00285	1000		212	0.612	0.00289	1000		212	0.71	0.00335	1000		212	0.709	0.00334	1000
23	222	0.601	0.00271	1000		222	0.603	0.00271	1000		222	0.626	0.00281	1000		222	0.635	0.00286	1000		222	0.748	0.00337	1000		222	0.785	0.00353	1000
24	232	0.622	0.00267	1000		232	0.63	0.00271	1000		232	0.668	0.00288	1000		232	0.677	0.00291	1000		232	0.793	0.00341	1000		232	0.809	0.00348	1000
25	243	0.641	0.00264	1000		242	0.655	0.0027	1000		242	0.709	0.00292	1000		242	0.718	0.00296	1000		242	0.836	0.00345	1000		243	0.834	0.00344	1000
26	253	0.703	0.00278	1000		253	0.708	0.0028	1000		253	0.728	0.00288	1000		253	0.738	0.00292	1000		253	0.871	0.00345	1000		253	0.907	0.00359	1000
27	263	0.693	0.00264	1000		263	0.721	0.00274	1000		263	0.797	0.00303	1000		263	0.805	0.00306	1000		263	0.931	0.00354	1000		263	0.895	0.00341	1000
28	273	0.707	0.00259	1000		273	0.732	0.00268	1000		273	0.82	0.00301	1000		273	0.827	0.00303	1000		273	0.954	0.0035	1000		273	0.923	0.00338	1000
29	283	0.773	0.00273	1000		283	0.801	0.00283	1000		283	0.868	0.00307	1000		283	0.878	0.0031	1000		283	1.02	0.0036	1000		283	0.986	0.00348	1000
30	293	0.813	0.00277	1000		293	0.809	0.00276	1000		293	0.838	0.00286	1000		293	0.849	0.0029	1000		293	0.999	0.00341	1000		293	1.06	0.00362	1000
31	303	0.844	0.00278	1000		303	0.859	0.00283	1000		303	0.908	0.003	1000		303	0.919	0.00303	1000		303	1.07	0.00354	1000		303	1.08	0.00358	1000
32	313	0.865	0.00276	1000		313	0.876	0.0028	1000		313	0.931	0.00297	1000		313	0.942	0.00301	1000		313	1.1	0.00351	1000		313	1.12	0.00357	1000
33	323	0.881	0.00273	1000		323	0.896	0.00277	1000		323	0.971	0.003	1000		323	0.981	0.00303	1000		323	1.14	0.00352	1000		323	1.14	0.00353	1000
34	333	0.971	0.00291	1000		333	0.973	0.00292	1000		333	1	0.003	1000		333	1.01	0.00304	1000		333	1.19	0.00356	1000		333	1.23	0.00368	1000
35	343	1.02	0.00297	1000		343	1.02	0.00297	1000		343	1.08	0.00314	1000		343	1.09	0.00317	1000		343	1.25	0.00365	1000		343	1.21	0.00354	1000
36	354	1.11	0.00313	1000		354	1.12	0.00317	1000		354	1.12	0.00316	1000		354	1.13	0.00318	1000		354	1.29	0.00366	1000		354	1.25	0.00353	1000
37	364	1.24	0.00341	1000		364	1.23	0.00339	1000		364	1.15	0.00316	1000		364	1.14	0.00314	1000		364	1.32	0.00363	1000		364	1.35	0.0037	1000
38	374	1.26	0.00336	1000		374	1.25	0.00334	1000		374	1.23	0.0033	1000		374	1.2	0.00321	1000		374	1.32	0.00354	1000		374	1.34	0.0036	1000
39	384	1.37	0.00356	1000		384	1.36	0.00354	1000		384	1.32	0.00344	1000		384	1.31	0.0034	1000		384	1.37	0.00357	1000		384	1.41	0.00368	1000
40	394	1.35	0.00343	1000		394	1.38	0.00351	1000		394	1.43	0.00362	1000		394	1.41	0.00359	1000		394	1.43	0.00362	1000		394	1.44	0.00366	1000
41	404	1.42	0.00352	1000		404	1.42	0.00352	1000		404	1.51	0.00373	1000		404	1.5	0.00371	1000		404	1.47	0.00364	1000		404	1.51	0.00373	1000
42	414	1.41	0.00341	1000		414	1.43	0.00345	1000		414	1.56	0.00377	1000		414	1.59	0.00385	1000		414	1.5	0.00363	1000		414	1.5	0.00361	1000
43	424	1.48	0.0035	1000		424	1.48	0.00348	1000		424	1.55	0.00364	1000		424	1.58	0.00371	1000		424	1.51	0.00356	1000		424	1.58	0.00371	1000
44	434	1.53	0.00353	1000		434	1.52	0.0035	1000		434	1.62	0.00372	1000		434	1.6	0.00369	1000		434	1.58	0.00363	1000		434	1.61	0.0037	1000
45	444	1.61	0.00362	1000		444	1.64	0.00369	1000		444	1.73	0.0039	1000		444	1.72	0.00387	1000		444	1.77	0.00398	1000		444	1.66	0.00374	1000
46	455	1.68	0.00371	1000		455	1.68	0.0037	1000		455	1.74	0.00382	1000		455	1.72	0.00379	1000		455	1.83	0.00402	1000		455	1.84	0.00405	1000
47	465	1.75	0.00377	1000		465	1.76	0.00378	1000		465	1.81	0.00389	1000		465	1.81	0.00389	1000		465	1.96	0.00421	1000		465	1.95	0.0042	1000
48	475	1.82	0.00384	1000		475	1.82	0.00383	1000		475	1.88	0.00395	1000		475	1.87	0.00394	1000		475	2.07	0.00436	1000		475	2.04	0.0043	1000
49	485	1.92	0.00396	1000		485	1.93	0.00398	1000		485	1.93	0.00398	1000		485	1.92	0.00395	1000		485	2.17	0.00448	1000		485	2.19	0.00451	1000
50	495	1.94	0.00392	1000		495	1.97	0.00397	1000		495	2.03	0.0041	1000		495	2.04	0.00412	1000		495	2.26	0.00457	1000		495	2.23	0.00451	1000
51	505	1.96	0.00388	1000		505	1.99	0.00395	1000		505	2.07	0.0041	1000		505	2.08	0.00412	1000		505	2.21	0.00438	1000		505	2.29	0.00453	1000
52	515	2.01	0.00391	1000		515	2.1	0.00407	1000		515	2.16	0.00419	1000		515	2.15	0.00418	1000		515	2.31	0.00449	1000		515	2.28	0.00442	1000
53	525	2.15	0.00408	1000		525	2.19	0.00418	1000		525	2.18	0.00415	1000		525	2.22	0.00423	1000		525	2.37	0.00451	1000		525	2.42	0.0046	1000
54	535	2.17	0.00404	1000		535	2.22	0.00414	1000		535	2.3	0.0043	1000		535	2.31	0.00431	1000		535	2.44	0.00455	1000		535	2.43	0.00455	1000
55	545	2.29	0.0042	1000		545	2.29	0.00419	1000		545	2.38	0.00437	1000		545	2.41	0.00442	1000		546	2.49	0.00457	1000		546	2.54	0.00466	1000
56	556	2.33	0.00419	1000		556	2.35	0.00423	1000		556	2.44	0.00439	1000		556	2.43	0.00438	1000		556	2.57	0.00462	1000		556	2.63	0.00473	1000
57	566	2.37	0.00419	1000		566	2.43	0.0043	1000		566	2.48	0.00439	1000		566	2.53	0.00447	1000		566	2.67	0.00472	1000		566	2.65	0.00469	1000
58	576	2.45	0.00425	1000		576	2.46	0.00428	1000		576	2.49	0.00433	1000		576	2.54	0.00441	1000		576	2.67	0.00464	1000		576	2.76	0.00479	1000
59	586	2.56	0.00436	1000		586	2.55	0.00435	1000		586	2.56	0.00438	1000		586	2.61	0.00445	1000		586	2.77	0.00473	1000		586	2.86	0.00489	1000
60	596	2.59	0.00434	1000		596	2.58	0.00433	1000		596	2.67	0.00448	1000		596	2.68	0.0045	1000		596	2.9	0.00487	1000		596	2.87	0.00482	1000
61	606	2.73	0.00451	1000		606	2.76	0.00456	1000		606	2.79	0.0046	1000		606	2.86	0.00471	1000		606	3.06	0.00505	1000		606	2.97	0.0049	1000
62	616	2.78	0.00451	1000		616	2.73	0.00443	1000		616	2.85	0.00462	1000		616	2.87	0.00466	1000		616	3.12	0.00507	1000		616	3.09	0.00501	1000
63	626	2.88	0.0046	1000		626	2.83	0.00453	1000		626	2.94	0.00469	1000		626	2.93	0.00469	1000		626	3.23	0.00515	1000		626	3.23	0.00516	1000
64	636	2.99	0.0047	1000		636	2.94	0.00461	1000		636	2.96	0.00465	1000		636	2.99	0.00469	1000		636	3.25	0.00511	1000		636	3.32	0.00522	1000
65	647	3.05	0.00472	1000		647	3.03	0.00469	1000		647	3.09	0.00477	1000		646	3.12	0.00483	1000		647	3.39	0.00524	1000		647	3.33	0.00516	1000
66	657	3.09	0.00471	1000		657	3.04	0.00463	1000		657	3.14	0.00478	1000		657	3.18	0.00485	1000		657	3.42	0.00522	1000		657	3.39	0.00517	1000
67	667	3.14	0.0047	1000		667	3.12	0.00468	1000		667	3.27	0.0049	1000		667	3.27	0.0049	1000		667	3.47	0.00521	1000		667	3.52	0.00528	1000
68	677	3.33	0.00492	1000		677	3.32	0.0049	1000		677	3.38	0.005	1000		677	3.4	0.00502	1000		677	3.58	0.00529	1000		677	3.61	0.00533	1000
69	687	3.37	0.0049	1000		687	3.34	0.00487	1000		687	3.39	0.00494	1000		687	3.44	0.00501	1000		687	3.6	0.00523	1000		687	3.72	0.00542	1000
70	697	3.5	0.00502	1000		697	3.45	0.00495	1000		697	3.48	0.00499	1000		697	3.53	0.00506	1000		697	3.69	0.0053	1000		697	3.8	0.00545	1000
71	707	3.57	0.00505	1000		707	3.52	0.00497	1000		707	3.6	0.00509	1000		707	3.65	0.00516	1000		707	3.8	0.00538	1000		707	3.84	0.00543	1000
72	717	3.66	0.00511	1000		717	3.63	0.00506	1000		717	3.67	0.00512	1000		717	3.77	0.00525	1000		717	3.99	0.00557	1000		717	3.98	0.00554	1000
73	727	3.68	0.00506	1000		727	3.64	0.00501	1000		727	3.79	0.00521	1000		727	3.81	0.00523	1000		727	4	0.0055	1000		727	3.99	0.00549	1000
74	737	3.81	0.00517	1000		737	3.81	0.00516	1000		737	3.84	0.0052	1000		737	3.93	0.00533	1000		737	4.07	0.00551	1000		737	4.13	0.0056	1000
75	747	3.88	0.00519	1000		747	3.88	0.00519	1000		747	3.93	0.00525	1000		747	3.99	0.00534	1000		747	4.16	0.00556	1000		747	4.21	0.00563	1000
76	758	3.97	0.00524	1000		758	4	0.00528	1000		758	4.09	0.0054	1000		758	4.13	0.00545	1000		758	4.32	0.0057	1000		758	4.29	0.00566	1000
77	768	4.1	0.00534	1000		768	4.08	0.00531	1000		768	4.05	0.00528	1000		768	4.25	0.00553	1000		768	4.39	0.00571	1000		768	4.46	0.00581	1000
78	778	4.2	0.0054	1000		778	4.18	0.00537	1000		778	4.18	0.00538	1000		778	4.27	0.00549	1000		778	4.5	0.00579	1000		778	4.51	0.00579	1000
79	788	4.26	0.0054	1000		788	4.26	0.00541	1000		788	4.37	0.00555	1000		788	4.42	0.00561	1000		788	4.67	0.00593	1000		788	4.63	0.00587	1000
80	798	4.35	0.00545	1000		798	4.37	0.00547	1000		798	4.47	0.00561	1000		798	4.47	0.0056	1000		798	4.75	0.00596	1000		798	4.78	0.006	1000
81	808	4.37	0.00541	1000		808	4.44	0.0055	1000		808	4.61	0.00571	1000		808	4.63	0.00572	1000		808	4.9	0.00606	1000		808	4.83	0.00598	1000
82	818	4.38	0.00536	1000		818	4.5	0.0055	1000		818	4.69	0.00573	1000		818	4.7	0.00575	1000		818	4.92	0.00601	1000		818	4.97	0.00608	1000
83	828	4.5	0.00544	1000		828	4.63	0.00559	1000		828	4.8	0.0058	1000		828	4.87	0.00588	1000		828	5.13	0.0062	1000		828	5.07	0.00612	1000
84	838	4.65	0.00554	1000		838	4.71	0.00562	1000		838	4.83	0.00576	1000		838	4.99	0.00596	1000		838	5.13	0.00611	1000		838	5.25	0.00627	1000
85	848	4.76	0.00561	1000		848	4.81	0.00567	1000		848	4.96	0.00585	1000		848	5.13	0.00605	1000		848	5.29	0.00624	1000		848	5.3	0.00625	1000
86	859	4.85	0.00565	1000		859	4.86	0.00567	1000		859	5.04	0.00587	1000		859	5.21	0.00606	1000		859	5.42	0.00632	1000		859	5.35	0.00623	1000
87	869	4.93	0.00567	1000		869	4.96	0.00571	1000		869	5.12	0.0059	1000		869	5.29	0.00609	1000		869	5.42	0.00624	1000		869	5.53	0.00637	1000
88	879	5.01	0.0057	1000		879	5.09	0.00579	1000		879	5.26	0.00599	1000		879	5.43	0.00618	1000		879	5.66	0.00644	1000		879	5.66	0.00644	1000
89	889	5.07	0.0057	1000		889	5.11	0.00575	1000		889	5.33	0.006	1000		889	5.5	0.00619	1000		889	5.68	0.00639	1000		889	5.66	0.00637	1000
90	899	5.15	0.00573	1000		899	5.21	0.00579	1000		899	5.41	0.00602	1000		899	5.58	0.00621	1000		899	5.81	0.00646	1000		899	5.86	0.00652	1000
91	909	5.29	0.00582	1000		909	5.33	0.00587	1000		909	5.56	0.00611	1000		909	5.74	0.00631	1000		909	5.95	0.00655	1000		909	5.96	0.00655	1000
92	919	5.43	0.00591	1000		919	5.42	0.00589	1000		919	5.6	0.00609	1000		919	5.79	0.0063	1000		919	6.08	0.00662	1000		919	6.14	0.00668	1000
93	929	5.51	0.00593	1000		929	5.55	0.00597	1000		929	5.74	0.00617	1000		929	5.92	0.00638	1000		929	6.19	0.00666	1000		929	6.27	0.00674	1000
94	939	5.61	0.00597	1000		939	5.57	0.00593	1000		939	5.81	0.00618	1000		939	6.01	0.0064	1000		939	6.34	0.00675	1000		939	6.38	0.00679	1000
95	950	5.66	0.00596	1000		949	5.62	0.00592	1000		949	5.94	0.00625	1000		949	6.12	0.00645	1000		949	6.46	0.00681	1000		950	6.39	0.00673	1000
96	960	5.82	0.00607	1000		960	5.74	0.00598	1000		960	5.97	0.00623	1000		960	6.19	0.00645	1000		960	6.44	0.00671	1000		960	6.65	0.00693	1000
97	970	5.9	0.00609	1000		970	5.9	0.00609	1000		970	6.06	0.00625	1000		970	6.36	0.00656	1000		970	6.64	0.00685	1000		970	6.64	0.00685	1000
98	980	5.98	0.0061	1000		980	5.97	0.00609	1000		980	6.17	0.00629	1000		980	6.46	0.0066	1000		980	6.79	0.00693	1000		980	6.81	0.00695	1000
99	990	6.09	0.00615	1000		990	6	0.00607	1000		990	6.27	0.00634	1000		990	6.5	0.00657	1000		990	6.82	0.00689	1000		990	6.98	0.00705	1000
100	1000	6.17	0.00617	1000		1000	6.22	0.00622	1000		1000	6.42	0.00642	1000		1000	6.67	0.00667	1000		1000	6.98	0.00698	1000		1000	6.99	0.00699	1000

## Sheet: PAGE 2
Solution 0.5%							Solution 0.5%			Solution 1%						Solution 1%			Solution 2%
Shear Rate	Shear Stress	Shear Stress	Shear stress Average	SD	Viscosity	Viscosity	Viscosity Average	SD		Shear Stress	Shear Stress	Shear Stress Average	SD	Viscosity	Viscosity	Viscosity Average	SD		Shear Stress	Shear Stress	Shear Stress Average	SD	Viscosity	Viscosity	Viscosity Average	SD
[1/s]	[Pa]	[Pa]	[Pa]		[mPa·s]	[mPa·s]	[mPa·s]			[Pa]	[Pa]	[Pa]		[mPa·s]	[mPa·s]	[mPa·s]			[Pa]	[Pa]	[Pa]		[mPa·s]	[mPa·s]	[mPa·s]
0.1	4.78e-05	-0.00114	-0.0005461	0.000839901	0.478	-11.4	-5.461	8.39901		-0.000592	-0.00146	-0.001026	0.000613769	-5.91	-14.6	-10.255	6.14476		-0.00112	0.00115	1.5e-05	0.00160513	-11.2	11.5	0.15	16.0513
10.2	0.0218	0.0229	0.02235	0.000777817	2.13	2.25	2.19	0.0848528		0.0266	0.027	0.0268	0.000282843	2.61	2.64	2.625	0.0212132		0.0316	0.0301	0.03085	0.00106066	3.09	2.95	3.02	0.0989949
20.3	0.0487	0.0499	0.0493	0.000848528	2.4	2.46	2.43	0.0424264		0.0528	0.0538	0.0533	0.000707107	2.6	2.65	2.625	0.0353553		0.0636	0.0643	0.06395	0.000494975	3.13	3.17	3.15	0.0282843
30.4	0.0681	0.0712	0.06965	0.00219203	2.24	2.34	2.29	0.0707107		0.0802	0.0812	0.0807	0.000707107	2.64	2.67	2.655	0.0212132		0.0949	0.0907	0.0928	0.00296985	3.12	2.98	3.05	0.0989949
40.5	0.0906	0.0942	0.0924	0.00254558	2.24	2.33	2.285	0.0636396		0.107	0.108	0.1075	0.000707107	2.64	2.67	2.655	0.0212132		0.126	0.122	0.124	0.00282843	3.11	3	3.055	0.0777817
50.6	0.123	0.128	0.1255	0.00353553	2.42	2.53	2.475	0.0777817		0.137	0.14	0.1385	0.00212132	2.72	2.76	2.74	0.0282843		0.164	0.159	0.1615	0.00353553	3.24	3.14	3.19	0.0707107
60.7	0.146	0.146	0.146	0	2.41	2.4	2.405	0.00707107		0.153	0.156	0.1545	0.00212132	2.52	2.56	2.54	0.0282843		0.185	0.196	0.1905	0.00777817	3.04	3.23	3.135	0.13435
70.8	0.176	0.178	0.177	0.00141421	2.49	2.52	2.505	0.0212132		0.187	0.19	0.1885	0.00212132	2.64	2.68	2.66	0.0282843		0.225	0.231	0.228	0.00424264	3.17	3.26	3.215	0.0636396
80.9	0.198	0.201	0.1995	0.00212132	2.45	2.48	2.465	0.0212132		0.216	0.219	0.2175	0.00212132	2.67	2.7	2.685	0.0212132		0.257	0.261	0.259	0.00282843	3.18	3.23	3.205	0.0353553
91	0.226	0.233	0.2295	0.00494975	2.49	2.56	2.525	0.0494975		0.251	0.255	0.253	0.00282843	2.76	2.8	2.78	0.0282843		0.298	0.295	0.2965	0.00212132	3.28	3.24	3.26	0.0282843
101	0.251	0.248	0.2495	0.00212132	2.48	2.45	2.465	0.0212132		0.261	0.264	0.2625	0.00212132	2.58	2.62	2.6	0.0282843		0.313	0.336	0.3245	0.0162635	3.1	3.32	3.21	0.155563
111	0.296	0.295	0.2955	0.000707107	2.66	2.65	2.655	0.00707107		0.296	0.302	0.299	0.00424264	2.66	2.71	2.685	0.0353553		0.36	0.384	0.372	0.0169706	3.24	3.46	3.35	0.155563
121	0.323	0.321	0.322	0.00141421	2.66	2.65	2.655	0.00707107		0.322	0.327	0.3245	0.00353553	2.65	2.7	2.675	0.0353553		0.391	0.422	0.4065	0.0219203	3.23	3.48	3.355	0.176777
131	0.322	0.322	0.322	0	2.45	2.45	2.45	0		0.348	0.353	0.3505	0.00353553	2.65	2.68	2.665	0.0212132		0.414	0.434	0.424	0.0141421	3.15	3.3	3.225	0.106066
141	0.372	0.379	0.3755	0.00494975	2.63	2.68	2.655	0.0353553		0.397	0.403	0.4	0.00424264	2.8	2.84	2.82	0.0282843		0.474	0.481	0.4775	0.00494975	3.35	3.4	3.375	0.0353553
152	0.388	0.396	0.392	0.00565685	2.56	2.61	2.585	0.0353553		0.425	0.431	0.428	0.00424264	2.8	2.84	2.82	0.0282843		0.505	0.507	0.506	0.00141421	3.33	3.35	3.34	0.0141421
162	0.415	0.419	0.417	0.00282843	2.57	2.59	2.58	0.0141421		0.445	0.451	0.448	0.00424264	2.75	2.79	2.77	0.0282843		0.53	0.548	0.539	0.0127279	3.28	3.39	3.335	0.0777817
172	0.433	0.446	0.4395	0.00919239	2.52	2.6	2.56	0.0565685		0.492	0.498	0.495	0.00424264	2.87	2.9	2.885	0.0212132		0.579	0.568	0.5735	0.00777817	3.37	3.3	3.335	0.0494975
182	0.482	0.476	0.479	0.00424264	2.65	2.62	2.635	0.0212132		0.488	0.495	0.4915	0.00494975	2.68	2.72	2.7	0.0282843		0.588	0.638	0.613	0.0353553	3.23	3.51	3.37	0.19799
192	0.531	0.531	0.531	0	2.77	2.77	2.77	0		0.535	0.543	0.539	0.00565685	2.78	2.83	2.805	0.0353553		0.646	0.686	0.666	0.0282843	3.37	3.57	3.47	0.141421
202	0.551	0.544	0.5475	0.00494975	2.72	2.69	2.705	0.0212132		0.55	0.559	0.5545	0.00636396	2.72	2.76	2.74	0.0282843		0.665	0.722	0.6935	0.0403051	3.29	3.57	3.43	0.19799
212	0.535	0.546	0.5405	0.00777817	2.52	2.57	2.545	0.0353553		0.606	0.612	0.609	0.00424264	2.85	2.89	2.87	0.0282843		0.71	0.709	0.7095	0.000707107	3.35	3.34	3.345	0.00707107
222	0.601	0.603	0.602	0.00141421	2.71	2.71	2.71	0		0.626	0.635	0.6305	0.00636396	2.81	2.86	2.835	0.0353553		0.748	0.785	0.7665	0.026163	3.37	3.53	3.45	0.113137
232	0.622	0.63	0.626	0.00565685	2.67	2.71	2.69	0.0282843		0.668	0.677	0.6725	0.00636396	2.88	2.91	2.895	0.0212132		0.793	0.809	0.801	0.0113137	3.41	3.48	3.445	0.0494975
243	0.641	0.655	0.648	0.00989949	2.64	2.7	2.67	0.0424264		0.709	0.718	0.7135	0.00636396	2.92	2.96	2.94	0.0282843		0.836	0.834	0.835	0.00141421	3.45	3.44	3.445	0.00707107
253	0.703	0.708	0.7055	0.00353553	2.78	2.8	2.79	0.0141421		0.728	0.738	0.733	0.00707107	2.88	2.92	2.9	0.0282843		0.871	0.907	0.889	0.0254558	3.45	3.59	3.52	0.0989949
263	0.693	0.721	0.707	0.019799	2.64	2.74	2.69	0.0707107		0.797	0.805	0.801	0.00565685	3.03	3.06	3.045	0.0212132		0.931	0.895	0.913	0.0254558	3.54	3.41	3.475	0.0919239
273	0.707	0.732	0.7195	0.0176777	2.59	2.68	2.635	0.0636396		0.82	0.827	0.8235	0.00494975	3.01	3.03	3.02	0.0141421		0.954	0.923	0.9385	0.0219203	3.5	3.38	3.44	0.0848528
283	0.773	0.801	0.787	0.019799	2.73	2.83	2.78	0.0707107		0.868	0.878	0.873	0.00707107	3.07	3.1	3.085	0.0212132		1.02	0.986	1.003	0.0240416	3.6	3.48	3.54	0.0848528
293	0.813	0.809	0.811	0.00282843	2.77	2.76	2.765	0.00707107		0.838	0.849	0.8435	0.00777817	2.86	2.9	2.88	0.0282843		0.999	1.06	1.0295	0.0431335	3.41	3.62	3.515	0.148492
303	0.844	0.859	0.8515	0.0106066	2.78	2.83	2.805	0.0353553		0.908	0.919	0.9135	0.00777817	3	3.03	3.015	0.0212132		1.07	1.08	1.075	0.00707107	3.54	3.58	3.56	0.0282843
313	0.865	0.876	0.8705	0.00777817	2.76	2.8	2.78	0.0282843		0.931	0.942	0.9365	0.00777817	2.97	3.01	2.99	0.0282843		1.1	1.12	1.11	0.0141421	3.51	3.57	3.54	0.0424264
323	0.881	0.896	0.8885	0.0106066	2.73	2.77	2.75	0.0282843		0.971	0.981	0.976	0.00707107	3	3.03	3.015	0.0212132		1.14	1.14	1.14	0	3.52	3.53	3.525	0.00707107
333	0.971	0.973	0.972	0.00141421	2.91	2.92	2.915	0.00707107		1	1.01	1.005	0.00707107	3	3.04	3.02	0.0282843		1.19	1.23	1.21	0.0282843	3.56	3.68	3.62	0.0848528
343	1.02	1.02	1.02	0	2.97	2.97	2.97	0		1.08	1.09	1.085	0.00707107	3.14	3.17	3.155	0.0212132		1.25	1.21	1.23	0.0282843	3.65	3.54	3.595	0.0777817
354	1.11	1.12	1.115	0.00707107	3.13	3.17	3.15	0.0282843		1.12	1.13	1.125	0.00707107	3.16	3.18	3.17	0.0141421		1.29	1.25	1.27	0.0282843	3.66	3.53	3.595	0.0919239
364	1.24	1.23	1.235	0.00707107	3.41	3.39	3.4	0.0141421		1.15	1.14	1.145	0.00707107	3.16	3.14	3.15	0.0141421		1.32	1.35	1.335	0.0212132	3.63	3.7	3.665	0.0494975
374	1.26	1.25	1.255	0.00707107	3.36	3.34	3.35	0.0141421		1.23	1.2	1.215	0.0212132	3.3	3.21	3.255	0.0636396		1.32	1.34	1.33	0.0141421	3.54	3.6	3.57	0.0424264
384	1.37	1.36	1.365	0.00707107	3.56	3.54	3.55	0.0141421		1.32	1.31	1.315	0.00707107	3.44	3.4	3.42	0.0282843		1.37	1.41	1.39	0.0282843	3.57	3.68	3.625	0.0777817
394	1.35	1.38	1.365	0.0212132	3.43	3.51	3.47	0.0565685		1.43	1.41	1.42	0.0141421	3.62	3.59	3.605	0.0212132		1.43	1.44	1.435	0.00707107	3.62	3.66	3.64	0.0282843
404	1.42	1.42	1.42	0	3.52	3.52	3.52	0		1.51	1.5	1.505	0.00707107	3.73	3.71	3.72	0.0141421		1.47	1.51	1.49	0.0282843	3.64	3.73	3.685	0.0636396
414	1.41	1.43	1.42	0.0141421	3.41	3.45	3.43	0.0282843		1.56	1.59	1.575	0.0212132	3.77	3.85	3.81	0.0565685		1.5	1.5	1.5	0	3.63	3.61	3.62	0.0141421
424	1.48	1.48	1.48	0	3.5	3.48	3.49	0.0141421		1.55	1.58	1.565	0.0212132	3.64	3.71	3.675	0.0494975		1.51	1.58	1.545	0.0494975	3.56	3.71	3.635	0.106066
434	1.53	1.52	1.525	0.00707107	3.53	3.5	3.515	0.0212132		1.62	1.6	1.61	0.0141421	3.72	3.69	3.705	0.0212132		1.58	1.61	1.595	0.0212132	3.63	3.7	3.665	0.0494975
444	1.61	1.64	1.625	0.0212132	3.62	3.69	3.655	0.0494975		1.73	1.72	1.725	0.00707107	3.9	3.87	3.885	0.0212132		1.77	1.66	1.715	0.0777817	3.98	3.74	3.86	0.169706
455	1.68	1.68	1.68	0	3.71	3.7	3.705	0.00707107		1.74	1.72	1.73	0.0141421	3.82	3.79	3.805	0.0212132		1.83	1.84	1.835	0.00707107	4.02	4.05	4.035	0.0212132
465	1.75	1.76	1.755	0.00707107	3.77	3.78	3.775	0.00707107		1.81	1.81	1.81	0	3.89	3.89	3.89	0		1.96	1.95	1.955	0.00707107	4.21	4.2	4.205	0.00707107
475	1.82	1.82	1.82	0	3.84	3.83	3.835	0.00707107		1.88	1.87	1.875	0.00707107	3.95	3.94	3.945	0.00707107		2.07	2.04	2.055	0.0212132	4.36	4.3	4.33	0.0424264
485	1.92	1.93	1.925	0.00707107	3.96	3.98	3.97	0.0141421		1.93	1.92	1.925	0.00707107	3.98	3.95	3.965	0.0212132		2.17	2.19	2.18	0.0141421	4.48	4.51	4.495	0.0212132
495	1.94	1.97	1.955	0.0212132	3.92	3.97	3.945	0.0353553		2.03	2.04	2.035	0.00707107	4.1	4.12	4.11	0.0141421		2.26	2.23	2.245	0.0212132	4.57	4.51	4.54	0.0424264
505	1.96	1.99	1.975	0.0212132	3.88	3.95	3.915	0.0494975		2.07	2.08	2.075	0.00707107	4.1	4.12	4.11	0.0141421		2.21	2.29	2.25	0.0565685	4.38	4.53	4.455	0.106066
515	2.01	2.1	2.055	0.0636396	3.91	4.07	3.99	0.113137		2.16	2.15	2.155	0.00707107	4.19	4.18	4.185	0.00707107		2.31	2.28	2.295	0.0212132	4.49	4.42	4.455	0.0494975
525	2.15	2.19	2.17	0.0282843	4.08	4.18	4.13	0.0707107		2.18	2.22	2.2	0.0282843	4.15	4.23	4.19	0.0565685		2.37	2.42	2.395	0.0353553	4.51	4.6	4.555	0.0636396
535	2.17	2.22	2.195	0.0353553	4.04	4.14	4.09	0.0707107		2.3	2.31	2.305	0.00707107	4.3	4.31	4.305	0.00707107		2.44	2.43	2.435	0.00707107	4.55	4.55	4.55	0
545	2.29	2.29	2.29	0	4.2	4.19	4.195	0.00707107		2.38	2.41	2.395	0.0212132	4.37	4.42	4.395	0.0353553		2.49	2.54	2.515	0.0353553	4.57	4.66	4.615	0.0636396
556	2.33	2.35	2.34	0.0141421	4.19	4.23	4.21	0.0282843		2.44	2.43	2.435	0.00707107	4.39	4.38	4.385	0.00707107		2.57	2.63	2.6	0.0424264	4.62	4.73	4.675	0.0777817
566	2.37	2.43	2.4	0.0424264	4.19	4.3	4.245	0.0777817		2.48	2.53	2.505	0.0353553	4.39	4.47	4.43	0.0565685		2.67	2.65	2.66	0.0141421	4.72	4.69	4.705	0.0212132
576	2.45	2.46	2.455	0.00707107	4.25	4.28	4.265	0.0212132		2.49	2.54	2.515	0.0353553	4.33	4.41	4.37	0.0565685		2.67	2.76	2.715	0.0636396	4.64	4.79	4.715	0.106066
586	2.56	2.55	2.555	0.00707107	4.36	4.35	4.355	0.00707107		2.56	2.61	2.585	0.0353553	4.38	4.45	4.415	0.0494975		2.77	2.86	2.815	0.0636396	4.73	4.89	4.81	0.113137
596	2.59	2.58	2.585	0.00707107	4.34	4.33	4.335	0.00707107		2.67	2.68	2.675	0.00707107	4.48	4.5	4.49	0.0141421		2.9	2.87	2.885	0.0212132	4.87	4.82	4.845	0.0353553
606	2.73	2.76	2.745	0.0212132	4.51	4.56	4.535	0.0353553		2.79	2.86	2.825	0.0494975	4.6	4.71	4.655	0.0777817		3.06	2.97	3.015	0.0636396	5.05	4.9	4.975	0.106066
616	2.78	2.73	2.755	0.0353553	4.51	4.43	4.47	0.0565685		2.85	2.87	2.86	0.0141421	4.62	4.66	4.64	0.0282843		3.12	3.09	3.105	0.0212132	5.07	5.01	5.04	0.0424264
626	2.88	2.83	2.855	0.0353553	4.6	4.53	4.565	0.0494975		2.94	2.93	2.935	0.00707107	4.69	4.69	4.69	0		3.23	3.23	3.23	0	5.15	5.16	5.155	0.00707107
636	2.99	2.94	2.965	0.0353553	4.7	4.61	4.655	0.0636396		2.96	2.99	2.975	0.0212132	4.65	4.69	4.67	0.0282843		3.25	3.32	3.285	0.0494975	5.11	5.22	5.165	0.0777817
647	3.05	3.03	3.04	0.0141421	4.72	4.69	4.705	0.0212132		3.09	3.12	3.105	0.0212132	4.77	4.83	4.8	0.0424264		3.39	3.33	3.36	0.0424264	5.24	5.16	5.2	0.0565685
657	3.09	3.04	3.065	0.0353553	4.71	4.63	4.67	0.0565685		3.14	3.18	3.16	0.0282843	4.78	4.85	4.815	0.0494975		3.42	3.39	3.405	0.0212132	5.22	5.17	5.195	0.0353553
667	3.14	3.12	3.13	0.0141421	4.7	4.68	4.69	0.0141421		3.27	3.27	3.27	0	4.9	4.9	4.9	0		3.47	3.52	3.495	0.0353553	5.21	5.28	5.245	0.0494975
677	3.33	3.32	3.325	0.00707107	4.92	4.9	4.91	0.0141421		3.38	3.4	3.39	0.0141421	5	5.02	5.01	0.0141421		3.58	3.61	3.595	0.0212132	5.29	5.33	5.31	0.0282843
687	3.37	3.34	3.355	0.0212132	4.9	4.87	4.885	0.0212132		3.39	3.44	3.415	0.0353553	4.94	5.01	4.975	0.0494975		3.6	3.72	3.66	0.0848528	5.23	5.42	5.325	0.13435
697	3.5	3.45	3.475	0.0353553	5.02	4.95	4.985	0.0494975		3.48	3.53	3.505	0.0353553	4.99	5.06	5.025	0.0494975		3.69	3.8	3.745	0.0777817	5.3	5.45	5.375	0.106066
707	3.57	3.52	3.545	0.0353553	5.05	4.97	5.01	0.0565685		3.6	3.65	3.625	0.0353553	5.09	5.16	5.125	0.0494975		3.8	3.84	3.82	0.0282843	5.38	5.43	5.405	0.0353553
717	3.66	3.63	3.645	0.0212132	5.11	5.06	5.085	0.0353553		3.67	3.77	3.72	0.0707107	5.12	5.25	5.185	0.0919239		3.99	3.98	3.985	0.00707107	5.57	5.54	5.555	0.0212132
727	3.68	3.64	3.66	0.0282843	5.06	5.01	5.035	0.0353553		3.79	3.81	3.8	0.0141421	5.21	5.23	5.22	0.0141421		4	3.99	3.995	0.00707107	5.5	5.49	5.495	0.00707107
737	3.81	3.81	3.81	0	5.17	5.16	5.165	0.00707107		3.84	3.93	3.885	0.0636396	5.2	5.33	5.265	0.0919239		4.07	4.13	4.1	0.0424264	5.51	5.6	5.555	0.0636396
747	3.88	3.88	3.88	0	5.19	5.19	5.19	0		3.93	3.99	3.96	0.0424264	5.25	5.34	5.295	0.0636396		4.16	4.21	4.185	0.0353553	5.56	5.63	5.595	0.0494975
758	3.97	4	3.985	0.0212132	5.24	5.28	5.26	0.0282843		4.09	4.13	4.11	0.0282843	5.4	5.45	5.425	0.0353553		4.32	4.29	4.305	0.0212132	5.7	5.66	5.68	0.0282843
768	4.1	4.08	4.09	0.0141421	5.34	5.31	5.325	0.0212132		4.05	4.25	4.15	0.141421	5.28	5.53	5.405	0.176777		4.39	4.46	4.425	0.0494975	5.71	5.81	5.76	0.0707107
778	4.2	4.18	4.19	0.0141421	5.4	5.37	5.385	0.0212132		4.18	4.27	4.225	0.0636396	5.38	5.49	5.435	0.0777817		4.5	4.51	4.505	0.00707107	5.79	5.79	5.79	0
788	4.26	4.26	4.26	0	5.4	5.41	5.405	0.00707107		4.37	4.42	4.395	0.0353553	5.55	5.61	5.58	0.0424264		4.67	4.63	4.65	0.0282843	5.93	5.87	5.9	0.0424264
798	4.35	4.37	4.36	0.0141421	5.45	5.47	5.46	0.0141421		4.47	4.47	4.47	0	5.61	5.6	5.605	0.00707107		4.75	4.78	4.765	0.0212132	5.96	6	5.98	0.0282843
808	4.37	4.44	4.405	0.0494975	5.41	5.5	5.455	0.0636396		4.61	4.63	4.62	0.0141421	5.71	5.72	5.715	0.00707107		4.9	4.83	4.865	0.0494975	6.06	5.98	6.02	0.0565685
818	4.38	4.5	4.44	0.0848528	5.36	5.5	5.43	0.0989949		4.69	4.7	4.695	0.00707107	5.73	5.75	5.74	0.0141421		4.92	4.97	4.945	0.0353553	6.01	6.08	6.045	0.0494975
828	4.5	4.63	4.565	0.0919239	5.44	5.59	5.515	0.106066		4.8	4.87	4.835	0.0494975	5.8	5.88	5.84	0.0565685		5.13	5.07	5.1	0.0424264	6.2	6.12	6.16	0.0565685
838	4.65	4.71	4.68	0.0424264	5.54	5.62	5.58	0.0565685		4.83	4.99	4.91	0.113137	5.76	5.96	5.86	0.141421		5.13	5.25	5.19	0.0848528	6.11	6.27	6.19	0.113137
848	4.76	4.81	4.785	0.0353553	5.61	5.67	5.64	0.0424264		4.96	5.13	5.045	0.120208	5.85	6.05	5.95	0.141421		5.29	5.3	5.295	0.00707107	6.24	6.25	6.245	0.00707107
859	4.85	4.86	4.855	0.00707107	5.65	5.67	5.66	0.0141421		5.04	5.21	5.125	0.120208	5.87	6.06	5.965	0.13435		5.42	5.35	5.385	0.0494975	6.32	6.23	6.275	0.0636396
869	4.93	4.96	4.945	0.0212132	5.67	5.71	5.69	0.0282843		5.12	5.29	5.205	0.120208	5.9	6.09	5.995	0.13435		5.42	5.53	5.475	0.0777817	6.24	6.37	6.305	0.0919239
879	5.01	5.09	5.05	0.0565685	5.7	5.79	5.745	0.0636396		5.26	5.43	5.345	0.120208	5.99	6.18	6.085	0.13435		5.66	5.66	5.66	0	6.44	6.44	6.44	0
889	5.07	5.11	5.09	0.0282843	5.7	5.75	5.725	0.0353553		5.33	5.5	5.415	0.120208	6	6.19	6.095	0.13435		5.68	5.66	5.67	0.0141421	6.39	6.37	6.38	0.0141421
899	5.15	5.21	5.18	0.0424264	5.73	5.79	5.76	0.0424264		5.41	5.58	5.495	0.120208	6.02	6.21	6.115	0.13435		5.81	5.86	5.835	0.0353553	6.46	6.52	6.49	0.0424264
909	5.29	5.33	5.31	0.0282843	5.82	5.87	5.845	0.0353553		5.56	5.74	5.65	0.127279	6.11	6.31	6.21	0.141421		5.95	5.96	5.955	0.00707107	6.55	6.55	6.55	0
919	5.43	5.42	5.425	0.00707107	5.91	5.89	5.9	0.0141421		5.6	5.79	5.695	0.13435	6.09	6.3	6.195	0.148492		6.08	6.14	6.11	0.0424264	6.62	6.68	6.65	0.0424264
929	5.51	5.55	5.53	0.0282843	5.93	5.97	5.95	0.0282843		5.74	5.92	5.83	0.127279	6.17	6.38	6.275	0.148492		6.19	6.27	6.23	0.0565685	6.66	6.74	6.7	0.0565685
939	5.61	5.57	5.59	0.0282843	5.97	5.93	5.95	0.0282843		5.81	6.01	5.91	0.141421	6.18	6.4	6.29	0.155563		6.34	6.38	6.36	0.0282843	6.75	6.79	6.77	0.0282843
950	5.66	5.62	5.64	0.0282843	5.96	5.92	5.94	0.0282843		5.94	6.12	6.03	0.127279	6.25	6.45	6.35	0.141421		6.46	6.39	6.425	0.0494975	6.81	6.73	6.77	0.0565685
960	5.82	5.74	5.78	0.0565685	6.07	5.98	6.025	0.0636396		5.97	6.19	6.08	0.155563	6.23	6.45	6.34	0.155563		6.44	6.65	6.545	0.148492	6.71	6.93	6.82	0.155563
970	5.9	5.9	5.9	0	6.09	6.09	6.09	0		6.06	6.36	6.21	0.212132	6.25	6.56	6.405	0.219203		6.64	6.64	6.64	0	6.85	6.85	6.85	0
980	5.98	5.97	5.975	0.00707107	6.1	6.09	6.095	0.00707107		6.17	6.46	6.315	0.205061	6.29	6.6	6.445	0.219203		6.79	6.81	6.8	0.0141421	6.93	6.95	6.94	0.0141421
990	6.09	6	6.045	0.0636396	6.15	6.07	6.11	0.0565685		6.27	6.5	6.385	0.162635	6.34	6.57	6.455	0.162635		6.82	6.98	6.9	0.113137	6.89	7.05	6.97	0.113137
1000	6.17	6.22	6.195	0.0353553	6.17	6.22	6.195	0.0353553		6.42	6.67	6.545	0.176777	6.42	6.67	6.545	0.176777		6.98	6.99	6.985	0.00707107	6.98	6.99	6.985	0.00707107
				0.0167315				0.117083					0.0370401				0.114056					0.0272142				0.223446

## Sheet: Hoja3
Solución 0.5%							Solución 1%					solución 2%
	rep 1	Rep2	Promedio	S			rep1	rep2	Promedio	S		rep1	rep2	Promedio	S
b1	1.28	1.3	1.29	0.0141421			1.28	1.28	1.28	0		1.242	1.083	1.1625	0.11243
r2	0.99	0.983	0.9865				0.982	0.981	0.9815			0.983	0.963	0.973

## Sheet: Hoja4
0.1	-0.00112				0.1	0.00115
10.2	0.0316				10.2	0.0301
20.3	0.0636				20.3	0.0643
30.4	0.0949				30.4	0.0907
40.5	0.126				40.5	0.122
50.6	0.164				50.6	0.159
60.7	0.185				60.7	0.196
70.8	0.225				70.8	0.231
80.9	0.257				80.9	0.261
91	0.298				91	0.295
101	0.313				101	0.336
111	0.36				111	0.384
121	0.391				121	0.422
131	0.414				131	0.434
141	0.474				141	0.481
152	0.505				152	0.507
162	0.53				162	0.548
172	0.579				172	0.568
182	0.588				182	0.638
192	0.646				192	0.686
202	0.665				202	0.722
212	0.71				212	0.709
222	0.748				222	0.785
232	0.793				232	0.809
242	0.836				243	0.834
253	0.871				253	0.907
263	0.931				263	0.895
273	0.954				273	0.923
283	1.02				283	0.986
293	0.999				293	1.06
303	1.07				303	1.08
313	1.1				313	1.12
323	1.14				323	1.14
333	1.19				333	1.23
343	1.25				343	1.21
354	1.29				354	1.25
364	1.32				364	1.35
374	1.32				374	1.34
384	1.37				384	1.41
394	1.43				394	1.44
404	1.47				404	1.51
414	1.5				414	1.5
424	1.51				424	1.58
434	1.58				434	1.61
444	1.77				444	1.66
455	1.83				455	1.84
465	1.96				465	1.95
475	2.07				475	2.04
485	2.17				485	2.19
495	2.26				495	2.23
505	2.21				505	2.29
515	2.31				515	2.28
525	2.37				525	2.42
535	2.44				535	2.43
546	2.49				546	2.54
556	2.57				556	2.63
566	2.67				566	2.65
576	2.67				576	2.76
586	2.77				586	2.86
596	2.9				596	2.87
606	3.06				606	2.97
616	3.12				616	3.09
626	3.23				626	3.23
636	3.25				636	3.32
647	3.39				647	3.33
657	3.42				657	3.39
667	3.47				667	3.52
677	3.58				677	3.61
687	3.6				687	3.72
697	3.69				697	3.8
707	3.8				707	3.84
717	3.99				717	3.98
727	4				727	3.99
737	4.07				737	4.13
747	4.16				747	4.21
758	4.32				758	4.29
768	4.39				768	4.46
778	4.5				778	4.51
788	4.67				788	4.63
798	4.75				798	4.78
808	4.9				808	4.83
818	4.92				818	4.97
828	5.13				828	5.07
838	5.13				838	5.25
848	5.29				848	5.3
859	5.42				859	5.35
869	5.42				869	5.53
879	5.66				879	5.66
889	5.68				889	5.66
899	5.81				899	5.86
909	5.95				909	5.96
919	6.08				919	6.14
929	6.19				929	6.27
939	6.34				939	6.38
949	6.46				950	6.39
960	6.44				960	6.65
970	6.64				970	6.64
980	6.79				980	6.81
990	6.82				990	6.98
1000	6.98				1000	6.99
