# Supplementary material for: Microparticles from Wheat-Gluten Proteins Soluble in Ethanol by Nanoprecipitation: Preparation, Characterization, and Their Study as a Prolonged-Release Fertilizer
Source: Hindawi journal article supplement (doi:10.1155/2018/1042798), 2018-10-11
Supplement: f2 [file 1042798.f2.xlsx]

## Sheet: Hoja1
Wavenumber (cm-1)	%T
4000	97.5185
3998	97.511
3996	97.4977
3994	97.5153
3992	97.5111
3990	97.5114
3988	97.5109
3986	97.5092
3984	97.5108
3982	97.5116
3980	97.5088
3978	97.5052
3976	97.505
3974	97.506
3972	97.505
3970	97.5048
3968	97.5062
3966	97.5034
3964	97.4991
3962	97.4995
3960	97.4984
3958	97.4955
3956	97.4967
3954	97.4951
3952	97.4877
3950	97.477
3948	97.4671
3946	97.4608
3944	97.4678
3942	97.4807
3940	97.4808
3938	97.4852
3936	97.4831
3934	97.467
3932	97.4693
3930	97.4786
3928	97.478
3926	97.4822
3924	97.4861
3922	97.4694
3920	97.4584
3918	97.4639
3916	97.4744
3914	97.482
3912	97.4925
3910	97.4989
3908	97.4885
3906	97.4697
3904	97.434
3902	97.3985
3900	97.4108
3898	97.4417
3896	97.4476
3894	97.457
3892	97.4777
3890	97.4749
3888	97.4453
3886	97.44
3884	97.4474
3882	97.4375
3880	97.46
3878	97.4614
3876	97.4496
3874	97.4597
3872	97.4345
3870	97.4188
3868	97.4314
3866	97.4182
3864	97.4404
3862	97.4473
3860	97.4413
3858	97.456
3856	97.4638
3854	97.4471
3852	97.4439
3850	97.4483
3848	97.4542
3846	97.4601
3844	97.4635
3842	97.4566
3840	97.4472
3838	97.4447
3836	97.4439
3834	97.4468
3832	97.4556
3830	97.4685
3828	97.476
3826	97.4862
3824	97.4666
3822	97.4474
3820	97.466
3818	97.4517
3816	97.4634
3814	97.4956
3812	97.498
3810	97.5009
3808	97.4917
3806	97.4884
3804	97.471
3802	97.4681
3800	97.4818
3798	97.4737
3796	97.4924
3794	97.5096
3792	97.5184
3790	97.5294
3788	97.5256
3786	97.5216
3784	97.5181
3782	97.5025
3780	97.5048
3778	97.5227
3776	97.5234
3774	97.5251
3772	97.5214
3770	97.5171
3768	97.5089
3766	97.5055
3764	97.5152
3762	97.5008
3760	97.4981
3758	97.4969
3756	97.4808
3754	97.4581
3752	97.4433
3750	97.4167
3748	97.415
3746	97.4196
3744	97.4284
3742	97.4466
3740	97.4422
3738	97.4263
3736	97.4454
3734	97.5231
3732	97.5413
3730	97.5115
3728	97.4591
3726	97.4457
3724	97.4537
3722	97.4776
3720	97.5173
3718	97.5347
3716	97.5216
3714	97.4815
3712	97.434
3710	97.4143
3708	97.4502
3706	97.4982
3704	97.5277
3702	97.5469
3700	97.5211
3698	97.4738
3696	97.4422
3694	97.3883
3692	97.3595
3690	97.398
3688	97.3898
3686	97.3475
3684	97.3196
3682	97.306
3680	97.2826
3678	97.2229
3676	97.174
3674	97.1781
3672	97.1522
3670	97.1646
3668	97.1788
3666	97.1716
3664	97.1702
3662	97.1615
3660	97.1456
3658	97.1269
3656	97.1159
3654	97.095
3652	97.0524
3650	97.025
3648	96.9924
3646	97
3644	97.0218
3642	97.047
3640	97.057
3638	97.0463
3636	97.0173
3634	96.9836
3632	96.9549
3630	96.8989
3628	96.8557
3626	96.8389
3624	96.8505
3622	96.8907
3620	96.9111
3618	96.8342
3616	96.7199
3614	96.6584
3612	96.6174
3610	96.5634
3608	96.5393
3606	96.5381
3604	96.5304
3602	96.5129
3600	96.4852
3598	96.4396
3596	96.3777
3594	96.3227
3592	96.2786
3590	96.2356
3588	96.1975
3586	96.1395
3584	96.0865
3582	96.0643
3580	96.0439
3578	96.0024
3576	95.9504
3574	95.8968
3572	95.8366
3570	95.7666
3568	95.6926
3566	95.6199
3564	95.5565
3562	95.5227
3560	95.5014
3558	95.4671
3556	95.4202
3554	95.367
3552	95.3078
3550	95.2387
3548	95.169
3546	95.1081
3544	95.0531
3542	95.0128
3540	94.9793
3538	94.9347
3536	94.8817
3534	94.8296
3532	94.7801
3530	94.7274
3528	94.6626
3526	94.593
3524	94.5398
3522	94.5003
3520	94.4545
3518	94.4072
3516	94.3581
3514	94.3077
3512	94.2535
3510	94.1935
3508	94.1269
3506	94.0561
3504	93.9893
3502	93.9241
3500	93.8593
3498	93.8009
3496	93.7408
3494	93.6744
3492	93.6073
3490	93.5375
3488	93.4599
3486	93.3832
3484	93.309
3482	93.2265
3480	93.1437
3478	93.0772
3476	93.0155
3474	92.9444
3472	92.8625
3470	92.7797
3468	92.704
3466	92.6378
3464	92.5776
3462	92.5116
3460	92.4433
3458	92.384
3456	92.3226
3454	92.2586
3452	92.1958
3450	92.1293
3448	92.0573
3446	91.9841
3444	91.9169
3442	91.8535
3440	91.7803
3438	91.703
3436	91.6318
3434	91.5678
3432	91.5012
3430	91.4318
3428	91.3724
3426	91.316
3424	91.2482
3422	91.1736
3420	91.0991
3418	91.033
3416	90.9714
3414	90.9072
3412	90.8446
3410	90.7864
3408	90.7313
3406	90.6762
3404	90.6156
3402	90.5535
3400	90.4971
3398	90.4453
3396	90.3909
3394	90.3378
3392	90.2855
3390	90.2327
3388	90.1818
3386	90.124
3384	90.0569
3382	89.9908
3380	89.9243
3378	89.8508
3376	89.7734
3374	89.6988
3372	89.6239
3370	89.5414
3368	89.4458
3366	89.3359
3364	89.2191
3362	89.1112
3360	89.0035
3358	88.8901
3356	88.7794
3354	88.6828
3352	88.597
3350	88.4913
3348	88.3685
3346	88.2638
3344	88.1751
3342	88.0836
3340	87.9912
3338	87.8858
3336	87.7618
3334	87.6433
3332	87.5356
3330	87.4433
3328	87.3727
3326	87.2923
3324	87.1804
3322	87.0722
3320	86.975
3318	86.8788
3316	86.7919
3314	86.7212
3312	86.6701
3310	86.6374
3308	86.594
3306	86.5199
3304	86.4121
3302	86.3038
3300	86.2389
3298	86.2168
3296	86.1974
3294	86.171
3292	86.1308
3290	86.0709
3288	86.032
3286	86.0292
3284	86.0421
3282	86.0633
3280	86.0973
3278	86.1541
3276	86.2297
3274	86.3188
3272	86.4101
3270	86.4625
3268	86.5008
3266	86.572
3264	86.6641
3262	86.7656
3260	86.8765
3258	87.0022
3256	87.1201
3254	87.2095
3252	87.3061
3250	87.4331
3248	87.5593
3246	87.6439
3244	87.7026
3242	87.7718
3240	87.8487
3238	87.9311
3236	88.0282
3234	88.1066
3232	88.1279
3230	88.1298
3228	88.1424
3226	88.1627
3224	88.1827
3222	88.2018
3220	88.2186
3218	88.2257
3216	88.2309
3214	88.2421
3212	88.2548
3210	88.2739
3208	88.2981
3206	88.3254
3204	88.3591
3202	88.4009
3200	88.4464
3198	88.5008
3196	88.5644
3194	88.6332
3192	88.7093
3190	88.7935
3188	88.8804
3186	88.9766
3184	89.0834
3182	89.1955
3180	89.3107
3178	89.4248
3176	89.5376
3174	89.6579
3172	89.7812
3170	89.9016
3168	90.0199
3166	90.1399
3164	90.2604
3162	90.3768
3160	90.4881
3158	90.5985
3156	90.7131
3154	90.8306
3152	90.9334
3150	91.0212
3148	91.112
3146	91.2076
3144	91.3045
3142	91.406
3140	91.5002
3138	91.5735
3136	91.6422
3134	91.721
3132	91.8016
3130	91.8743
3128	91.9359
3126	91.9994
3124	92.0725
3122	92.1521
3120	92.2204
3118	92.2731
3116	92.3063
3114	92.3182
3112	92.3423
3110	92.385
3108	92.4029
3106	92.4016
3104	92.4149
3102	92.4439
3100	92.4551
3098	92.4364
3096	92.4226
3094	92.4289
3092	92.4467
3090	92.448
3088	92.4347
3086	92.4344
3084	92.4335
3082	92.4299
3080	92.4275
3078	92.394
3076	92.3289
3074	92.2804
3072	92.2679
3070	92.2836
3068	92.3026
3066	92.2861
3064	92.2581
3062	92.2479
3060	92.2692
3058	92.3145
3056	92.3523
3054	92.3879
3052	92.4358
3050	92.4706
3048	92.5085
3046	92.5719
3044	92.6303
3042	92.6645
3040	92.6699
3038	92.688
3036	92.7415
3034	92.7811
3032	92.788
3030	92.7882
3028	92.8036
3026	92.844
3024	92.8684
3022	92.8744
3020	92.8825
3018	92.883
3016	92.8735
3014	92.8503
3012	92.804
3010	92.7445
3008	92.7044
3006	92.6959
3004	92.6962
3002	92.6916
3000	92.6832
2998	92.6557
2996	92.6086
2994	92.5548
2992	92.4365
2990	92.257
2988	92.1154
2986	92.0175
2984	91.9242
2982	91.8026
2980	91.6441
2978	91.4714
2976	91.295
2974	91.1051
2972	90.9133
2970	90.7371
2968	90.5714
2966	90.4203
2964	90.2879
2962	90.1788
2960	90.1108
2958	90.0989
2956	90.1418
2954	90.231
2952	90.3411
2950	90.445
2948	90.5118
2946	90.5129
2944	90.4425
2942	90.3198
2940	90.1608
2938	89.9718
2936	89.7667
2934	89.5731
2932	89.4085
2930	89.2756
2928	89.1813
2926	89.1469
2924	89.1809
2922	89.2856
2920	89.4639
2918	89.6927
2916	89.9342
2914	90.1575
2912	90.356
2910	90.5493
2908	90.7336
2906	90.8988
2904	91.0264
2902	91.1223
2900	91.2502
2898	91.4147
2896	91.5443
2894	91.6239
2892	91.6905
2890	91.7506
2888	91.7872
2886	91.7992
2884	91.7955
2882	91.7867
2880	91.7718
2878	91.7513
2876	91.7417
2874	91.7501
2872	91.7763
2870	91.8421
2868	91.9502
2866	92.0656
2864	92.1498
2862	92.1908
2860	92.1804
2858	92.1384
2856	92.113
2854	92.1501
2852	92.277
2850	92.486
2848	92.7393
2846	92.9939
2844	93.2285
2842	93.4396
2840	93.618
2838	93.7464
2836	93.8384
2834	93.9186
2832	93.9887
2830	94.0466
2828	94.098
2826	94.1467
2824	94.1925
2822	94.2339
2820	94.2722
2818	94.3093
2816	94.3431
2814	94.3756
2812	94.4096
2810	94.4407
2808	94.4627
2806	94.4855
2804	94.5117
2802	94.5418
2800	94.5763
2798	94.6052
2796	94.6261
2794	94.6478
2792	94.6734
2790	94.6988
2788	94.7178
2786	94.7367
2784	94.7599
2782	94.7862
2780	94.8153
2778	94.8442
2776	94.8704
2774	94.8916
2772	94.9072
2770	94.9247
2768	94.9462
2766	94.9695
2764	94.9903
2762	95.009
2760	95.0292
2758	95.0504
2756	95.0713
2754	95.0929
2752	95.1158
2750	95.1385
2748	95.1559
2746	95.168
2744	95.1818
2742	95.1988
2740	95.2172
2738	95.2357
2736	95.2498
2734	95.2644
2732	95.2812
2730	95.302
2728	95.3282
2726	95.3507
2724	95.3637
2722	95.3772
2720	95.3941
2718	95.4132
2716	95.4317
2714	95.4491
2712	95.4653
2710	95.4828
2708	95.4985
2706	95.5128
2704	95.5275
2702	95.5406
2700	95.5503
2698	95.5624
2696	95.5752
2694	95.5838
2692	95.5898
2690	95.5985
2688	95.6093
2686	95.6186
2684	95.6284
2682	95.6428
2680	95.6528
2678	95.6587
2676	95.667
2674	95.6747
2672	95.6813
2670	95.6899
2668	95.6943
2666	95.6939
2664	95.6918
2662	95.69
2660	95.6899
2658	95.6941
2656	95.7011
2654	95.7067
2652	95.7095
2650	95.7164
2648	95.7247
2646	95.7321
2644	95.7392
2642	95.7501
2640	95.7621
2638	95.7729
2636	95.7834
2634	95.7899
2632	95.7941
2630	95.8008
2628	95.8111
2626	95.8256
2624	95.8344
2622	95.8384
2620	95.8484
2618	95.8646
2616	95.8729
2614	95.8769
2612	95.8848
2610	95.8963
2608	95.9079
2606	95.9202
2604	95.9293
2602	95.9366
2600	95.9449
2598	95.9546
2596	95.9647
2594	95.9805
2592	95.9941
2590	96.0026
2588	96.0111
2586	96.0209
2584	96.0258
2582	96.0325
2580	96.0436
2578	96.0559
2576	96.0667
2574	96.0827
2572	96.0963
2570	96.1054
2568	96.1111
2566	96.1194
2564	96.1262
2562	96.1319
2560	96.138
2558	96.1504
2556	96.1579
2554	96.1633
2552	96.1711
2550	96.179
2548	96.1849
2546	96.1926
2544	96.1988
2542	96.2074
2540	96.2122
2538	96.2161
2536	96.225
2534	96.2302
2532	96.2274
2530	96.2316
2528	96.2425
2526	96.251
2524	96.2518
2522	96.2555
2520	96.2628
2518	96.2717
2516	96.2735
2514	96.2759
2512	96.2868
2510	96.2913
2508	96.2854
2506	96.2881
2504	96.2965
2502	96.3009
2500	96.2984
2498	96.2988
2496	96.3049
2494	96.3175
2492	96.3256
2490	96.3287
2488	96.3287
2486	96.3354
2484	96.3427
2482	96.3474
2480	96.351
2478	96.3567
2476	96.3641
2474	96.3756
2472	96.3801
2470	96.3812
2468	96.384
2466	96.3923
2464	96.3931
2462	96.3931
2460	96.3945
2458	96.398
2456	96.4005
2454	96.4063
2452	96.4148
2450	96.4242
2448	96.4317
2446	96.4421
2444	96.4476
2442	96.4572
2440	96.4737
2438	96.4871
2436	96.4907
2434	96.4957
2432	96.4988
2430	96.5015
2428	96.505
2426	96.514
2424	96.5191
2422	96.5286
2420	96.5391
2418	96.5489
2416	96.5509
2414	96.5512
2412	96.5453
2410	96.5497
2408	96.5657
2406	96.5807
2404	96.587
2402	96.5965
2400	96.5996
2398	96.5989
2396	96.5987
2394	96.6047
2392	96.6085
2390	96.6141
2388	96.6111
2386	96.6049
2384	96.6022
2382	96.6227
2380	96.6482
2378	96.6384
2376	96.5929
2374	96.5842
2372	96.6255
2370	96.6897
2368	96.6989
2366	96.6599
2364	96.6079
2362	96.5722
2360	96.5308
2358	96.5681
2356	96.6126
2354	96.5892
2352	96.647
2350	96.6616
2348	96.4116
2346	96.3992
2344	96.5868
2342	96.5075
2340	96.4821
2338	96.4659
2336	96.4585
2334	96.4471
2332	96.493
2330	96.5163
2328	96.436
2326	96.2979
2324	96.2525
2322	96.3073
2320	96.2909
2318	96.2358
2316	96.2394
2314	96.3045
2312	96.3811
2310	96.4191
2308	96.4579
2306	96.499
2304	96.5233
2302	96.5345
2300	96.5451
2298	96.5502
2296	96.5487
2294	96.5414
2292	96.5328
2290	96.5258
2288	96.5236
2286	96.5347
2284	96.5583
2282	96.5841
2280	96.62
2278	96.6519
2276	96.6689
2274	96.6835
2272	96.6876
2270	96.6872
2268	96.7024
2266	96.7274
2264	96.7305
2262	96.7184
2260	96.7039
2258	96.7035
2256	96.7236
2254	96.7509
2252	96.7552
2250	96.7516
2248	96.7511
2246	96.7548
2244	96.7603
2242	96.7559
2240	96.7412
2238	96.7472
2236	96.7749
2234	96.7788
2232	96.7666
2230	96.7754
2228	96.7755
2226	96.7785
2224	96.778
2222	96.7831
2220	96.7986
2218	96.8097
2216	96.8207
2214	96.8367
2212	96.8304
2210	96.8287
2208	96.834
2206	96.833
2204	96.8234
2202	96.8296
2200	96.8308
2198	96.8413
2196	96.8491
2194	96.8468
2192	96.8403
2190	96.8332
2188	96.819
2186	96.8239
2184	96.8334
2182	96.8726
2180	96.9105
2178	96.9275
2176	96.9357
2174	96.9298
2172	96.8957
2170	96.8883
2168	96.8566
2166	96.819
2164	96.8026
2162	96.8357
2160	97.0464
2158	97.3782
2156	97.4159
2154	97.2994
2152	97.1935
2150	97.1558
2148	97.1844
2146	97.2218
2144	97.206
2142	97.1761
2140	97.1596
2138	97.1632
2136	97.1776
2134	97.2081
2132	97.1881
2130	97.15
2128	97.1132
2126	97.0757
2124	97.0425
2122	97.023
2120	96.9955
2118	96.9733
2116	96.9411
2114	96.9232
2112	96.9277
2110	96.9366
2108	96.9299
2106	96.9391
2104	96.9613
2102	96.9674
2100	96.9631
2098	96.9877
2096	97.0246
2094	97.0456
2092	97.0177
2090	96.9871
2088	96.9746
2086	96.9816
2084	96.9796
2082	96.9831
2080	96.977
2078	96.9733
2076	96.9732
2074	96.9966
2072	97.0091
2070	97.0125
2068	97.0208
2066	97.0385
2064	97.0356
2062	97.0477
2060	97.0752
2058	97.0935
2056	97.0634
2054	97.0471
2052	96.9718
2050	96.9549
2048	97.0418
2046	97.1027
2044	97.1011
2042	97.1116
2040	97.12
2038	97.0974
2036	97.114
2034	97.2108
2032	97.2314
2030	97.2418
2028	97.2634
2026	97.3047
2024	97.298
2022	97.2913
2020	97.264
2018	97.2526
2016	97.2683
2014	97.2931
2012	97.2678
2010	97.2496
2008	97.2831
2006	97.3631
2004	97.3817
2002	97.3525
2000	97.2932
1998	97.2777
1996	97.2649
1994	97.2609
1992	97.223
1990	97.2085
1988	97.2008
1986	97.2004
1984	97.1539
1982	97.0953
1980	97.0503
1978	97.1965
1976	97.3266
1974	97.4028
1972	97.4362
1970	97.4421
1968	97.4124
1966	97.4291
1964	97.4149
1962	97.414
1960	97.4184
1958	97.4235
1956	97.398
1954	97.3895
1952	97.3624
1950	97.3643
1948	97.3551
1946	97.353
1944	97.3304
1942	97.3625
1940	97.381
1938	97.3735
1936	97.3684
1934	97.3642
1932	97.3657
1930	97.3837
1928	97.3921
1926	97.4033
1924	97.3619
1922	97.3598
1920	97.3555
1918	97.3713
1916	97.3918
1914	97.3697
1912	97.3535
1910	97.3429
1908	97.3535
1906	97.3757
1904	97.3833
1902	97.3889
1900	97.3783
1898	97.3743
1896	97.3683
1894	97.3921
1892	97.3886
1890	97.3876
1888	97.4184
1886	97.4058
1884	97.3961
1882	97.4088
1880	97.4099
1878	97.4205
1876	97.4238
1874	97.439
1872	97.4466
1870	97.4367
1868	97.4544
1866	97.4663
1864	97.4461
1862	97.4474
1860	97.4531
1858	97.4602
1856	97.4611
1854	97.468
1852	97.4721
1850	97.463
1848	97.469
1846	97.4804
1844	97.5256
1842	97.5559
1840	97.4825
1838	97.4701
1836	97.4788
1834	97.51
1832	97.5105
1830	97.5267
1828	97.5668
1826	97.5203
1824	97.5154
1822	97.4996
1820	97.494
1818	97.5235
1816	97.5468
1814	97.5379
1812	97.4955
1810	97.4997
1808	97.5001
1806	97.5123
1804	97.5124
1802	97.4946
1800	97.5087
1798	97.5125
1796	97.4945
1794	97.5063
1792	97.5451
1790	97.5697
1788	97.5177
1786	97.5069
1784	97.5268
1782	97.5051
1780	97.4933
1778	97.5159
1776	97.5126
1774	97.5051
1772	97.5805
1770	97.6095
1768	97.5066
1766	97.5227
1764	97.476
1762	97.4555
1760	97.417
1758	97.2787
1756	97.1729
1754	97.0173
1752	96.7654
1750	96.5665
1748	96.3311
1746	96.1447
1744	95.9978
1742	95.9712
1740	95.9522
1738	95.9977
1736	95.9237
1734	95.9688
1732	96.0446
1730	95.9999
1728	96.0241
1726	96.0336
1724	95.9991
1722	96.035
1720	96.0275
1718	95.9401
1716	95.8962
1714	95.8215
1712	95.6484
1710	95.4521
1708	95.2175
1706	94.8086
1704	94.3351
1702	93.831
1700	92.805
1698	91.5938
1696	90.225
1694	88.9455
1692	87.7836
1690	86.485
1688	85.2284
1686	84.1952
1684	82.5608
1682	81.0515
1680	79.9171
1678	78.991
1676	77.9477
1674	76.5934
1672	75.5321
1670	74.3276
1668	72.8662
1666	71.8336
1664	70.8622
1662	69.5135
1660	68.31
1658	67.4413
1656	66.911
1654	66.2738
1652	64.9474
1650	64.6682
1648	64.6988
1646	64.5211
1644	64.5089
1642	64.718
1640	65.0206
1638	65.3659
1636	65.6239
1634	65.7063
1632	65.9868
1630	66.4636
1628	66.9728
1626	67.4803
1624	68.0746
1622	68.6666
1620	69.3214
1618	70.092
1616	70.9139
1614	71.6803
1612	72.571
1610	73.5741
1608	74.6187
1606	75.6894
1604	76.7788
1602	77.8749
1600	78.9705
1598	80.0073
1596	80.9889
1594	81.9142
1592	82.7813
1590	83.5649
1588	84.2497
1586	84.8103
1584	85.2714
1582	85.6382
1580	85.9366
1578	86.0795
1576	86.0735
1574	86.0391
1572	85.9912
1570	85.7813
1568	85.3343
1566	84.8935
1564	84.4142
1562	84.0964
1560	83.6739
1558	81.9771
1556	80.8611
1554	79.8129
1552	78.7666
1550	77.6716
1548	76.7003
1546	76.0339
1544	75.3705
1542	74.8734
1540	74.1544
1538	73.6825
1536	73.7383
1534	73.8349
1532	73.7677
1530	73.9058
1528	74.1622
1526	74.3888
1524	74.6745
1522	74.8928
1520	74.978
1518	75.1294
1516	75.3401
1514	75.7892
1512	76.4701
1510	77.2178
1508	77.9641
1506	78.9092
1504	79.7032
1502	80.4648
1500	81.3587
1498	82.2039
1496	83.1066
1494	84.0366
1492	84.9211
1490	85.7948
1488	86.5485
1486	87.1701
1484	87.6457
1482	87.9749
1480	88.1806
1478	88.2852
1476	88.1991
1474	87.8792
1472	87.2311
1470	86.6225
1468	86.1744
1466	85.7627
1464	85.1551
1462	84.6242
1460	84.2031
1458	83.4417
1456	82.1847
1454	81.5506
1452	81.2321
1450	81.0665
1448	80.9152
1446	80.8344
1444	80.8785
1442	81.0082
1440	81.2183
1438	81.5376
1436	81.7718
1434	82.013
1432	82.3832
1430	82.7469
1428	82.9949
1426	83.1779
1424	83.2507
1422	83.3066
1420	83.3227
1418	83.0992
1416	82.987
1414	83.0514
1412	83.1689
1410	83.353
1408	83.6167
1406	83.9122
1404	84.2174
1402	84.5751
1400	84.9286
1398	85.1867
1396	85.3566
1394	85.5129
1392	85.7437
1390	85.9941
1388	86.1625
1386	86.3
1384	86.5397
1382	86.8357
1380	87.1137
1378	87.3728
1376	87.6182
1374	87.7903
1372	87.8977
1370	87.9272
1368	87.9495
1366	88.047
1364	88.1436
1362	88.1456
1360	88.1451
1358	88.1452
1356	88.1405
1354	88.1276
1352	88.1213
1350	88.0924
1348	88.0626
1346	88.0427
1344	88.0438
1342	88.0429
1340	88.0163
1338	88.0494
1336	88.1513
1334	88.2333
1332	88.2725
1330	88.2563
1328	88.1974
1326	88.0977
1324	87.9693
1322	87.8176
1320	87.6522
1318	87.4974
1316	87.3821
1314	87.2826
1312	87.2213
1310	87.1956
1308	87.1806
1306	87.1703
1304	87.1666
1302	87.168
1300	87.1847
1298	87.1997
1296	87.2061
1294	87.1942
1292	87.1549
1290	87.0853
1288	87.0102
1286	86.9477
1284	86.9015
1282	86.8699
1280	86.8613
1278	86.8644
1276	86.8771
1274	86.8801
1272	86.8665
1270	86.8415
1268	86.8187
1266	86.7926
1264	86.7673
1262	86.7297
1260	86.6785
1258	86.6165
1256	86.534
1254	86.4214
1252	86.2873
1250	86.1297
1248	85.9819
1246	85.8503
1244	85.7145
1242	85.595
1240	85.5759
1238	85.6237
1236	85.6938
1234	85.8104
1232	85.9868
1230	86.2289
1228	86.5195
1226	86.8369
1224	87.1738
1222	87.5067
1220	87.8124
1218	88.0723
1216	88.2726
1214	88.3941
1212	88.4463
1210	88.4507
1208	88.4354
1206	88.4304
1204	88.4605
1202	88.5294
1200	88.6254
1198	88.7282
1196	88.8296
1194	88.9102
1192	88.9647
1190	89.0037
1188	89.05
1186	89.1157
1184	89.203
1182	89.2882
1180	89.3591
1178	89.4033
1176	89.4234
1174	89.4338
1172	89.4727
1170	89.552
1168	89.6499
1166	89.7176
1164	89.7494
1162	89.766
1160	89.7922
1158	89.8332
1156	89.9056
1154	90.0079
1152	90.1324
1150	90.2586
1148	90.3693
1146	90.4493
1144	90.4894
1142	90.4794
1140	90.4316
1138	90.3524
1136	90.2665
1134	90.189
1132	90.1297
1130	90.0886
1128	90.0797
1126	90.1124
1124	90.187
1122	90.2794
1120	90.3817
1118	90.4846
1116	90.5778
1114	90.6493
1112	90.6792
1110	90.6517
1108	90.5801
1106	90.4757
1104	90.3634
1102	90.257
1100	90.1646
1098	90.0779
1096	90.0013
1094	89.923
1092	89.8107
1090	89.6408
1088	89.4556
1086	89.2555
1084	89.0342
1082	88.8133
1080	88.6252
1078	88.4972
1076	88.4352
1074	88.429
1072	88.4802
1070	88.5437
1068	88.5193
1066	88.5203
1064	88.6987
1062	88.8869
1060	88.9501
1058	88.9507
1056	89.0337
1054	89.1506
1052	89.2651
1050	89.4065
1048	89.5789
1046	89.7867
1044	90.0417
1042	90.3197
1040	90.6032
1038	90.879
1036	91.1901
1034	91.4867
1032	91.7458
1030	91.9626
1028	92.1536
1026	92.453
1024	92.7951
1022	93.0574
1020	93.2726
1018	93.4588
1016	93.6386
1014	93.8228
1012	94.0149
1010	94.2093
1008	94.4175
1006	94.6203
1004	94.8052
1002	94.9686
1000	95.1221
998	95.2446
996	95.3419
994	95.4137
992	95.4763
990	95.5399
988	95.6119
986	95.6803
984	95.7675
982	95.8593
980	95.9488
978	96.0366
976	96.1344
974	96.2224
972	96.316
970	96.4143
968	96.5137
966	96.6029
964	96.6866
962	96.7544
960	96.8234
958	96.8861
956	96.9443
954	96.9993
952	97.06
950	97.107
948	97.1553
946	97.1979
944	97.2314
942	97.238
940	97.2211
938	97.189
936	97.1574
934	97.1268
932	97.1192
930	97.1077
928	97.0699
926	96.9974
924	96.9205
922	96.8693
920	96.8806
918	96.9385
916	97.0232
914	97.1145
912	97.2091
910	97.29
908	97.3715
906	97.4414
904	97.5024
902	97.5456
900	97.5794
898	97.5934
896	97.5899
894	97.5565
892	97.5185
890	97.4963
888	97.4621
886	97.3948
884	97.3316
882	97.2657
880	97.1998
878	97.181
876	97.2041
874	97.217
872	97.2468
870	97.288
868	97.3379
866	97.3825
864	97.4348
862	97.4749
860	97.4957
858	97.508
856	97.5307
854	97.5326
852	97.5371
850	97.5516
848	97.5771
846	97.5955
844	97.6093
842	97.6098
840	97.5996
838	97.5649
836	97.5368
834	97.5244
832	97.5171
830	97.511
828	97.5382
826	97.5671
824	97.589
822	97.5811
820	97.5548
818	97.5283
816	97.5108
814	97.468
812	97.4147
810	97.3817
808	97.3707
806	97.3511
804	97.3585
802	97.3831
800	97.4259
798	97.4827
796	97.5179
794	97.5135
792	97.5264
790	97.54
788	97.5462
786	97.5281
784	97.5201
782	97.521
780	97.5316
778	97.5487
776	97.5677
774	97.5622
772	97.5454
770	97.5144
768	97.4711
766	97.4103
764	97.3676
762	97.3276
760	97.2961
758	97.2472
756	97.1863
754	97.1155
752	97.0564
750	96.9945
748	96.9494
746	96.9309
744	96.9408
742	96.9585
740	96.9854
738	97.0078
736	97.0388
734	97.0508
732	97.0211
730	96.9479
728	96.8627
726	96.7362
724	96.6318
722	96.5447
720	96.4177
718	96.2982
716	96.1842
714	96.0273
712	95.805
710	95.4981
708	95.1428
706	94.7587
704	94.4199
702	94.1905
700	94.109
698	94.1621
696	94.3233
694	94.4945
692	94.6185
690	94.6638
688	94.6676
686	94.6734
684	94.6735
682	94.5952
680	94.5046
678	94.412
676	94.2955
674	94.1666
672	94.2485
670	94.7921
668	95.1879
666	94.3314
664	93.7981
662	93.6085
660	93.6045
658	93.6036
656	93.5437
654	93.5023
652	93.4672
650	93.4628
648	93.3888
646	93.3729
644	93.3725
642	93.3377
640	93.2807
638	93.2234
636	93.0814
634	92.9504
632	92.825
630	92.7088
628	92.5658
626	92.4574
624	92.3242
622	92.1965
620	92.0399
618	91.9226
616	91.7809
614	91.7519
612	91.7359
610	91.6887
608	91.6396
606	91.6289
604	91.5608
602	91.5775
600	91.6358
598	91.7019
596	91.7497
594	91.78
592	91.8262
590	91.9027
588	91.8452
586	91.7926
584	91.7191
582	91.6391
580	91.5059
578	91.4477
576	91.4368
574	91.6717
572	91.6399
570	91.6703
568	91.8166
566	91.9746
564	91.9905
562	92.0495
560	91.8887
558	91.8732
556	91.8933
554	92
552	91.938
550	91.9837
548	92.1714
546	92.5152
544	92.7505
542	92.8901
540	92.8686
538	93.2288
536	93.4734
534	93.6348
532	93.8659
530	94.0395
528	94.0521
526	94.1758
524	94.4794
522	94.9766
520	95.0939
518	95.0098
516	95.2073
514	96.1024
512	96.7521
510	96.4231
508	96.2446
506	97.212
504	96.5655
502	96.3739
500	97.9688
