# Supplementary material for: Microparticles from Wheat-Gluten Proteins Soluble in Ethanol by Nanoprecipitation: Preparation, Characterization, and Their Study as a Prolonged-Release Fertilizer
Source: Hindawi journal article supplement (doi:10.1155/2018/1042798), 2018-10-11
Supplement: f4 [file 1042798.f4.xlsx]

## Sheet: Hoja1
Wavenumber (cm-1)	%T
500	44.1427
501	43.9839
502	43.8911
503	44.1517
504	44.8196
505	45.3605
506	45.5105
507	45.6008
508	45.8167
509	45.8352
510	45.5193
511	45.2078
512	45.1612
513	45.2077
514	45.1359
515	45.1028
516	45.2411
517	45.3824
518	45.4267
519	45.5356
520	45.7231
521	45.7014
522	45.3516
523	44.9525
524	44.7687
525	44.7102
526	44.6083
527	44.5172
528	44.4885
529	44.3949
530	44.1862
531	44.0204
532	43.9886
533	43.9659
534	43.8957
535	43.9507
536	44.2228
537	44.5364
538	44.7431
539	44.9273
540	45.1609
541	45.3339
542	45.3955
543	45.4949
544	45.7004
545	45.8459
546	45.8291
547	45.8081
548	45.9159
549	46.0118
550	45.9336
551	45.774
552	45.6992
553	45.6924
554	45.6703
555	45.6794
556	45.7898
557	45.9574
558	46.1606
559	46.5131
560	47.0776
561	47.7283
562	48.3274
563	48.8689
564	49.3424
565	49.6446
566	49.7345
567	49.7053
568	49.6142
569	49.3965
570	49.0421
571	48.7039
572	48.5217
573	48.4725
574	48.4982
575	48.6281
576	48.8744
577	49.1797
578	49.578
579	50.2269
580	51.1722
581	52.2455
582	53.2862
583	54.2879
584	55.2562
585	56.1156
586	56.8281
587	57.4539
588	58.0283
589	58.5025
590	58.8476
591	59.1158
592	59.3626
593	59.595
594	59.8241
595	60.0785
596	60.3409
597	60.5547
598	60.714
599	60.8703
600	61.0406
601	61.1895
602	61.3131
603	61.4511
604	61.6037
605	61.7214
606	61.7961
607	61.8791
608	61.9874
609	62.0719
610	62.1055
611	62.1297
612	62.1771
613	62.222
614	62.2416
615	62.2598
616	62.2964
617	62.3328
618	62.3599
619	62.4066
620	62.488
621	62.5755
622	62.6416
623	62.6911
624	62.7337
625	62.7717
626	62.8258
627	62.9237
628	63.0543
629	63.1758
630	63.2774
631	63.3885
632	63.5235
633	63.6622
634	63.7908
635	63.9175
636	64.0436
637	64.1625
638	64.2882
639	64.4408
640	64.6053
641	64.7494
642	64.8778
643	65.0238
644	65.1918
645	65.3579
646	65.5202
647	65.6987
648	65.8898
649	66.0708
650	66.2468
651	66.4423
652	66.6526
653	66.8546
654	67.0582
655	67.2927
656	67.5498
657	67.7928
658	68.0143
659	68.2363
660	68.4664
661	68.701
662	68.9452
663	69.1793
664	69.3308
665	69.3762
666	69.4334
667	69.7498
668	70.4119
669	71.0344
670	71.3072
671	71.3847
672	71.4729
673	71.6334
674	71.8413
675	72.0623
676	72.2854
677	72.4989
678	72.6982
679	72.8963
680	73.1047
681	73.3107
682	73.4989
683	73.6747
684	73.848
685	74.0169
686	74.1801
687	74.3462
688	74.5147
689	74.6693
690	74.8012
691	74.9202
692	75.0354
693	75.1444
694	75.2469
695	75.3497
696	75.4507
697	75.5383
698	75.6115
699	75.685
700	75.7688
701	75.8607
702	75.9596
703	76.0703
704	76.1913
705	76.3156
706	76.4442
707	76.5829
708	76.7254
709	76.8561
710	76.9697
711	77.073
712	77.1687
713	77.2546
714	77.3365
715	77.424
716	77.5154
717	77.6017
718	77.6856
719	77.7794
720	77.8845
721	77.989
722	78.0866
723	78.1818
724	78.2758
725	78.3641
726	78.4465
727	78.5292
728	78.6154
729	78.7045
730	78.7955
731	78.8826
732	78.9534
733	79.0031
734	79.0441
735	79.0895
736	79.1352
737	79.1701
738	79.1949
739	79.2193
740	79.247
741	79.28
742	79.3252
743	79.3844
744	79.4442
745	79.4921
746	79.5344
747	79.5847
748	79.6439
749	79.7064
750	79.7762
751	79.8598
752	79.9515
753	80.0421
754	80.1359
755	80.2429
756	80.3595
757	80.4737
758	80.5841
759	80.6976
760	80.8151
761	80.9338
762	81.0577
763	81.191
764	81.3248
765	81.4456
766	81.5495
767	81.6389
768	81.7111
769	81.7629
770	81.7981
771	81.8174
772	81.8083
773	81.7591
774	81.6734
775	81.5604
776	81.4176
777	81.2364
778	81.0167
779	80.7642
780	80.4841
781	80.1922
782	79.9276
783	79.7414
784	79.6719
785	79.7322
786	79.911
787	80.1773
788	80.4915
789	80.8203
790	81.1391
791	81.4206
792	81.6398
793	81.8027
794	81.9521
795	82.1328
796	82.3593
797	82.6239
798	82.9155
799	83.2162
800	83.4978
801	83.7432
802	83.9604
803	84.1636
804	84.352
805	84.521
806	84.6769
807	84.8247
808	84.9572
809	85.0711
810	85.1788
811	85.2907
812	85.3983
813	85.4919
814	85.5785
815	85.6664
816	85.7462
817	85.8042
818	85.8434
819	85.8742
820	85.8964
821	85.9056
822	85.9062
823	85.9013
824	85.8822
825	85.8421
826	85.7894
827	85.7364
828	85.6847
829	85.6339
830	85.59
831	85.5506
832	85.4938
833	85.3949
834	85.2421
835	85.0262
836	84.7359
837	84.3844
838	84.0344
839	83.7818
840	83.712
841	83.8664
842	84.2259
843	84.7109
844	85.2106
845	85.6391
846	85.9686
847	86.2105
848	86.3821
849	86.502
850	86.5939
851	86.6732
852	86.7384
853	86.7852
854	86.8203
855	86.849
856	86.8665
857	86.871
858	86.8723
859	86.8754
860	86.8716
861	86.8557
862	86.8381
863	86.8274
864	86.8173
865	86.8017
866	86.7874
867	86.7802
868	86.7734
869	86.7621
870	86.754
871	86.7535
872	86.751
873	86.7392
874	86.7258
875	86.7173
876	86.7064
877	86.6879
878	86.6702
879	86.6601
880	86.6503
881	86.6344
882	86.6194
883	86.6107
884	86.6011
885	86.5855
886	86.5716
887	86.5637
888	86.5511
889	86.5252
890	86.493
891	86.4624
892	86.4295
893	86.391
894	86.3554
895	86.3276
896	86.2971
897	86.2538
898	86.2022
899	86.1505
900	86.0969
901	86.0391
902	85.9818
903	85.9262
904	85.864
905	85.7924
906	85.7211
907	85.656
908	85.59
909	85.5192
910	85.4514
911	85.3898
912	85.3221
913	85.2384
914	85.1454
915	85.0533
916	84.9599
917	84.8615
918	84.7636
919	84.6706
920	84.5768
921	84.4781
922	84.3833
923	84.3004
924	84.2237
925	84.1446
926	84.0644
927	83.9867
928	83.9052
929	83.8135
930	83.7157
931	83.6179
932	83.5154
933	83.3996
934	83.2686
935	83.1203
936	82.9411
937	82.7103
938	82.4047
939	81.9845
940	81.3876
941	80.5739
942	79.6134
943	78.7331
944	78.24
945	78.3324
946	78.9421
947	79.763
948	80.4535
949	80.831
950	80.9067
951	80.7895
952	80.6001
953	80.4533
954	80.4476
955	80.627
956	80.9606
957	81.3763
958	81.803
959	82.185
960	82.4834
961	82.6896
962	82.823
963	82.9059
964	82.947
965	82.9539
966	82.9415
967	82.9177
968	82.8775
969	82.8204
970	82.7585
971	82.7002
972	82.6395
973	82.5711
974	82.4998
975	82.4283
976	82.3497
977	82.2616
978	82.173
979	82.0884
980	81.9997
981	81.9014
982	81.7985
983	81.6932
984	81.5777
985	81.449
986	81.3161
987	81.1827
988	81.0381
989	80.875
990	80.6999
991	80.5186
992	80.3242
993	80.1114
994	79.8904
995	79.676
996	79.4743
997	79.2876
998	79.1231
999	78.9914
1000	78.9079
1001	78.8976
1002	78.9818
1003	79.1487
1004	79.3524
1005	79.5494
1006	79.7248
1007	79.8782
1008	80.0012
1009	80.0838
1010	80.125
1011	80.1248
1012	80.0798
1013	79.9972
1014	79.8997
1015	79.8029
1016	79.7034
1017	79.5948
1018	79.4834
1019	79.3756
1020	79.2661
1021	79.1504
1022	79.0343
1023	78.9199
1024	78.7957
1025	78.6537
1026	78.5032
1027	78.3561
1028	78.2113
1029	78.0638
1030	77.9169
1031	77.7727
1032	77.6241
1033	77.4671
1034	77.3094
1035	77.1569
1036	77.0025
1037	76.8393
1038	76.6715
1039	76.503
1040	76.3262
1041	76.1351
1042	75.9362
1043	75.7357
1044	75.5284
1045	75.3079
1046	75.077
1047	74.8357
1048	74.5713
1049	74.272
1050	73.9377
1051	73.5712
1052	73.1741
1053	72.7693
1054	72.4145
1055	72.1792
1056	72.1034
1057	72.1779
1058	72.3522
1059	72.549
1060	72.6919
1061	72.739
1062	72.6928
1063	72.5725
1064	72.3913
1065	72.1594
1066	71.8931
1067	71.601
1068	71.272
1069	70.8904
1070	70.451
1071	69.9506
1072	69.3778
1073	68.7211
1074	67.9808
1075	67.1582
1076	66.25
1077	65.2688
1078	64.2787
1079	63.4042
1080	62.8148
1081	62.6902
1082	63.1563
1083	64.2248
1084	65.7552
1085	67.5022
1086	69.2123
1087	70.6967
1088	71.8586
1089	72.6911
1090	73.2514
1091	73.6089
1092	73.8157
1093	73.908
1094	73.9213
1095	73.8813
1096	73.7935
1097	73.6595
1098	73.4882
1099	73.2872
1100	73.0527
1101	72.7784
1102	72.4669
1103	72.1181
1104	71.7213
1105	71.2675
1106	70.7596
1107	70.2023
1108	69.5908
1109	68.9229
1110	68.2127
1111	67.4875
1112	66.7803
1113	66.1378
1114	65.6248
1115	65.3061
1116	65.2307
1117	65.4245
1118	65.8938
1119	66.6151
1120	67.5235
1121	68.5357
1122	69.575
1123	70.5764
1124	71.4811
1125	72.2477
1126	72.8625
1127	73.3275
1128	73.6438
1129	73.8163
1130	73.8655
1131	73.8094
1132	73.653
1133	73.405
1134	73.0963
1135	72.7769
1136	72.4958
1137	72.2891
1138	72.1688
1139	72.1101
1140	72.0618
1141	71.9832
1142	71.8674
1143	71.7264
1144	71.5684
1145	71.4004
1146	71.2378
1147	71.0945
1148	70.9724
1149	70.872
1150	70.8034
1151	70.7768
1152	70.7907
1153	70.8385
1154	70.9211
1155	71.0378
1156	71.1777
1157	71.3306
1158	71.4972
1159	71.6791
1160	71.8664
1161	72.0494
1162	72.2302
1163	72.4128
1164	72.5915
1165	72.7617
1166	72.93
1167	73.1018
1168	73.2707
1169	73.4325
1170	73.5978
1171	73.7797
1172	73.9796
1173	74.1964
1174	74.4378
1175	74.7085
1176	74.9999
1177	75.3042
1178	75.6258
1179	75.9669
1180	76.3157
1181	76.66
1182	77.0025
1183	77.3472
1184	77.6862
1185	78.0117
1186	78.3284
1187	78.6393
1188	78.9363
1189	79.2142
1190	79.4824
1191	79.7479
1192	80.0017
1193	80.2354
1194	80.4551
1195	80.6662
1196	80.8616
1197	81.0364
1198	81.2
1199	81.359
1200	81.5058
1201	81.6357
1202	81.7594
1203	81.8857
1204	82.0084
1205	82.1226
1206	82.2369
1207	82.3568
1208	82.4732
1209	82.5794
1210	82.6828
1211	82.7877
1212	82.8824
1213	82.9577
1214	83.0201
1215	83.0746
1216	83.1132
1217	83.1309
1218	83.1376
1219	83.1393
1220	83.1266
1221	83.0942
1222	83.0525
1223	83.0093
1224	82.9571
1225	82.8908
1226	82.8202
1227	82.7512
1228	82.6741
1229	82.5827
1230	82.487
1231	82.3944
1232	82.2967
1233	82.1879
1234	82.0773
1235	81.9722
1236	81.8678
1237	81.7626
1238	81.6659
1239	81.5749
1240	81.4641
1241	81.3077
1242	81.0939
1243	80.8129
1244	80.4619
1245	80.0902
1246	79.8126
1247	79.7504
1248	79.9511
1249	80.3658
1250	80.8889
1251	81.4062
1252	81.8344
1253	82.1502
1254	82.3799
1255	82.5547
1256	82.685
1257	82.7786
1258	82.8538
1259	82.9225
1260	82.979
1261	83.0196
1262	83.0548
1263	83.0885
1264	83.1084
1265	83.108
1266	83.097
1267	83.0791
1268	83.0378
1269	82.9589
1270	82.8415
1271	82.6798
1272	82.4587
1273	82.1898
1274	81.9312
1275	81.7581
1276	81.7201
1277	81.8268
1278	82.0484
1279	82.3197
1280	82.5661
1281	82.7498
1282	82.8791
1283	82.9707
1284	83.028
1285	83.0608
1286	83.093
1287	83.1346
1288	83.1685
1289	83.1802
1290	83.1782
1291	83.1716
1292	83.1545
1293	83.1254
1294	83.0992
1295	83.0818
1296	83.0586
1297	83.0194
1298	82.9744
1299	82.9311
1300	82.8809
1301	82.8216
1302	82.7669
1303	82.7218
1304	82.6712
1305	82.6092
1306	82.5509
1307	82.503
1308	82.45
1309	82.3844
1310	82.3243
1311	82.2834
1312	82.2518
1313	82.2176
1314	82.1851
1315	82.1545
1316	82.1127
1317	82.0573
1318	82.0056
1319	81.9645
1320	81.9201
1321	81.8667
1322	81.8166
1323	81.7709
1324	81.711
1325	81.6317
1326	81.5509
1327	81.4745
1328	81.3831
1329	81.2696
1330	81.1514
1331	81.0304
1332	80.8823
1333	80.6983
1334	80.4988
1335	80.2922
1336	80.0521
1337	79.7347
1338	79.2688
1339	78.5473
1340	77.5588
1341	76.5688
1342	76.0281
1343	76.224
1344	77.0592
1345	78.139
1346	79.0624
1347	79.6541
1348	79.9556
1349	80.0829
1350	80.1287
1351	80.1346
1352	80.1002
1353	80.0119
1354	79.8629
1355	79.6414
1356	79.3371
1357	78.9731
1358	78.6396
1359	78.4643
1360	78.5418
1361	78.8809
1362	79.3804
1363	79.8516
1364	80.1285
1365	80.1747
1366	80.0754
1367	79.9437
1368	79.8299
1369	79.7201
1370	79.5979
1371	79.4713
1372	79.3575
1373	79.2642
1374	79.172
1375	79.047
1376	78.8854
1377	78.7143
1378	78.567
1379	78.4401
1380	78.2965
1381	78.1247
1382	77.946
1383	77.7647
1384	77.5713
1385	77.3992
1386	77.3089
1387	77.2959
1388	77.2543
1389	77.0886
1390	76.8086
1391	76.4917
1392	76.2174
1393	76.0391
1394	75.9599
1395	75.8921
1396	75.732
1397	75.4942
1398	75.2824
1399	75.1283
1400	74.9372
1401	74.6297
1402	74.2658
1403	73.9715
1404	73.7877
1405	73.6478
1406	73.4818
1407	73.2757
1408	73.0348
1409	72.7869
1410	72.5772
1411	72.4081
1412	72.2342
1413	72.0112
1414	71.7461
1415	71.4727
1416	71.2188
1417	71.0357
1418	71.0019
1419	71.0786
1420	71.0268
1421	70.6806
1422	70.17
1423	69.7297
1424	69.4014
1425	69.0641
1426	68.6456
1427	68.1864
1428	67.736
1429	67.2948
1430	66.846
1431	66.3517
1432	65.7452
1433	65.0043
1434	64.2575
1435	63.7304
1436	63.5238
1437	63.3884
1438	62.936
1439	62.1332
1440	61.2326
1441	60.4393
1442	59.78
1443	59.1786
1444	58.5586
1445	57.924
1446	57.3538
1447	56.9131
1448	56.5506
1449	56.1397
1450	55.6434
1451	55.1202
1452	54.6184
1453	54.1181
1454	53.656
1455	53.4799
1456	53.9988
1457	55.2192
1458	56.3466
1459	56.8371
1460	56.8757
1461	56.7423
1462	56.6443
1463	56.7942
1464	57.3579
1465	58.2556
1466	59.1612
1467	59.872
1468	60.4403
1469	61.0229
1470	61.7886
1471	62.9364
1472	64.5839
1473	66.4547
1474	68.067
1475	69.3178
1476	70.4023
1477	71.3974
1478	72.2099
1479	72.8324
1480	73.4504
1481	74.1909
1482	74.9694
1483	75.6573
1484	76.249
1485	76.786
1486	77.2564
1487	77.657
1488	78.0449
1489	78.4756
1490	78.8661
1491	79.0911
1492	79.1113
1493	78.9338
1494	78.6386
1495	78.3511
1496	78.157
1497	78.0256
1498	77.8859
1499	77.7318
1500	77.5477
1501	77.2386
1502	76.7396
1503	76.1014
1504	75.449
1505	74.9375
1506	74.6659
1507	74.4299
1508	74.1487
1509	74.0466
1510	73.8732
1511	73.4882
1512	72.9916
1513	72.4156
1514	71.7916
1515	71.224
1516	70.7815
1517	70.3474
1518	69.8116
1519	69.2676
1520	68.8701
1521	68.6198
1522	68.2861
1523	67.7934
1524	67.3295
1525	66.9774
1526	66.6852
1527	66.3551
1528	65.9127
1529	65.3286
1530	64.6359
1531	63.9712
1532	63.5273
1533	63.3336
1534	63.0998
1535	62.5314
1536	61.634
1537	60.5987
1538	59.7172
1539	59.2834
1540	59.2534
1541	59.2685
1542	59.2556
1543	59.2194
1544	59.1293
1545	58.9573
1546	58.5933
1547	58.0322
1548	57.4512
1549	57.0244
1550	56.7044
1551	56.3067
1552	55.7784
1553	55.2213
1554	54.665
1555	53.97
1556	53.091
1557	52.3401
1558	52.3826
1559	53.2986
1560	53.8808
1561	53.5546
1562	52.6414
1563	51.7286
1564	51.1102
1565	50.6528
1566	50.1715
1567	49.6842
1568	49.3833
1569	49.4058
1570	49.5701
1571	49.4936
1572	49.0058
1573	48.2944
1574	47.7479
1575	47.7487
1576	48.3169
1577	48.9334
1578	49.2084
1579	49.2281
1580	49.1899
1581	49.2027
1582	49.274
1583	49.3619
1584	49.4328
1585	49.4825
1586	49.524
1587	49.5695
1588	49.627
1589	49.7152
1590	49.8424
1591	49.999
1592	50.1803
1593	50.4018
1594	50.6801
1595	51.0009
1596	51.324
1597	51.6184
1598	51.8787
1599	52.109
1600	52.3155
1601	52.5119
1602	52.7146
1603	52.914
1604	53.0729
1605	53.1723
1606	53.2313
1607	53.2703
1608	53.272
1609	53.213
1610	53.0881
1611	52.8467
1612	52.403
1613	51.748
1614	51.0211
1615	50.4566
1616	50.214
1617	50.1244
1618	49.8249
1619	49.2144
1620	48.4579
1621	47.8043
1622	47.467
1623	47.454
1624	47.5218
1625	47.4807
1626	47.4161
1627	47.5346
1628	47.9221
1629	48.4351
1630	48.8513
1631	49.0616
1632	49.1231
1633	49.2426
1634	49.7528
1635	50.9281
1636	52.4668
1637	53.6688
1638	54.3959
1639	54.9765
1640	55.6504
1641	56.4245
1642	57.1535
1643	57.7733
1644	58.3941
1645	59.2265
1646	60.401
1647	61.6385
1648	62.4599
1649	62.7293
1650	62.5939
1651	62.4128
1652	62.9056
1653	64.5084
1654	66.1992
1655	67.208
1656	67.8365
1657	68.2899
1658	68.7049
1659	69.1505
1660	69.6468
1661	70.2228
1662	70.8712
1663	71.5019
1664	71.967
1665	72.2098
1666	72.2924
1667	72.3495
1668	72.5248
1669	72.825
1670	73.0765
1671	73.1523
1672	73.1163
1673	73.1069
1674	73.2606
1675	73.606
1676	73.9547
1677	74.1094
1678	74.1169
1679	74.1241
1680	74.1854
1681	74.2843
1682	74.4612
1683	74.863
1684	75.4866
1685	75.9883
1686	76.3104
1687	76.6474
1688	77.0684
1689	77.5563
1690	77.9909
1691	78.3225
1692	78.6093
1693	78.9376
1694	79.3949
1695	80.0809
1696	80.9146
1697	81.6607
1698	82.4188
1699	83.4842
1700	84.9903
1701	86.5632
1702	87.6411
1703	88.2572
1704	88.7647
1705	89.3075
1706	89.8348
1707	90.3548
1708	90.9316
1709	91.5001
1710	91.9635
1711	92.3449
1712	92.7209
1713	93.102
1714	93.4144
1715	93.5952
1716	93.6722
1717	93.7014
1718	93.7417
1719	93.9779
1720	94.4922
1721	95.0275
1722	95.3549
1723	95.5098
1724	95.6296
1725	95.772
1726	95.9017
1727	96.0122
1728	96.1373
1729	96.2579
1730	96.2947
1731	96.3095
1732	96.2752
1733	96.4576
1734	96.6301
1735	96.6934
1736	96.7571
1737	96.7787
1738	96.7904
1739	96.8062
1740	96.8717
1741	96.9491
1742	97.008
1743	97.0207
1744	97.0971
1745	97.0107
1746	96.9719
1747	96.9916
1748	96.9734
1749	97.0126
1750	97.0877
1751	97.2074
1752	97.3351
1753	97.457
1754	97.5643
1755	97.6703
1756	97.7671
1757	97.808
1758	97.8131
1759	97.823
1760	97.9031
1761	97.8492
1762	97.827
1763	97.864
1764	97.8753
1765	97.9101
1766	97.9221
1767	97.9298
1768	97.952
1769	97.988
1770	98.0065
1771	98.0114
1772	98.0385
1773	98.084
1774	98.107
1775	98.1072
1776	98.1179
1777	98.1405
1778	98.1501
1779	98.148
1780	98.1617
1781	98.1915
1782	98.2087
1783	98.212
1784	98.2281
1785	98.2574
1786	98.2715
1787	98.2678
1788	98.2717
1789	98.2861
1790	98.2886
1791	98.2792
1792	98.2874
1793	98.3151
1794	98.3302
1795	98.3302
1796	98.3415
1797	98.365
1798	98.376
1799	98.3721
1800	98.3788
1801	98.3997
1802	98.4104
1803	98.4093
1804	98.4194
1805	98.4414
1806	98.4503
1807	98.4493
1808	98.4557
1809	98.4616
1810	98.4293
1811	98.3655
1812	98.3427
1813	98.399
1814	98.4875
1815	98.5586
1816	98.6183
1817	98.6676
1818	98.685
1819	98.669
1820	98.6352
1821	98.6238
1822	98.6113
1823	98.6653
1824	98.6188
1825	98.5914
1826	98.6259
1827	98.6105
1828	98.6193
1829	98.6351
1830	98.6484
1831	98.648
1832	98.6594
1833	98.6807
1834	98.6881
1835	98.6817
1836	98.6862
1837	98.7033
1838	98.7084
1839	98.6998
1840	98.7033
1841	98.7216
1842	98.7295
1843	98.7226
1844	98.7281
1845	98.7493
1846	98.7585
1847	98.7511
1848	98.7586
1849	98.7743
1850	98.7956
1851	98.7949
1852	98.7936
1853	98.8053
1854	98.7968
1855	98.7873
1856	98.794
1857	98.8125
1858	98.8168
1859	98.8077
1860	98.8145
1861	98.838
1862	98.8504
1863	98.8458
1864	98.8462
1865	98.8527
1866	98.8375
1867	98.7868
1868	98.7179
1869	98.6586
1870	98.6482
1871	98.7102
1872	98.8065
1873	98.8723
1874	98.8785
1875	98.852
1876	98.8423
1877	98.8572
1878	98.8641
1879	98.8562
1880	98.8602
1881	98.8751
1882	98.8733
1883	98.8563
1884	98.8513
1885	98.866
1886	98.8871
1887	98.9143
1888	98.9533
1889	98.9743
1890	98.9433
1891	98.8998
1892	98.9078
1893	98.9466
1894	98.9459
1895	98.8945
1896	98.8523
1897	98.8605
1898	98.8928
1899	98.9157
1900	98.9338
1901	98.949
1902	98.9417
1903	98.9198
1904	98.9157
1905	98.9331
1906	98.9441
1907	98.936
1908	98.9263
1909	98.9151
1910	98.8821
1911	98.8499
1912	98.858
1913	98.8945
1914	98.9215
1915	98.9423
1916	98.9875
1917	99.0319
1918	99.0151
1919	98.9569
1920	98.9422
1921	98.9776
1922	98.9818
1923	98.9265
1924	98.8811
1925	98.8997
1926	98.9422
1927	98.9561
1928	98.9536
1929	98.9568
1930	98.9507
1931	98.9359
1932	98.9391
1933	98.9585
1934	98.9604
1935	98.9427
1936	98.9466
1937	98.9722
1938	98.977
1939	98.9623
1940	98.9728
1941	99.0048
1942	98.9957
1943	98.9338
1944	98.8893
1945	98.8943
1946	98.899
1947	98.8798
1948	98.8769
1949	98.9035
1950	98.9175
1951	98.9083
1952	98.9192
1953	98.9599
1954	98.9822
1955	98.9742
1956	98.9883
1957	99.039
1958	99.0739
1959	99.0727
1960	99.0784
1961	99.1036
1962	99.1031
1963	99.0748
1964	99.0763
1965	99.1148
1966	99.1244
1967	99.0849
1968	99.0595
1969	99.0774
1970	99.0875
1971	99.0667
1972	99.0586
1973	99.0752
1974	99.0708
1975	99.0394
1976	99.0217
1977	98.9997
1978	98.9081
1979	98.773
1980	98.6996
1981	98.7131
1982	98.7439
1983	98.7574
1984	98.7835
1985	98.8232
1986	98.8297
1987	98.8012
1988	98.7964
1989	98.8347
1990	98.8691
1991	98.8732
1992	98.8733
1993	98.878
1994	98.8615
1995	98.8294
1996	98.8206
1997	98.8355
1998	98.8359
1999	98.8243
2000	98.8454
2001	98.8994
2002	98.9356
2003	98.9441
2004	98.9647
2005	98.9979
2006	98.9888
2007	98.9282
2008	98.8776
2009	98.8605
2010	98.8387
2011	98.8078
2012	98.8161
2013	98.8667
2014	98.9018
2015	98.9004
2016	98.9018
2017	98.9179
2018	98.9173
2019	98.9066
2020	98.928
2021	98.9712
2022	98.9827
2023	98.9635
2024	98.9594
2025	98.9614
2026	98.9216
2027	98.8639
2028	98.8633
2029	98.9125
2030	98.9256
2031	98.8793
2032	98.8366
2033	98.821
2034	98.7857
2035	98.7206
2036	98.677
2037	98.6712
2038	98.6662
2039	98.6549
2040	98.6662
2041	98.6878
2042	98.6732
2043	98.6294
2044	98.6112
2045	98.6253
2046	98.6207
2047	98.5733
2048	98.5081
2049	98.4411
2050	98.3771
2051	98.3514
2052	98.3967
2053	98.4775
2054	98.5224
2055	98.5167
2056	98.5054
2057	98.5111
2058	98.5124
2059	98.503
2060	98.5062
2061	98.5223
2062	98.5214
2063	98.4994
2064	98.486
2065	98.4911
2066	98.4933
2067	98.4872
2068	98.4915
2069	98.5046
2070	98.504
2071	98.4915
2072	98.4928
2073	98.5075
2074	98.5084
2075	98.4923
2076	98.4846
2077	98.4905
2078	98.4878
2079	98.4711
2080	98.4604
2081	98.4608
2082	98.4567
2083	98.4481
2084	98.4521
2085	98.4662
2086	98.4683
2087	98.4585
2088	98.4616
2089	98.484
2090	98.5074
2091	98.5263
2092	98.5534
2093	98.5833
2094	98.5895
2095	98.5663
2096	98.5374
2097	98.5163
2098	98.4943
2099	98.4735
2100	98.4713
2101	98.4852
2102	98.4907
2103	98.4806
2104	98.4716
2105	98.4689
2106	98.4581
2107	98.4387
2108	98.4293
2109	98.4346
2110	98.4389
2111	98.4368
2112	98.4382
2113	98.4417
2114	98.4354
2115	98.4255
2116	98.4331
2117	98.458
2118	98.4792
2119	98.4907
2120	98.5064
2121	98.527
2122	98.5369
2123	98.5367
2124	98.5455
2125	98.5658
2126	98.5799
2127	98.5866
2128	98.6057
2129	98.6408
2130	98.672
2131	98.6917
2132	98.7111
2133	98.7254
2134	98.7114
2135	98.6722
2136	98.6417
2137	98.6312
2138	98.6185
2139	98.5979
2140	98.5941
2141	98.6125
2142	98.6262
2143	98.6254
2144	98.6316
2145	98.6494
2146	98.6545
2147	98.642
2148	98.6368
2149	98.6452
2150	98.6493
2151	98.6585
2152	98.7056
2153	98.7822
2154	98.8387
2155	98.8629
2156	98.8884
2157	98.9042
2158	98.8358
2159	98.6589
2160	98.4576
2161	98.3152
2162	98.2353
2163	98.1964
2164	98.1896
2165	98.1872
2166	98.1556
2167	98.1116
2168	98.1053
2169	98.143
2170	98.1827
2171	98.2034
2172	98.2199
2173	98.2293
2174	98.2053
2175	98.155
2176	98.1224
2177	98.125
2178	98.1377
2179	98.1455
2180	98.1561
2181	98.1578
2182	98.1214
2183	98.0558
2184	98.0065
2185	97.9896
2186	97.979
2187	97.9608
2188	97.9489
2189	97.9452
2190	97.9348
2191	97.9242
2192	97.9359
2193	97.9613
2194	97.966
2195	97.9459
2196	97.9326
2197	97.9403
2198	97.9506
2199	97.9547
2200	97.9649
2201	97.9803
2202	97.9836
2203	97.9763
2204	97.9786
2205	97.9897
2206	97.9874
2207	97.9708
2208	97.962
2209	97.965
2210	97.9618
2211	97.9519
2212	97.9558
2213	97.9734
2214	97.9796
2215	97.9666
2216	97.9546
2217	97.9541
2218	97.9539
2219	97.9501
2220	97.9547
2221	97.9679
2222	97.9746
2223	97.9731
2224	97.977
2225	97.9858
2226	97.9848
2227	97.9752
2228	97.9734
2229	97.9791
2230	97.9753
2231	97.9619
2232	97.9561
2233	97.9604
2234	97.9588
2235	97.9495
2236	97.9501
2237	97.9659
2238	97.981
2239	97.9864
2240	97.9896
2241	97.9939
2242	97.9929
2243	97.9889
2244	97.9917
2245	97.9973
2246	97.9921
2247	97.9792
2248	97.9771
2249	97.9896
2250	98.0014
2251	98.0045
2252	98.0054
2253	98.0053
2254	97.9966
2255	97.9822
2256	97.9744
2257	97.9751
2258	97.9751
2259	97.9754
2260	97.986
2261	98.0041
2262	98.0143
2263	98.0124
2264	98.0077
2265	98.0029
2266	97.9921
2267	97.9795
2268	97.9774
2269	97.9847
2270	97.9866
2271	97.9784
2272	97.9692
2273	97.963
2274	97.9541
2275	97.9432
2276	97.9388
2277	97.9404
2278	97.939
2279	97.9345
2280	97.9348
2281	97.9382
2282	97.9329
2283	97.9154
2284	97.8955
2285	97.8805
2286	97.8699
2287	97.8653
2288	97.8708
2289	97.8822
2290	97.8897
2291	97.8926
2292	97.8992
2293	97.9122
2294	97.9245
2295	97.9323
2296	97.9391
2297	97.9456
2298	97.9477
2299	97.9463
2300	97.9466
2301	97.9484
2302	97.9463
2303	97.9411
2304	97.9399
2305	97.9447
2306	97.9496
2307	97.9521
2308	97.9545
2309	97.9562
2310	97.9525
2311	97.9449
2312	97.9397
2313	97.9364
2314	97.9277
2315	97.9129
2316	97.8992
2317	97.8891
2318	97.8772
2319	97.8631
2320	97.8512
2321	97.8412
2322	97.8269
2323	97.8132
2324	97.8167
2325	97.8468
2326	97.895
2327	97.9454
2328	97.9878
2329	98.0173
2330	98.0325
2331	98.0388
2332	98.0436
2333	98.0483
2334	98.0482
2335	98.0448
2336	98.0445
2337	98.0493
2338	98.0547
2339	98.0591
2340	98.0653
2341	98.0734
2342	98.0801
2343	98.0893
2344	98.1093
2345	98.1384
2346	98.161
2347	98.1642
2348	98.1546
2349	98.1453
2350	98.1424
2351	98.1455
2352	98.1531
2353	98.16
2354	98.1598
2355	98.1552
2356	98.155
2357	98.1602
2358	98.1654
2359	98.1703
2360	98.1787
2361	98.1873
2362	98.1904
2363	98.1911
2364	98.1989
2365	98.2141
2366	98.2261
2367	98.2286
2368	98.2243
2369	98.2162
2370	98.2053
2371	98.1965
2372	98.1958
2373	98.2018
2374	98.2087
2375	98.2157
2376	98.2253
2377	98.2347
2378	98.2381
2379	98.2353
2380	98.2306
2381	98.2241
2382	98.2127
2383	98.1978
2384	98.1856
2385	98.1774
2386	98.1698
2387	98.1619
2388	98.1575
2389	98.1576
2390	98.1588
2391	98.1596
2392	98.1619
2393	98.165
2394	98.165
2395	98.1611
2396	98.1565
2397	98.1534
2398	98.1509
2399	98.1498
2400	98.1513
2401	98.1528
2402	98.151
2403	98.1483
2404	98.1496
2405	98.1524
2406	98.1486
2407	98.136
2408	98.1204
2409	98.1071
2410	98.097
2411	98.0913
2412	98.0923
2413	98.0974
2414	98.1007
2415	98.1007
2416	98.0998
2417	98.0976
2418	98.091
2419	98.0826
2420	98.0787
2421	98.0805
2422	98.0824
2423	98.0815
2424	98.0797
2425	98.0774
2426	98.0719
2427	98.0639
2428	98.057
2429	98.0515
2430	98.0443
2431	98.0366
2432	98.033
2433	98.0324
2434	98.0294
2435	98.0224
2436	98.0155
2437	98.0104
2438	98.0041
2439	97.9966
2440	97.9911
2441	97.9872
2442	97.9812
2443	97.9727
2444	97.965
2445	97.9575
2446	97.9463
2447	97.9325
2448	97.9214
2449	97.9145
2450	97.9085
2451	97.9034
2452	97.902
2453	97.9024
2454	97.8987
2455	97.8911
2456	97.8857
2457	97.885
2458	97.885
2459	97.884
2460	97.8848
2461	97.8874
2462	97.8877
2463	97.884
2464	97.8794
2465	97.8756
2466	97.8715
2467	97.8684
2468	97.8699
2469	97.8753
2470	97.8794
2471	97.8797
2472	97.8784
2473	97.8763
2474	97.8718
2475	97.8671
2476	97.8673
2477	97.8727
2478	97.879
2479	97.8845
2480	97.8909
2481	97.8975
2482	97.9009
2483	97.902
2484	97.9054
2485	97.9109
2486	97.914
2487	97.9138
2488	97.9146
2489	97.9175
2490	97.9191
2491	97.9178
2492	97.9164
2493	97.9158
2494	97.9136
2495	97.9101
2496	97.9088
2497	97.9104
2498	97.9125
[truncated: 1,502 more rows]
