# Supplementary material for: Microparticles from Wheat-Gluten Proteins Soluble in Ethanol by Nanoprecipitation: Preparation, Characterization, and Their Study as a Prolonged-Release Fertilizer
Source: Hindawi journal article supplement (doi:10.1155/2018/1042798), 2018-10-11
Supplement: f7 [file 1042798.f7.xlsx]

## Sheet: Hoja1
Time (h)	Urea release (%)
0	0
0.5	52.4
1	56.66
2	58.08
4	63.31
6	65.62
8	73.33
10	80.02
12	88
14	88
16	88
