# Supplementary material for: Microparticles from Wheat-Gluten Proteins Soluble in Ethanol by Nanoprecipitation: Preparation, Characterization, and Their Study as a Prolonged-Release Fertilizer
Source: Hindawi journal article supplement (doi:10.1155/2018/1042798), 2018-10-11
Supplement: f9 [file 1042798.f9.xlsx]

## Sheet: Hoja1
Microspheres loaded with urea		Microspheres without urea		Wheat-Gluten Proteins Soluble in Ethanol (WGPSE)		Urea
Temperature (°C)	Weight % (%)	Temperature (°C)	Weight % (%)	Temperature (°C)	Weight % (%)	Temperature (°C)	Weight % (%)
16.68	100.044	15.7	100	15.71	99.943	23.54	100.055
16.74	100.048	15.71	100.004	15.72	99.943	23.88	100.09
16.8	100.052	15.72	100.008	15.73	99.943	24.28	100.098
16.86	100.052	15.74	100.008	15.75	99.947	24.72	100.09
16.92	100.055	15.75	100.008	15.76	99.943	25.17	100.102
16.99	100.06	15.77	100.012	15.78	99.943	25.64	100.11
17.06	100.064	15.79	100.015	15.8	99.947	26.1	100.098
17.13	100.067	15.81	100.015	15.82	99.947	26.55	100.098
17.21	100.067	15.84	100.015	15.85	99.947	26.98	100.106
17.28	100.071	15.87	100.015	15.87	99.947	27.39	100.094
17.36	100.071	15.9	100.019	15.9	99.947	27.77	100.086
17.44	100.076	15.93	100.019	15.93	99.947	28.13	100.098
17.52	100.076	15.96	100.023	15.96	99.947	28.47	100.09
17.61	100.079	15.99	100.027	16	99.947	28.78	100.079
17.69	100.079	16.03	100.027	16.03	99.947	29.08	100.086
17.78	100.083	16.06	100.027	16.07	99.951	29.35	100.086
17.86	100.087	16.1	100.027	16.1	99.947	29.61	100.075
17.95	100.083	16.14	100.031	16.14	99.947	29.84	100.079
18.04	100.087	16.18	100.027	16.18	99.947	30.06	100.082
18.13	100.091	16.22	100.027	16.22	99.947	30.27	100.071
18.22	100.091	16.27	100.027	16.27	99.947	30.46	100.071
18.31	100.091	16.31	100.031	16.31	99.947	30.64	100.075
18.4	100.091	16.35	100.031	16.35	99.943	30.81	100.071
18.49	100.091	16.39	100.034	16.39	99.943	30.97	100.067
18.58	100.091	16.44	100.034	16.44	99.943	31.12	100.071
18.67	100.091	16.48	100.034	16.48	99.94	31.26	100.067
18.76	100.095	16.52	100.034	16.52	99.943	31.4	100.063
18.85	100.095	16.57	100.034	16.57	99.94	31.52	100.063
18.94	100.095	16.61	100.034	16.61	99.94	31.64	100.063
19.03	100.095	16.65	100.034	16.65	99.94	31.75	100.055
19.12	100.095	16.7	100.034	16.7	99.94	31.86	100.055
19.2	100.095	16.74	100.034	16.74	99.94	31.96	100.059
19.29	100.099	16.78	100.034	16.78	99.936	32.06	100.051
19.38	100.095	16.82	100.034	16.82	99.936	32.15	100.051
19.46	100.095	16.87	100.034	16.86	99.936	32.23	100.055
19.55	100.095	16.91	100.034	16.9	99.936	32.31	100.055
19.63	100.095	16.95	100.034	16.94	99.933	32.39	100.051
19.72	100.095	16.99	100.034	16.98	99.933	32.46	100.051
19.8	100.095	17.03	100.034	17.02	99.933	32.53	100.055
19.88	100.095	17.07	100.034	17.06	99.933	32.59	100.051
19.96	100.095	17.11	100.034	17.1	99.929	32.66	100.051
20.04	100.095	17.15	100.034	17.14	99.929	32.72	100.051
20.12	100.091	17.19	100.034	17.18	99.925	32.77	100.047
20.2	100.095	17.23	100.034	17.22	99.925	32.83	100.047
20.27	100.095	17.26	100.034	17.26	99.922	32.88	100.047
20.35	100.091	17.3	100.034	17.3	99.922	32.93	100.047
20.42	100.095	17.34	100.031	17.33	99.922	32.98	100.047
20.5	100.091	17.38	100.031	17.37	99.918	33.02	100.047
20.57	100.091	17.41	100.031	17.41	99.918	33.07	100.043
20.64	100.091	17.45	100.031	17.44	99.914	33.11	100.039
20.71	100.091	17.48	100.027	17.48	99.914	33.15	100.039
20.78	100.091	17.52	100.027	17.52	99.914	33.19	100.043
20.84	100.091	17.56	100.027	17.55	99.911	33.23	100.039
20.91	100.091	17.59	100.027	17.58	99.907	33.26	100.035
20.98	100.091	17.62	100.027	17.62	99.907	33.29	100.039
21.04	100.087	17.66	100.027	17.65	99.907	33.33	100.039
21.1	100.087	17.69	100.027	17.68	99.903	33.36	100.039
21.17	100.083	17.72	100.027	17.72	99.903	33.39	100.039
21.23	100.083	17.75	100.027	17.75	99.903	33.42	100.039
21.29	100.083	17.79	100.027	17.78	99.903	33.45	100.035
21.35	100.083	17.82	100.027	17.81	99.9	33.48	100.035
21.41	100.083	17.85	100.027	17.84	99.896	33.5	100.039
21.46	100.083	17.88	100.027	17.87	99.896	33.53	100.039
21.52	100.083	17.91	100.027	17.91	99.892	33.56	100.039
21.57	100.083	17.94	100.027	17.93	99.892	33.6	100.039
21.63	100.083	17.97	100.027	17.97	99.889	33.63	100.039
21.69	100.083	18	100.027	17.99	99.889	33.67	100.043
21.74	100.079	18.03	100.027	18.02	99.885	33.72	100.043
21.79	100.079	18.06	100.027	18.05	99.885	33.77	100.047
21.84	100.076	18.08	100.023	18.08	99.881	33.83	100.047
21.89	100.076	18.11	100.023	18.11	99.881	33.89	100.047
21.94	100.076	18.14	100.023	18.13	99.878	33.96	100.047
21.99	100.076	18.16	100.023	18.16	99.878	34.04	100.047
22.04	100.071	18.19	100.023	18.19	99.878	34.12	100.051
22.09	100.076	18.22	100.023	18.21	99.874	34.21	100.051
22.13	100.071	18.24	100.023	18.24	99.874	34.3	100.051
22.18	100.071	18.27	100.023	18.26	99.87	34.4	100.051
22.22	100.071	18.29	100.023	18.29	99.87	34.51	100.055
22.27	100.067	18.32	100.023	18.31	99.87	34.61	100.055
22.31	100.067	18.34	100.023	18.34	99.867	34.72	100.059
22.35	100.067	18.36	100.023	18.36	99.867	34.84	100.059
22.39	100.067	18.39	100.023	18.39	99.867	34.95	100.059
22.43	100.067	18.41	100.019	18.41	99.863	35.08	100.059
22.48	100.067	18.43	100.023	18.43	99.863	35.2	100.063
22.52	100.067	18.46	100.023	18.45	99.863	35.33	100.063
22.56	100.067	18.48	100.023	18.48	99.859	35.46	100.067
22.6	100.064	18.5	100.019	18.5	99.856	35.59	100.067
22.63	100.064	18.52	100.019	18.52	99.856	35.72	100.067
22.67	100.064	18.54	100.019	18.54	99.856	35.86	100.071
22.71	100.064	18.56	100.019	18.56	99.852	35.99	100.071
22.75	100.064	18.58	100.023	18.59	99.852	36.13	100.067
22.78	100.064	18.61	100.019	18.61	99.849	36.27	100.067
22.82	100.064	18.63	100.019	18.63	99.845	36.42	100.067
22.85	100.06	18.65	100.019	18.65	99.845	36.56	100.071
22.89	100.06	18.67	100.019	18.67	99.845	36.71	100.075
22.92	100.06	18.69	100.019	18.69	99.841	36.85	100.075
22.95	100.06	18.7	100.015	18.71	99.838	37	100.079
22.99	100.06	18.72	100.015	18.73	99.838	37.15	100.075
23.02	100.06	18.74	100.015	18.75	99.838	37.31	100.079
23.05	100.06	18.76	100.015	18.77	99.834	37.46	100.079
23.08	100.06	18.78	100.015	18.78	99.83	37.61	100.079
23.11	100.06	18.8	100.015	18.8	99.83	37.77	100.082
23.14	100.055	18.81	100.015	18.82	99.83	37.92	100.082
23.17	100.055	18.83	100.015	18.84	99.827	38.08	100.082
23.2	100.055	18.85	100.015	18.86	99.827	38.23	100.086
23.23	100.055	18.87	100.015	18.88	99.823	38.39	100.086
23.26	100.055	18.88	100.019	18.89	99.82	38.54	100.086
23.29	100.052	18.9	100.015	18.91	99.816	38.7	100.086
23.32	100.052	18.92	100.015	18.92	99.82	38.86	100.086
23.34	100.052	18.93	100.015	18.94	99.816	39.01	100.09
23.37	100.048	18.95	100.015	18.96	99.812	39.17	100.09
23.4	100.052	18.97	100.015	18.98	99.812	39.33	100.094
23.43	100.048	18.98	100.015	18.99	99.812	39.49	100.094
23.45	100.052	19	100.012	19.01	99.809	39.65	100.094
23.48	100.052	19.01	100.012	19.02	99.809	39.81	100.094
23.5	100.048	19.03	100.012	19.04	99.809	39.97	100.098
23.53	100.048	19.04	100.012	19.05	99.805	40.13	100.098
23.55	100.044	19.06	100.008	19.07	99.801	40.29	100.094
23.58	100.044	19.07	100.012	19.09	99.801	40.45	100.098
23.6	100.044	19.09	100.008	19.1	99.801	40.62	100.098
23.62	100.044	19.1	100.012	19.12	99.798	40.78	100.098
23.65	100.044	19.12	100.008	19.13	99.798	40.95	100.098
23.67	100.044	19.13	100.008	19.14	99.798	41.11	100.102
23.69	100.044	19.14	100.008	19.16	99.794	41.27	100.102
23.72	100.04	19.16	100.008	19.17	99.79	41.44	100.106
23.74	100.04	19.17	100.008	19.19	99.79	41.6	100.106
23.76	100.04	19.18	100.008	19.2	99.79	41.77	100.106
23.78	100.036	19.2	100.008	19.21	99.787	41.93	100.106
23.8	100.04	19.21	100.004	19.23	99.787	42.1	100.106
23.82	100.04	19.22	100.004	19.24	99.783	42.26	100.106
23.84	100.036	19.24	100.004	19.25	99.779	42.43	100.11
23.87	100.036	19.25	100.008	19.27	99.779	42.59	100.11
23.89	100.036	19.26	100.004	19.28	99.779	42.76	100.11
23.91	100.032	19.28	100.004	19.29	99.779	42.93	100.11
23.93	100.032	19.29	100.004	19.31	99.776	43.09	100.114
23.95	100.028	19.3	100.004	19.32	99.776	43.26	100.11
23.97	100.028	19.31	100.004	19.33	99.776	43.43	100.114
23.98	100.028	19.32	100.004	19.34	99.772	43.59	100.118
24	100.028	19.34	100.004	19.35	99.772	43.76	100.114
24.02	100.028	19.35	100	19.37	99.768	43.93	100.118
24.04	100.028	19.36	100	19.38	99.765	44.09	100.118
24.06	100.024	19.37	100	19.39	99.765	44.26	100.118
24.08	100.028	19.38	100	19.4	99.765	44.43	100.118
24.09	100.024	19.4	100	19.41	99.757	44.6	100.118
24.11	100.024	19.41	100	19.42	99.757	44.77	100.118
24.13	100.024	19.42	100	19.43	99.757	44.93	100.118
24.15	100.024	19.43	100	19.44	99.757	45.1	100.122
24.16	100.024	19.44	100	19.45	99.754	45.27	100.122
24.18	100.024	19.45	100	19.46	99.75	45.44	100.122
24.2	100.024	19.46	100	19.48	99.75	45.61	100.122
24.22	100.024	19.47	99.996	19.48	99.75	45.77	100.122
24.23	100.02	19.48	99.996	19.5	99.746	45.94	100.126
24.25	100.02	19.49	99.996	19.5	99.746	46.11	100.126
24.27	100.02	19.5	99.996	19.52	99.746	46.28	100.126
24.28	100.016	19.51	99.996	19.53	99.743	46.45	100.13
24.3	100.016	19.52	99.996	19.54	99.743	46.62	100.13
24.31	100.016	19.53	99.996	19.55	99.743	46.79	100.133
24.33	100.016	19.54	99.996	19.55	99.739	46.95	100.13
24.34	100.016	19.55	99.996	19.56	99.736	47.12	100.13
24.36	100.012	19.55	99.992	19.57	99.736	47.29	100.13
24.37	100.012	19.56	99.992	19.58	99.736	47.46	100.13
24.39	100.012	19.57	99.996	19.59	99.732	47.63	100.133
24.4	100.012	19.58	99.996	19.6	99.728	47.79	100.13
24.42	100.012	19.59	99.996	19.61	99.728	47.96	100.133
24.43	100.008	19.6	99.996	19.62	99.725	48.13	100.133
24.44	100.008	19.61	99.996	19.63	99.725	48.3	100.133
24.46	100.008	19.62	99.996	19.64	99.725	48.47	100.133
24.47	100.008	19.62	99.992	19.64	99.721	48.63	100.133
24.49	100.008	19.63	99.992	19.65	99.721	48.8	100.133
24.5	100.008	19.64	99.992	19.66	99.717	48.97	100.133
24.51	100.004	19.65	99.988	19.67	99.717	49.14	100.137
24.53	100.004	19.66	99.992	19.68	99.714	49.31	100.137
24.54	100.004	19.66	99.992	19.69	99.714	49.48	100.133
24.55	100.004	19.67	99.988	19.69	99.714	49.65	100.137
24.57	100	19.68	99.988	19.7	99.714	49.81	100.141
24.58	100	19.68	99.988	19.71	99.71	49.98	100.137
24.59	100	19.69	99.988	19.72	99.706	50.15	100.141
24.61	100	19.7	99.988	19.73	99.706	50.32	100.141
24.62	99.996	19.71	99.985	19.73	99.706	50.49	100.141
24.63	99.996	19.71	99.985	19.74	99.703	50.66	100.141
24.64	99.996	19.72	99.985	19.75	99.703	50.83	100.145
24.65	99.996	19.73	99.985	19.76	99.703	51	100.145
24.67	99.996	19.73	99.985	19.76	99.699	51.17	100.145
24.68	99.996	19.74	99.985	19.77	99.699	51.34	100.145
24.69	99.996	19.75	99.985	19.78	99.695	51.51	100.145
24.7	99.996	19.75	99.985	19.79	99.695	51.68	100.149
24.71	99.992	19.76	99.985	19.79	99.692	51.85	100.145
24.72	99.992	19.77	99.985	19.8	99.688	52.02	100.145
24.73	99.992	19.78	99.981	19.81	99.688	52.19	100.149
24.75	99.996	19.78	99.981	19.81	99.688	52.36	100.149
24.76	99.992	19.79	99.981	19.82	99.684	52.53	100.149
24.77	99.992	19.8	99.981	19.82	99.681	52.7	100.145
24.78	99.988	19.8	99.981	19.83	99.681	52.87	100.149
24.79	99.988	19.81	99.981	19.84	99.681	53.03	100.149
24.8	99.988	19.82	99.981	19.84	99.681	53.2	100.153
24.81	99.988	19.82	99.981	19.85	99.681	53.38	100.153
24.82	99.988	19.83	99.981	19.86	99.673	53.55	100.149
24.83	99.988	19.84	99.981	19.86	99.673	53.72	100.153
24.84	99.988	19.84	99.977	19.87	99.67	53.89	100.153
24.85	99.988	19.85	99.977	19.88	99.666	54.06	100.153
24.86	99.988	19.86	99.977	19.88	99.666	54.23	100.153
24.87	99.988	19.86	99.977	19.89	99.666	54.4	100.157
24.88	99.984	19.87	99.977	19.89	99.666	54.57	100.157
24.89	99.984	19.87	99.977	19.9	99.662	54.74	100.157
24.9	99.984	19.88	99.977	19.91	99.659	54.91	100.157
24.91	99.984	19.89	99.973	19.91	99.659	55.08	100.161
24.92	99.98	19.89	99.973	19.92	99.655	55.25	100.161
24.93	99.984	19.9	99.973	19.92	99.655	55.42	100.161
24.94	99.98	19.9	99.977	19.93	99.652	55.59	100.161
24.95	99.98	19.91	99.973	19.93	99.652	55.75	100.161
24.96	99.98	19.91	99.973	19.94	99.648	55.92	100.165
24.97	99.98	19.92	99.973	19.95	99.648	56.09	100.161
24.98	99.98	19.92	99.973	19.95	99.648	56.25	100.161
24.99	99.98	19.93	99.973	19.96	99.644	56.42	100.165
25	99.98	19.93	99.973	19.96	99.644	56.59	100.165
25	99.976	19.94	99.973	19.97	99.644	56.75	100.161
25.01	99.976	19.94	99.973	19.97	99.641	56.92	100.161
25.02	99.976	19.95	99.973	19.98	99.641	57.09	100.165
25.03	99.976	19.96	99.973	19.98	99.637	57.25	100.165
25.04	99.972	19.96	99.969	19.99	99.637	57.42	100.169
25.05	99.972	19.97	99.969	19.99	99.637	57.59	100.169
25.05	99.972	19.97	99.969	20	99.63	57.76	100.169
25.06	99.972	19.98	99.969	20	99.63	57.92	100.169
25.07	99.972	19.98	99.969	20.01	99.63	58.09	100.165
25.08	99.968	19.99	99.973	20.01	99.626	58.26	100.165
25.09	99.968	19.99	99.969	20.02	99.626	58.42	100.169
25.09	99.968	20	99.973	20.02	99.626	58.59	100.169
25.1	99.968	20	99.969	20.03	99.622	58.76	100.173
25.11	99.968	20.01	99.969	20.03	99.622	58.93	100.173
25.12	99.968	20.01	99.969	20.04	99.619	59.1	100.173
25.12	99.968	20.02	99.969	20.04	99.615	59.26	100.173
25.13	99.968	20.02	99.969	20.04	99.619	59.43	100.173
25.14	99.964	20.03	99.969	20.05	99.615	59.6	100.173
25.15	99.968	20.03	99.969	20.06	99.615	59.77	100.173
25.15	99.964	20.04	99.969	20.06	99.611	59.94	100.173
25.16	99.968	20.04	99.969	20.07	99.611	60.11	100.177
25.17	99.964	20.04	99.969	20.07	99.604	60.28	100.177
25.18	99.964	20.05	99.969	20.07	99.604	60.45	100.177
25.18	99.964	20.05	99.966	20.08	99.604	60.62	100.18
25.19	99.96	20.05	99.966	20.08	99.6	60.79	100.18
25.2	99.96	20.06	99.966	20.09	99.6	60.96	100.18
25.2	99.96	20.06	99.966	20.09	99.597	61.13	100.177
25.21	99.96	20.07	99.966	20.1	99.593	61.3	100.177
25.22	99.96	20.07	99.966	20.1	99.593	61.48	100.184
25.22	99.96	20.07	99.966	20.11	99.593	61.65	100.18
25.23	99.956	20.08	99.966	20.11	99.589	61.82	100.184
25.24	99.96	20.08	99.966	20.12	99.589	61.99	100.184
25.24	99.956	20.09	99.966	20.12	99.589	62.16	100.184
25.25	99.956	20.09	99.962	20.13	99.586	62.33	100.184
25.25	99.956	20.09	99.966	20.13	99.586	62.5	100.184
25.26	99.952	20.1	99.966	20.13	99.582	62.67	100.184
25.27	99.952	20.1	99.962	20.14	99.582	62.84	100.188
25.28	99.952	20.11	99.966	20.14	99.582	63.01	100.188
25.28	99.952	20.11	99.962	20.15	99.582	63.18	100.188
25.29	99.952	20.11	99.966	20.15	99.579	63.35	100.188
25.29	99.948	20.12	99.962	20.16	99.579	63.52	100.188
25.3	99.952	20.12	99.966	20.16	99.575	63.69	100.188
25.3	99.952	20.12	99.966	20.16	99.575	63.86	100.188
25.31	99.948	20.13	99.966	20.17	99.571	64.03	100.192
25.31	99.952	20.13	99.962	20.17	99.571	64.2	100.192
25.32	99.948	20.13	99.966	20.18	99.571	64.37	100.192
25.32	99.948	20.14	99.966	20.18	99.571	64.54	100.196
25.33	99.948	20.14	99.966	20.18	99.568	64.71	100.192
25.33	99.948	20.15	99.962	20.19	99.568	64.88	100.192
25.34	99.948	20.15	99.962	20.19	99.564	65.05	100.192
25.34	99.948	20.15	99.962	20.2	99.56	65.22	100.192
25.35	99.944	20.16	99.962	20.2	99.56	65.39	100.192
25.35	99.944	20.16	99.962	20.2	99.557	65.56	100.192
25.36	99.944	20.16	99.962	20.21	99.557	65.72	100.192
25.36	99.944	20.16	99.962	20.21	99.553	65.89	100.192
25.37	99.944	20.16	99.962	20.21	99.55	66.06	100.196
25.37	99.944	20.17	99.958	20.22	99.553	66.22	100.196
25.38	99.94	20.17	99.958	20.22	99.55	66.39	100.196
25.38	99.94	20.18	99.958	20.22	99.55	66.56	100.196
25.39	99.94	20.18	99.958	20.23	99.546	66.73	100.196
25.39	99.936	20.18	99.958	20.23	99.546	66.89	100.196
25.4	99.936	20.19	99.958	20.23	99.546	67.06	100.2
25.4	99.94	20.19	99.958	20.24	99.546	67.23	100.2
25.41	99.936	20.19	99.958	20.24	99.542	67.4	100.2
25.41	99.936	20.19	99.958	20.24	99.539	67.57	100.2
25.42	99.936	20.2	99.958	20.25	99.539	67.74	100.2
25.42	99.936	20.2	99.958	20.25	99.535	67.91	100.2
25.43	99.932	20.2	99.954	20.25	99.535	68.08	100.2
25.43	99.932	20.21	99.954	20.26	99.535	68.25	100.2
25.44	99.932	20.21	99.954	20.26	99.531	68.42	100.196
25.44	99.932	20.21	99.954	20.26	99.528	68.59	100.2
25.45	99.932	20.22	99.954	20.26	99.528	68.77	100.208
25.45	99.932	20.22	99.954	20.27	99.528	68.94	100.208
25.46	99.932	20.22	99.954	20.27	99.528	69.11	100.208
25.46	99.928	20.23	99.954	20.27	99.524	69.28	100.208
25.47	99.932	20.23	99.954	20.27	99.524	69.45	100.204
25.47	99.928	20.23	99.954	20.28	99.524	69.62	100.208
25.48	99.928	20.24	99.954	20.28	99.52	69.79	100.204
25.48	99.924	20.24	99.954	20.28	99.52	69.96	100.2
25.48	99.928	20.24	99.954	20.29	99.52	70.13	100.204
25.49	99.924	20.25	99.954	20.29	99.517	70.29	100.204
25.49	99.928	20.25	99.954	20.29	99.517	70.46	100.204
25.5	99.924	20.25	99.95	20.3	99.513	70.63	100.204
25.5	99.924	20.25	99.954	20.3	99.513	70.8	100.204
25.51	99.924	20.26	99.95	20.3	99.513	70.97	100.208
25.51	99.924	20.26	99.954	20.31	99.509	71.14	100.208
25.53	99.921	20.27	99.95	20.32	99.502	71.31	100.208
25.56	99.916	20.29	99.947	20.34	99.495	71.48	100.212
25.58	99.916	20.31	99.947	20.36	99.484	71.65	100.208
25.61	99.912	20.32	99.947	20.38	99.48	71.82	100.208
25.63	99.912	20.34	99.942	20.4	99.473	71.99	100.212
25.66	99.912	20.36	99.939	20.42	99.466	72.16	100.212
25.71	99.912	20.39	99.939	20.45	99.462	72.33	100.212
25.75	99.909	20.42	99.939	20.48	99.455	72.5	100.216
25.8	99.909	20.46	99.942	20.52	99.447	72.67	100.216
25.86	99.905	20.5	99.942	20.56	99.44	72.84	100.212
25.92	99.905	20.55	99.942	20.61	99.433	73.01	100.212
25.99	99.905	20.6	99.939	20.67	99.429	73.18	100.216
26.07	99.9	20.67	99.942	20.74	99.422	73.35	100.212
26.15	99.9	20.74	99.942	20.81	99.414	73.52	100.216
26.24	99.9	20.81	99.939	20.88	99.411	73.69	100.212
26.33	99.9	20.89	99.942	20.97	99.403	73.86	100.216
26.43	99.9	20.98	99.942	21.05	99.396	74.03	100.216
26.53	99.9	21.07	99.942	21.15	99.392	74.2	100.216
26.64	99.9	21.17	99.947	21.25	99.385	74.37	100.216
26.75	99.9	21.28	99.947	21.35	99.382	74.54	100.212
26.87	99.897	21.39	99.947	21.46	99.374	74.71	100.216
26.99	99.897	21.5	99.947	21.57	99.371	74.88	100.216
27.11	99.897	21.61	99.942	21.68	99.363	75.05	100.22
27.24	99.893	21.73	99.942	21.8	99.36	75.22	100.22
27.37	99.893	21.85	99.942	21.92	99.356	75.39	100.224
27.5	99.893	21.98	99.942	22.04	99.345	75.56	100.22
27.64	99.893	22.1	99.947	22.16	99.342	75.73	100.224
27.77	99.897	22.23	99.947	22.29	99.334	75.9	100.22
27.91	99.897	22.36	99.942	22.42	99.327	76.07	100.224
28.06	99.893	22.5	99.939	22.55	99.32	76.24	100.224
28.2	99.893	22.63	99.942	22.68	99.316	76.41	100.22
28.34	99.889	22.77	99.939	22.82	99.309	76.58	100.22
28.49	99.889	22.91	99.942	22.96	99.301	76.74	100.224
28.64	99.885	23.05	99.942	23.1	99.298	76.91	100.224
28.79	99.881	23.2	99.939	23.24	99.29	77.08	100.227
28.94	99.881	23.34	99.935	23.38	99.283	77.25	100.224
29.09	99.877	23.49	99.935	23.53	99.276	77.41	100.224
29.24	99.877	23.64	99.935	23.67	99.265	77.58	100.224
29.4	99.873	23.79	99.939	23.82	99.261	77.75	100.224
29.55	99.877	23.94	99.939	23.97	99.25	77.92	100.224
29.71	99.873	24.09	99.939	24.12	99.247	78.09	100.224
29.87	99.873	24.25	99.935	24.28	99.239	78.25	100.224
30.02	99.869	24.4	99.935	24.43	99.228	78.42	100.22
30.18	99.869	24.56	99.935	24.58	99.221	78.59	100.224
30.34	99.869	24.71	99.935	24.73	99.214	78.76	100.22
30.5	99.865	24.86	99.935	24.89	99.21	78.93	100.224
30.66	99.861	25.02	99.931	25.05	99.199	79.1	100.22
30.82	99.861	25.18	99.931	25.2	99.196	79.27	100.224
30.99	99.857	25.34	99.931	25.36	99.192	79.44	100.224
31.15	99.853	25.5	99.927	25.51	99.181	79.61	100.22
31.31	99.853	25.66	99.927	25.68	99.174	79.78	100.224
31.48	99.849	25.82	99.927	25.84	99.167	79.95	100.22
31.65	99.849	25.98	99.923	26	99.155	80.11	100.22
31.81	99.845	26.15	99.923	26.16	99.148	80.28	100.224
31.98	99.841	26.31	99.923	26.32	99.141	80.45	100.224
32.14	99.841	26.47	99.923	26.48	99.133	80.62	100.224
32.31	99.841	26.63	99.923	26.65	99.126	80.79	100.224
32.48	99.837	26.8	99.92	26.81	99.115	80.95	100.224
32.65	99.833	26.96	99.916	26.98	99.104	81.12	100.224
32.82	99.829	27.12	99.912	27.14	99.101	81.29	100.224
32.98	99.829	27.29	99.908	27.31	99.09	81.46	100.227
33.15	99.825	27.45	99.904	27.47	99.086	81.63	100.227
33.32	99.825	27.61	99.904	27.64	99.075	81.8	100.227
33.49	99.821	27.78	99.9	27.8	99.064	81.97	100.227
33.66	99.817	27.95	99.9	27.97	99.057	82.14	100.227
33.82	99.817	28.11	99.896	28.13	99.05	82.31	100.227
33.99	99.813	28.28	99.893	28.3	99.042	82.48	100.232
34.16	99.809	28.44	99.885	28.47	99.028	82.65	100.232
34.33	99.805	28.61	99.885	28.64	99.02	82.83	100.232
34.49	99.801	28.78	99.885	28.8	99.013	82.99	100.232
34.66	99.801	28.95	99.885	28.97	99.002	83.16	100.232
34.83	99.797	29.11	99.881	29.14	98.995	83.33	100.232
35	99.793	29.28	99.877	29.31	98.984	83.5	100.227
35.17	99.793	29.45	99.877	29.48	98.969	83.67	100.227
35.34	99.793	29.61	99.874	29.65	98.955	83.84	100.227
35.52	99.789	29.78	99.874	29.81	98.947	84.01	100.232
35.69	99.785	29.95	99.874	29.98	98.936	84.18	100.227
35.86	99.785	30.12	99.87	30.15	98.926	84.36	100.232
36.04	99.777	30.28	99.866	30.32	98.918	84.53	100.232
36.21	99.777	30.45	99.862	30.49	98.907	84.7	100.232
36.38	99.769	30.62	99.858	30.66	98.897	84.87	100.232
36.55	99.766	30.79	99.858	30.83	98.886	85.04	100.227
36.72	99.761	30.96	99.858	31	98.875	85.22	100.232
36.9	99.758	31.13	99.851	31.17	98.867	85.39	100.227
37.07	99.754	31.3	99.847	31.34	98.856	85.56	100.227
37.24	99.754	31.47	99.843	31.51	98.845	85.73	100.227
37.41	99.75	31.64	99.843	31.68	98.834	85.9	100.227
37.58	99.75	31.81	99.839	31.85	98.827	86.07	100.227
37.75	99.742	31.98	99.835	32.02	98.816	86.24	100.227
37.93	99.742	32.16	99.831	32.19	98.809	86.42	100.232
38.1	99.738	32.33	99.828	32.36	98.798	86.59	100.232
38.27	99.738	32.5	99.824	32.53	98.783	86.76	100.232
38.44	99.734	32.67	99.82	32.7	98.776	86.93	100.227
38.61	99.726	32.84	99.812	32.87	98.765	87.1	100.227
38.78	99.722	33.01	99.812	33.04	98.754	87.28	100.227
38.96	99.722	33.18	99.808	33.2	98.743	87.45	100.227
39.13	99.718	33.35	99.805	33.38	98.732	87.62	100.227
39.31	99.718	33.52	99.805	33.55	98.721	87.79	100.224
39.48	99.714	33.7	99.801	33.72	98.71	87.95	100.227
39.65	99.71	33.87	99.797	33.89	98.7	88.13	100.224
39.83	99.706	34.04	99.793	34.06	98.688	88.3	100.224
40.01	99.702	34.21	99.789	34.23	98.674	88.47	100.224
40.18	99.702	34.38	99.785	34.41	98.663	88.64	100.224
40.36	99.698	34.56	99.785	34.58	98.656	88.81	100.22
40.53	99.694	34.73	99.781	34.75	98.641	88.98	100.224
40.71	99.686	34.9	99.778	34.92	98.63	89.14	100.224
40.88	99.686	35.08	99.774	35.09	98.619	89.31	100.224
41.05	99.678	35.25	99.766	35.27	98.605	89.48	100.22
41.23	99.674	35.42	99.762	35.43	98.594	89.65	100.216
41.41	99.674	35.59	99.762	35.61	98.579	89.82	100.22
41.58	99.666	35.76	99.759	35.78	98.568	89.99	100.22
41.75	99.666	35.94	99.755	35.95	98.557	90.16	100.22
41.93	99.662	36.11	99.747	36.13	98.539	90.33	100.224
42.1	99.658	36.28	99.743	36.3	98.535	90.5	100.224
42.27	99.65	36.45	99.739	36.47	98.521	90.67	100.22
42.44	99.646	36.62	99.735	36.64	98.506	90.84	100.22
42.62	99.642	36.8	99.732	36.81	98.491	91.01	100.22
42.79	99.638	36.97	99.724	36.99	98.48	91.18	100.224
42.96	99.634	37.13	99.724	37.16	98.469	91.35	100.22
43.14	99.63	37.3	99.716	37.34	98.455	91.53	100.22
43.31	99.63	37.47	99.713	37.51	98.44	91.7	100.22
43.49	99.626	37.65	99.713	37.68	98.43	91.87	100.22
43.66	99.626	37.82	99.709	37.86	98.419	92.04	100.216
43.84	99.618	37.99	99.701	38.03	98.408	92.21	100.216
44.01	99.618	38.16	99.697	38.21	98.397	92.38	100.216
44.19	99.611	38.34	99.694	38.38	98.382	92.55	100.216
44.37	99.606	38.51	99.689	38.56	98.364	92.72	100.216
44.54	99.603	38.68	99.686	38.73	98.353	92.89	100.216
44.72	99.599	38.85	99.682	38.91	98.342	93.07	100.216
44.89	99.595	39.02	99.678	39.08	98.331	93.24	100.212
45.07	99.591	39.2	99.674	39.25	98.316	93.41	100.212
45.24	99.587	39.37	99.67	39.43	98.305	93.58	100.212
45.42	99.583	39.54	99.667	39.6	98.291	93.75	100.212
45.59	99.579	39.71	99.663	39.77	98.276	93.92	100.212
45.77	99.571	39.88	99.659	39.95	98.262	94.09	100.208
45.95	99.571	40.05	99.655	40.13	98.247	94.26	100.208
46.12	99.571	40.23	99.647	40.3	98.24	94.43	100.208
46.29	99.563	40.4	99.644	40.48	98.221	94.61	100.212
46.47	99.559	40.57	99.64	40.65	98.203	94.78	100.208
46.64	99.559	40.75	99.636	40.83	98.192	94.95	100.208
46.82	99.551	40.92	99.632	41	98.181	95.12	100.208
46.99	99.551	41.1	99.624	41.18	98.167	95.29	100.208
47.17	99.547	41.27	99.617	41.35	98.152	95.46	100.208
47.34	99.543	41.45	99.613	41.52	98.141	95.63	100.208
47.52	99.539	41.62	99.605	41.7	98.127	95.8	100.208
47.7	99.535	41.8	99.601	41.87	98.116	95.97	100.204
47.87	99.535	41.97	99.594	42.05	98.101	96.14	100.2
48.05	99.527	42.15	99.59	42.22	98.086	96.31	100.2
48.22	99.523	42.32	99.582	42.39	98.072	96.49	100.2
48.4	99.523	42.5	99.575	42.57	98.061	96.66	100.2
48.57	99.519	42.68	99.571	42.74	98.046	96.82	100.2
48.74	99.515	42.85	99.563	42.91	98.028	96.99	100.2
48.92	99.511	43.03	99.559	43.08	98.017	97.16	100.2
49.09	99.507	43.21	99.552	43.26	98.003	97.33	100.196
49.26	99.503	43.39	99.544	43.43	97.992	97.5	100.196
49.44	99.499	43.57	99.54	43.61	97.981	97.67	100.196
49.61	99.495	43.74	99.532	43.78	97.966	97.84	100.196
49.79	99.495	43.92	99.525	43.96	97.952	98.01	100.196
49.96	99.487	44.1	99.521	44.13	97.937	98.18	100.196
50.13	99.483	44.27	99.513	44.31	97.926	98.34	100.2
50.31	99.483	44.45	99.509	44.48	97.911	98.52	100.2
50.48	99.479	44.63	99.502	44.66	97.9	98.69	100.2
50.66	99.475	44.8	99.498	44.83	97.886	98.86	100.196
50.83	99.467	44.98	99.49	45.01	97.875	99.03	100.196
51	99.463	45.15	99.487	45.19	97.864	99.2	100.192
51.18	99.463	45.33	99.479	45.36	97.849	99.37	100.192
51.35	99.46	45.5	99.471	45.54	97.835	99.54	100.196
51.52	99.456	45.68	99.467	45.71	97.82	99.71	100.192
51.69	99.451	45.85	99.46	45.88	97.809	99.88	100.188
51.86	99.448	46.03	99.456	46.06	97.795	100.05	100.192
52.04	99.448	46.2	99.448	46.23	97.784	100.21	100.192
52.21	99.444	46.37	99.441	46.41	97.769	100.38	100.192
52.39	99.44	46.55	99.437	46.58	97.754	100.55	100.192
52.56	99.436	46.73	99.425	46.76	97.743	100.72	100.188
52.74	99.436	46.9	99.421	46.93	97.729	100.89	100.188
52.91	99.432	47.07	99.414	47.11	97.718	101.05	100.188
53.09	99.428	47.25	99.406	47.28	97.703	101.21	100.188
53.26	99.424	47.42	99.398	47.46	97.693	101.38	100.188
53.44	99.42	47.59	99.391	47.63	97.678	101.54	100.188
53.61	99.416	47.77	99.383	47.81	97.663	101.71	100.184
53.79	99.416	47.95	99.379	47.98	97.649	101.87	100.184
53.96	99.412	48.12	99.375	48.15	97.641	102.03	100.184
54.14	99.408	48.29	99.364	48.32	97.623	102.2	100.18
54.32	99.404	48.47	99.356	48.49	97.612	102.36	100.184
54.49	99.4	48.64	99.348	48.66	97.598	102.53	100.184
54.67	99.396	48.81	99.341	48.84	97.583	102.69	100.18
54.85	99.392	48.98	99.337	49.01	97.568	102.85	100.18
55.02	99.388	49.16	99.329	49.18	97.557	103.01	100.18
55.2	99.384	49.33	99.322	49.35	97.546	103.17	100.18
55.38	99.38	49.5	99.314	49.52	97.536	103.34	100.18
55.55	99.376	49.67	99.306	49.69	97.521	103.5	100.18
55.73	99.376	49.84	99.299	49.86	97.51	103.66	100.177
55.9	99.376	50.02	99.291	50.03	97.496	103.82	100.18
56.08	99.368	50.19	99.287	50.2	97.485	103.98	100.177
56.25	99.364	50.37	99.276	50.37	97.474	104.15	100.18
56.43	99.36	50.54	99.268	50.54	97.459	104.31	100.18
56.6	99.356	50.71	99.264	50.71	97.444	104.47	100.18
56.78	99.356	50.89	99.264	50.89	97.433	104.63	100.184
56.95	99.348	51.06	99.256	51.06	97.423	104.79	100.18
57.13	99.348	51.24	99.249	51.23	97.408	104.95	100.18
57.3	99.344	51.41	99.241	51.41	97.397	105.12	100.177
57.48	99.34	51.59	99.234	51.58	97.386	105.28	100.18
57.65	99.336	51.77	99.229	51.75	97.371	105.44	100.177
57.82	99.336	51.94	99.222	51.93	97.36	105.6	100.177
58	99.332	52.12	99.218	52.1	97.35	105.77	100.177
58.17	99.328	52.29	99.21	52.28	97.339	105.93	100.177
58.34	99.328	52.47	99.199	52.46	97.328	106.09	100.173
58.52	99.324	52.64	99.195	52.63	97.313	106.25	100.173
58.69	99.324	52.81	99.188	52.81	97.298	106.42	100.177
58.86	99.32	52.99	99.18	52.98	97.291	106.57	100.173
59.04	99.317	53.16	99.172	53.16	97.276	106.74	100.173
59.21	99.312	53.34	99.168	53.33	97.266	106.9	100.173
59.39	99.312	53.52	99.164	53.51	97.251	107.06	100.173
59.56	99.305	53.7	99.157	53.68	97.244	107.22	100.173
59.73	99.305	53.87	99.149	53.86	97.229	107.38	100.173
59.91	99.301	54.05	99.142	54.03	97.218	107.54	100.169
60.08	99.296	54.23	99.134	54.21	97.207	107.7	100.169
60.26	99.296	54.41	99.126	54.38	97.193	107.86	100.169
60.43	99.293	54.58	99.122	54.56	97.182	108.02	100.165
60.6	99.293	54.76	99.115	54.74	97.171	108.18	100.165
60.78	99.289	54.94	99.107	54.92	97.16	108.35	100.165
60.95	99.289	55.11	99.103	55.09	97.149	108.51	100.165
61.13	99.285	55.29	99.099	55.27	97.138	108.67	100.165
61.3	99.285	55.46	99.092	55.44	97.127	108.83	100.169
61.48	99.281	55.64	99.084	55.62	97.112	108.99	100.165
61.65	99.281	55.81	99.08	55.8	97.101	109.15	100.161
61.83	99.277	55.98	99.076	55.97	97.09	109.31	100.161
62	99.273	56.16	99.065	56.15	97.08	109.47	100.165
62.17	99.269	56.33	99.061	56.33	97.069	109.63	100.161
62.35	99.269	56.51	99.053	56.5	97.058	109.79	100.161
62.52	99.269	56.68	99.049	56.67	97.047	109.95	100.161
62.7	99.265	56.86	99.042	56.84	97.036	110.11	100.157
62.87	99.261	57.03	99.034	57.02	97.025	110.27	100.157
63.05	99.257	57.2	99.03	57.19	97.01	110.43	100.157
63.22	99.253	57.38	99.023	57.37	96.999	110.59	100.157
63.39	99.249	57.56	99.015	57.54	96.988	110.75	100.153
63.56	99.249	57.73	99.011	57.72	96.977	110.91	100.157
63.74	99.249	57.91	99.003	57.89	96.97	111.07	100.153
63.91	99.245	58.08	99	58.07	96.959	111.23	100.153
64.09	99.245	58.26	98.992	58.24	96.948	111.39	100.153
64.27	99.245	58.43	98.984	58.42	96.937	111.55	100.153
64.44	99.245	58.61	98.981	58.59	96.926	111.71	100.153
64.62	99.241	58.78	98.973	58.77	96.915	111.87	100.149
64.79	99.237	58.96	98.965	58.94	96.904	112.03	100.149
64.97	99.237	59.13	98.961	59.11	96.897	112.19	100.149
65.14	99.233	59.31	98.954	59.29	96.886	112.35	100.149
65.32	99.229	59.48	98.946	59.46	96.875	112.51	100.149
65.5	99.225	59.65	98.942	59.64	96.864	112.67	100.145
65.67	99.225	59.83	98.935	59.81	96.857	112.83	100.145
65.85	99.221	60	98.931	59.99	96.85	112.99	100.145
66.02	99.217	60.17	98.927	60.16	96.842	113.16	100.145
66.2	99.221	60.35	98.919	60.34	96.831	113.32	100.141
66.37	99.213	60.53	98.915	60.51	96.82	113.48	100.141
66.55	99.213	60.7	98.911	60.69	96.813	113.64	100.141
66.72	99.209	60.88	98.904	60.86	96.806	113.8	100.141
66.9	99.209	61.05	98.896	61.04	96.799	113.96	100.137
67.07	99.205	61.23	98.892	61.22	96.791	114.13	100.137
67.25	99.205	61.41	98.885	61.39	96.784	114.29	100.133
67.42	99.201	61.58	98.877	61.56	96.773	114.45	100.133
67.6	99.197	61.76	98.873	61.74	96.766	114.61	100.133
67.78	99.197	61.93	98.865	61.91	96.755	114.77	100.13
67.95	99.193	62.11	98.862	62.09	96.748	114.94	100.13
68.13	99.193	62.28	98.858	62.26	96.737	115.1	100.13
68.31	99.193	62.46	98.85	62.44	96.726	115.26	100.126
68.48	99.189	62.63	98.842	62.61	96.715	115.43	100.126
68.66	99.189	62.81	98.839	62.78	96.711	115.59	100.126
68.84	99.189	62.98	98.835	62.96	96.704	115.75	100.122
69.01	99.185	63.16	98.827	63.13	96.693	115.91	100.122
69.19	99.185	63.34	98.823	63.31	96.686	116.07	100.122
69.36	99.181	63.51	98.82	63.48	96.678	116.23	100.122
69.54	99.181	63.68	98.816	63.65	96.667	116.39	100.118
69.72	99.181	63.86	98.808	63.83	96.664	116.55	100.118
69.89	99.177	64.03	98.804	64	96.653	116.71	100.118
70.07	99.177	64.2	98.8	64.17	96.645	116.87	100.114
70.24	99.173	64.38	98.793	64.35	96.634	117.03	100.11
70.42	99.169	64.55	98.789	64.52	96.627	117.19	100.114
70.6	99.169	64.72	98.785	64.7	96.62	117.35	100.11
70.77	99.165	64.9	98.781	64.87	96.613	117.51	100.11
70.95	99.165	65.07	98.774	65.04	96.605	117.68	100.106
71.13	99.162	65.24	98.77	65.22	96.594	117.84	100.106
71.3	99.162	65.42	98.766	65.39	96.591	118.01	100.106
71.48	99.162	65.59	98.762	65.57	96.584	118.17	100.102
71.65	99.157	65.77	98.754	65.74	96.58	118.33	100.098
71.83	99.153	65.94	98.75	65.92	96.573	118.49	100.098
72	99.153	66.11	98.75	66.09	96.562	118.65	100.098
72.18	99.153	66.29	98.739	66.27	96.554	118.82	100.094
72.35	99.15	66.46	98.735	66.44	96.547	118.98	100.09
72.53	99.15	66.64	98.731	66.62	96.543	119.14	100.09
72.7	99.15	66.81	98.728	66.8	96.536	119.31	100.09
72.88	99.146	66.98	98.72	66.97	96.525	119.47	100.086
73.05	99.146	67.16	98.712	67.15	96.518	119.63	100.082
73.22	99.146	67.34	98.708	67.32	96.51	119.8	100.082
73.39	99.141	67.51	98.708	67.5	96.503	119.96	100.082
73.57	99.141	67.69	98.701	67.68	96.496	120.13	100.079
73.75	99.138	67.86	98.701	67.85	96.489	120.29	100.079
73.92	99.141	68.04	98.693	68.03	96.481	120.45	100.075
74.09	99.138	68.21	98.689	68.2	96.478	120.61	100.075
74.27	99.134	68.39	98.682	68.38	96.47	120.78	100.071
74.44	99.138	68.56	98.678	68.55	96.463	120.94	100.067
74.61	99.134	68.74	98.674	68.73	96.459	121.1	100.067
74.79	99.134	68.91	98.67	68.9	96.452	121.27	100.063
74.96	99.134	69.09	98.666	69.08	96.445	121.43	100.063
75.14	99.13	69.26	98.662	69.26	96.437	121.59	100.063
75.31	99.126	69.44	98.655	69.43	96.434	121.76	100.059
75.48	99.126	69.61	98.651	69.6	96.427	121.92	100.051
75.65	99.126	69.79	98.651	69.78	96.419	122.08	100.051
75.83	99.126	69.97	98.643	69.95	96.416	122.24	100.047
76	99.126	70.14	98.639	70.13	96.408	122.4	100.047
76.18	99.118	70.32	98.632	70.3	96.405	122.56	100.043
76.35	99.118	70.5	98.632	70.47	96.397	122.73	100.043
76.52	99.118	70.67	98.628	70.65	96.394	122.89	100.035
76.7	99.118	70.85	98.62	70.83	96.39	123.05	100.035
76.87	99.114	71.02	98.616	71	96.379	123.22	100.031
77.05	99.114	71.2	98.616	71.18	96.372	123.38	100.027
77.22	99.114	71.37	98.609	71.36	96.368	123.54	100.027
77.4	99.114	71.55	98.609	71.53	96.361	123.7	100.024
77.57	99.114	71.72	98.605	71.71	96.357	123.87	100.024
77.75	99.11	71.89	98.597	71.88	96.353	124.03	100.02
77.92	99.106	72.07	98.593	72.06	96.346	124.19	100.016
78.1	99.106	72.24	98.586	72.23	96.343	124.36	100.012
78.27	99.106	72.42	98.586	72.41	96.335	124.52	100.012
78.45	99.106	72.59	98.582	72.58	96.332	124.68	100.008
78.62	99.106	72.76	98.582	72.76	96.328	124.85	100
78.8	99.106	72.94	98.578	72.93	96.321	125.01	99.996
78.97	99.106	73.11	98.574	73.11	96.317	125.17	99.996
79.15	99.102	73.28	98.57	73.28	96.31	125.33	99.992
79.32	99.102	73.45	98.567	73.46	96.306	125.49	99.992
79.5	99.098	73.63	98.563	73.63	96.299	125.65	99.988
79.67	99.098	73.8	98.559	73.81	96.295	125.82	99.984
79.84	99.098	73.98	98.555	73.98	96.288	125.98	99.984
80.01	99.094	74.15	98.551	74.16	96.284	126.14	99.98
80.19	99.094	74.33	98.551	74.33	96.281	126.3	99.977
80.36	99.094	74.5	98.547	74.51	96.273	126.46	99.973
80.54	99.094	74.67	98.54	74.69	96.27	126.62	99.969
80.71	99.094	74.85	98.536	74.86	96.262	126.78	99.965
80.89	99.09	75.02	98.536	75.04	96.259	126.95	99.965
81.06	99.09	75.2	98.532	75.21	96.255	127.11	99.961
81.23	99.09	75.37	98.532	75.39	96.251	127.27	99.957
81.41	99.09	75.54	98.528	75.56	96.248	127.43	99.953
81.59	99.086	75.72	98.524	75.73	96.244	127.59	99.945
81.76	99.086	75.89	98.521	75.91	96.237	127.76	99.941
81.94	99.086	76.07	98.517	76.08	96.233	127.92	99.937
82.11	99.082	76.24	98.513	76.25	96.23	128.08	99.933
82.29	99.082	76.42	98.509	76.43	96.226	128.24	99.926
82.46	99.082	76.59	98.505	76.6	96.222	128.4	99.922
82.64	99.078	76.76	98.505	76.78	96.219	128.56	99.922
82.81	99.078	76.94	98.505	76.95	96.215	128.72	99.918
82.98	99.074	77.11	98.501	77.13	96.208	128.88	99.914
83.16	99.074	77.29	98.497	77.3	96.208	129.05	99.906
83.33	99.074	77.46	98.494	77.47	96.208	129.2	99.906
83.51	99.07	77.63	98.49	77.64	96.197	129.37	99.898
83.68	99.07	77.81	98.486	77.82	96.193	129.53	99.898
83.86	99.074	77.98	98.482	77.99	96.186	129.68	99.89
84.03	99.07	78.15	98.482	78.16	96.182	129.84	99.89
84.2	99.07	78.33	98.478	78.33	96.182	130	99.883
84.38	99.07	78.5	98.478	78.51	96.178	130.16	99.878
84.55	99.07	78.68	98.475	78.68	96.175	130.31	99.875
84.73	99.07	78.85	98.471	78.86	96.171	130.47	99.871
84.91	99.07	79.03	98.471	79.03	96.164	130.62	99.863
85.08	99.066	79.2	98.471	79.21	96.164	130.78	99.859
85.26	99.066	79.37	98.463	79.38	96.16	130.93	99.851
85.44	99.066	79.54	98.467	79.56	96.153	131.08	99.847
85.61	99.062	79.71	98.463	79.73	96.153	131.23	99.843
85.79	99.062	79.89	98.455	79.9	96.149	131.38	99.839
85.96	99.062	80.07	98.455	80.08	96.142	131.53	99.836
86.14	99.058	80.24	98.455	80.25	96.142	131.68	99.831
86.31	99.058	80.42	98.451	80.42	96.138	131.83	99.824
86.49	99.058	80.59	98.448	80.59	96.131	131.97	99.816
86.66	99.062	80.77	98.444	80.76	96.127	132.12	99.812
86.84	99.062	80.94	98.444	80.93	96.124	132.26	99.808
87.02	99.058	81.11	98.44	81.1	96.124	132.41	99.8
87.19	99.058	81.29	98.436	81.28	96.117	132.56	99.796
87.37	99.054	81.47	98.436	81.45	96.117	132.7	99.789
87.54	99.054	81.64	98.436	81.62	96.113	132.85	99.781
87.72	99.05	81.81	98.429	81.79	96.109	132.99	99.777
87.89	99.05	81.99	98.429	81.96	96.106	133.13	99.773
88.07	99.05	82.16	98.429	82.13	96.098	133.27	99.765
88.25	99.05	82.34	98.429	82.31	96.098	133.41	99.761
88.42	99.046	82.51	98.425	82.48	96.091	133.55	99.753
88.6	99.046	82.69	98.425	82.66	96.091	133.7	99.749
88.77	99.042	82.86	98.421	82.84	96.084	133.84	99.741
88.95	99.038	83.04	98.421	83.01	96.084	133.98	99.734
89.12	99.038	83.22	98.417	83.19	96.08	134.12	99.726
89.3	99.038	83.39	98.413	83.36	96.076	134.26	99.718
89.48	99.038	83.57	98.409	83.54	96.076	134.4	99.71
89.65	99.034	83.75	98.413	83.71	96.073	134.54	99.702
89.83	99.034	83.92	98.409	83.88	96.069	134.69	99.694
90	99.034	84.1	98.405	84.06	96.065	134.83	99.69
90.18	99.03	84.28	98.405	84.24	96.062	134.97	99.679
90.36	99.026	84.45	98.402	84.41	96.062	135.12	99.675
90.53	99.034	84.63	98.402	84.59	96.058	135.27	99.667
90.71	99.03	84.81	98.398	84.77	96.058	135.41	99.655
90.89	99.026	84.98	98.398	84.94	96.054	135.56	99.651
91.06	99.026	85.16	98.394	85.12	96.051	135.71	99.64
91.24	99.022	85.33	98.39	85.29	96.047	135.87	99.632
91.41	99.022	85.51	98.39	85.47	96.047	136.03	99.62
91.59	99.022	85.68	98.386	85.64	96.044	136.19	99.608
91.76	99.022	85.86	98.39	85.82	96.044	136.36	99.596
91.94	99.026	86.03	98.386	86	96.04	136.54	99.585
92.11	99.022	86.2	98.383	86.17	96.036	136.71	99.573
92.29	99.022	86.38	98.383	86.35	96.036	136.89	99.561
92.47	99.018	86.55	98.383	86.53	96.033	137.07	99.545
92.64	99.018	86.73	98.383	86.71	96.029	137.25	99.534
92.81	99.018	86.9	98.375	86.88	96.025	137.43	99.518
92.99	99.018	87.08	98.379	87.06	96.025	137.61	99.502
93.17	99.014	87.25	98.371	87.24	96.022	137.79	99.49
93.34	99.014	87.43	98.371	87.42	96.022	137.97	99.475
93.51	99.014	87.6	98.371	87.59	96.018	138.15	99.455
93.68	99.01	87.78	98.367	87.77	96.018	138.33	99.44
93.86	99.01	87.95	98.367	87.95	96.011	138.51	99.42
94.03	99.007	88.13	98.363	88.12	96.011	138.69	99.4
94.2	99.007	88.31	98.363	88.3	96.007	138.86	99.385
94.38	99.007	88.48	98.363	88.48	96.003	139.04	99.365
94.55	99.007	88.66	98.363	88.66	96.003	139.22	99.345
94.73	99.002	88.84	98.363	88.83	96	139.39	99.326
94.9	99.002	89.01	98.36	89.01	95.996	139.57	99.306
95.07	99.002	89.19	98.36	89.19	95.992	139.74	99.283
95.24	98.999	89.36	98.356	89.36	95.989	139.91	99.259
95.41	98.999	89.54	98.356	89.54	95.989	140.09	99.236
95.58	98.995	89.71	98.356	89.72	95.985	140.26	99.216
95.75	98.995	89.89	98.356	89.89	95.981	140.43	99.192
95.92	98.99	90.07	98.356	90.07	95.978	140.6	99.169
96.09	98.995	90.24	98.352	90.25	95.978	140.78	99.145
96.26	98.99	90.42	98.352	90.42	95.974	140.94	99.122
96.43	98.99	90.6	98.348	90.6	95.974	141.12	99.098
96.6	98.987	90.77	98.348	90.78	95.97	141.29	99.075
96.77	98.987	90.95	98.344	90.95	95.967	141.46	99.047
96.94	98.987	91.13	98.344	91.13	95.967	141.63	99.024
97.11	98.983	91.3	98.344	91.31	95.963	141.8	98.997
97.28	98.983	91.48	98.34	91.48	95.963	141.97	98.973
97.45	98.983	91.65	98.34	91.66	95.96	142.14	98.95
97.62	98.983	91.83	98.34	91.83	95.96	142.31	98.922
97.78	98.983	92	98.337	92.01	95.96	142.48	98.895
97.95	98.983	92.18	98.337	92.19	95.96	142.65	98.867
98.12	98.979	92.35	98.337	92.36	95.956	142.81	98.84
98.29	98.975	92.53	98.337	92.54	95.956	142.98	98.812
98.46	98.975	92.71	98.333	92.72	95.949	143.15	98.785
98.63	98.975	92.88	98.333	92.9	95.952	143.31	98.757
98.8	98.971	93.06	98.333	93.08	95.945	143.48	98.726
98.97	98.971	93.23	98.333	93.25	95.945	143.64	98.699
99.14	98.971	93.41	98.333	93.43	95.941	143.81	98.671
99.3	98.967	93.58	98.333	93.6	95.941	143.97	98.64
99.47	98.967	93.75	98.329	93.78	95.938	144.14	98.608
99.64	98.967	93.92	98.329	93.95	95.938	144.3	98.577
99.81	98.963	94.1	98.329	94.13	95.934	144.47	98.546
99.98	98.963	94.27	98.325	94.3	95.934	144.63	98.514
100.15	98.963	94.44	98.321	94.47	95.931	144.8	98.483
100.32	98.959	94.61	98.325	94.64	95.927	144.96	98.452
100.48	98.959	94.78	98.325	94.81	95.923	145.13	98.42
100.65	98.959	94.95	98.321	94.99	95.923	145.29	98.385
100.82	98.955	95.12	98.321	95.16	95.919	145.46	98.35
100.98	98.955	95.29	98.321	95.33	95.916	145.62	98.318
101.15	98.951	95.46	98.317	95.5	95.916	145.78	98.287
101.32	98.951	95.63	98.317	95.67	95.916	145.95	98.248
101.48	98.947	95.8	98.317	95.84	95.912	146.11	98.216
101.65	98.947	95.96	98.317	96.01	95.908	146.28	98.181
101.81	98.943	96.13	98.314	96.18	95.908	146.44	98.142
101.98	98.943	96.3	98.317	96.35	95.905	146.61	98.107
102.14	98.939	96.47	98.314	96.52	95.905	146.77	98.075
102.31	98.943	96.64	98.317	96.69	95.905	146.93	98.04
102.47	98.943	96.8	98.314	96.85	95.905	147.09	98.001
102.64	98.935	96.97	98.314	97.02	95.901	147.26	97.962
102.8	98.939	97.14	98.31	97.19	95.901	147.42	97.926
102.97	98.935	97.31	98.31	97.36	95.897	147.58	97.891
103.14	98.935	97.48	98.31	97.53	95.897	147.74	97.848
103.3	98.931	97.64	98.314	97.7	95.897	147.91	97.809
103.47	98.931	97.81	98.31	97.87	95.894	148.07	97.769
103.64	98.927	97.97	98.31	98.03	95.89	148.23	97.734
103.8	98.927	98.14	98.306	98.2	95.89	148.4	97.699
103.98	98.927	98.31	98.31	98.37	95.89	148.56	97.656
104.14	98.923	98.47	98.306	98.54	95.886	148.72	97.617
104.31	98.919	98.64	98.306	98.7	95.883	148.88	97.573
104.48	98.919	98.81	98.306	98.87	95.883	149.04	97.534
104.65	98.919	98.98	98.306	99.04	95.883	149.21	97.495
104.82	98.919	99.14	98.306	99.21	95.879	149.36	97.452
104.98	98.911	99.31	98.306	99.38	95.879	149.52	97.409
105.15	98.911	99.48	98.306	99.55	95.876	149.69	97.366
105.32	98.907	99.65	98.306	99.72	95.876	149.85	97.323
105.49	98.907	99.82	98.306	99.88	95.872	150.01	97.279
105.65	98.907	99.98	98.302	100.05	95.872	150.17	97.236
105.82	98.903	100.15	98.302	100.22	95.868	150.33	97.193
105.98	98.899	100.32	98.306	100.39	95.868	150.49	97.146
106.15	98.895	100.49	98.302	100.55	95.868	150.65	97.103
106.31	98.895	100.66	98.302	100.72	95.865	150.81	97.06
106.47	98.895	100.83	98.302	100.89	95.865	150.97	97.013
106.63	98.891	100.99	98.298	101.05	95.861	151.13	96.97
106.79	98.887	101.16	98.298	101.22	95.857	151.3	96.919
106.96	98.883	101.33	98.298	101.39	95.861	151.46	96.872
107.12	98.879	101.49	98.294	101.55	95.861	151.61	96.828
107.29	98.875	101.66	98.298	101.72	95.857	151.77	96.781
107.46	98.875	101.83	98.294	101.89	95.854	151.93	96.734
107.62	98.875	101.99	98.294	102.05	95.85	152.09	96.684
107.79	98.867	102.16	98.294	102.22	95.847	152.25	96.636
107.95	98.867	102.33	98.294	102.39	95.847	152.41	96.586
108.12	98.867	102.49	98.294	102.55	95.843	152.56	96.534
108.28	98.863	102.66	98.294	102.72	95.847	152.72	96.487
108.44	98.863	102.83	98.294	102.89	95.847	152.88	96.437
108.61	98.859	102.99	98.294	103.05	95.839	153.04	96.382
108.77	98.859	103.16	98.29	103.22	95.839	153.2	96.335
108.93	98.859	103.33	98.29	103.38	95.836	153.36	96.28
109.1	98.856	103.49	98.287	103.55	95.836	153.52	96.229
109.26	98.856	103.66	98.287	103.71	95.832	153.68	96.178
109.43	98.847	103.82	98.287	103.88	95.832	153.84	96.123
109.6	98.847	103.99	98.29	104.04	95.828	154	96.068
109.76	98.844	104.16	98.287	104.21	95.828	154.16	96.017
109.93	98.844	104.32	98.287	104.37	95.828	154.32	95.962
110.1	98.84	104.49	98.287	104.54	95.825	154.48	95.907
110.26	98.84	104.66	98.287	104.7	95.825	154.64	95.852
110.43	98.835	104.83	98.287	104.87	95.821	154.8	95.798
110.6	98.832	104.99	98.283	105.03	95.821	154.96	95.739
110.77	98.832	105.16	98.287	105.2	95.817	155.13	95.684
110.93	98.824	105.33	98.287	105.36	95.817	155.29	95.625
111.1	98.824	105.49	98.287	105.53	95.814	155.45	95.57
111.27	98.82	105.66	98.287	105.69	95.81	155.61	95.511
111.43	98.816	105.82	98.283	105.86	95.81	155.77	95.452
111.6	98.812	105.99	98.283	106.02	95.806	155.93	95.39
111.76	98.812	106.16	98.283	106.19	95.806	156.09	95.331
111.93	98.808	106.32	98.283	106.35	95.806	156.25	95.272
112.1	98.804	106.49	98.279	106.52	95.806	156.42	95.209
112.26	98.8	106.65	98.279	106.68	95.803	156.58	95.147
112.43	98.796	106.82	98.279	106.85	95.795	156.75	95.092
112.59	98.792	106.98	98.283	107.01	95.799	156.91	95.029
112.76	98.792	107.15	98.279	107.17	95.799	157.07	94.966
112.92	98.788	107.32	98.279	107.34	95.795	157.24	94.904
113.09	98.784	107.48	98.283	107.5	95.795	157.4	94.841
113.26	98.78	107.64	98.279	107.67	95.795	157.56	94.778
113.42	98.78	107.81	98.279	107.83	95.792	157.72	94.712
113.59	98.776	107.97	98.279	108	95.788	157.88	94.649
113.76	98.772	108.13	98.275	108.16	95.788	158.05	94.582
113.92	98.764	108.29	98.275	108.33	95.788	158.21	94.516
114.09	98.764	108.46	98.275	108.49	95.788	158.37	94.449
114.26	98.76	108.62	98.275	108.66	95.784	158.53	94.382
114.43	98.756	108.78	98.275	108.82	95.784	158.69	94.316
114.59	98.752	108.94	98.275	108.99	95.781	158.85	94.249
114.76	98.748	109.11	98.275	109.15	95.777	159.02	94.178
114.92	98.744	109.27	98.275	109.31	95.777	159.18	94.112
115.09	98.74	109.44	98.275	109.48	95.777	159.35	94.045
115.26	98.736	109.6	98.275	109.65	95.774	159.51	93.974
115.42	98.732	109.76	98.271	109.81	95.774	159.67	93.904
115.59	98.728	109.93	98.275	109.98	95.774	159.83	93.837
115.76	98.724	110.09	98.275	110.14	95.766	160	93.767
115.93	98.72	110.26	98.275	110.31	95.77	160.16	93.692
116.09	98.712	110.43	98.275	110.47	95.77	160.32	93.622
116.26	98.708	110.59	98.275	110.63	95.766	160.48	93.547
116.43	98.704	110.76	98.275	110.8	95.763	160.65	93.473
116.59	98.696	110.93	98.275	110.96	95.763	160.81	93.398
116.76	98.701	111.09	98.271	111.13	95.759	160.97	93.328
116.93	98.692	111.26	98.271	111.29	95.759	161.13	93.249
117.1	98.689	111.43	98.271	111.46	95.759	161.29	93.175
117.27	98.689	111.59	98.268	111.62	95.755	161.46	93.1
117.44	98.685	111.76	98.271	111.78	95.755	161.62	93.022
117.61	98.677	111.93	98.271	111.95	95.752	161.78	92.944
117.77	98.669	112.09	98.271	112.11	95.748	161.94	92.865
117.94	98.665	112.26	98.268	112.27	95.752	162.1	92.791
118.11	98.665	112.42	98.268	112.44	95.748	162.27	92.708
118.28	98.657	112.59	98.271	112.6	95.748	162.43	92.63
118.45	98.653	112.76	98.271	112.77	95.748	162.59	92.551
118.62	98.645	112.92	98.268	112.93	95.744	162.76	92.469
118.78	98.641	113.09	98.268	113.09	95.741	162.92	92.391
118.95	98.637	113.26	98.268	113.26	95.741	163.08	92.308
119.12	98.633	113.42	98.271	113.42	95.741	163.25	92.23
119.29	98.625	113.59	98.268	113.59	95.737	163.41	92.144
119.46	98.621	113.76	98.268	113.75	95.737	163.57	92.065
119.62	98.617	113.92	98.268	113.92	95.733	163.73	91.979
119.79	98.613	114.09	98.268	114.08	95.733	163.89	91.897
119.95	98.605	114.25	98.264	114.25	95.73	164.06	91.807
120.12	98.601	114.42	98.264	114.41	95.73	164.22	91.724
120.29	98.597	114.59	98.268	114.57	95.726	164.38	91.634
120.46	98.589	114.75	98.264	114.74	95.726	164.54	91.552
120.63	98.581	114.92	98.264	114.9	95.726	164.7	91.462
120.79	98.577	115.08	98.264	115.07	95.722	164.87	91.375
120.96	98.573	115.25	98.264	115.24	95.722	165.03	91.285
121.13	98.565	115.42	98.264	115.4	95.719	165.19	91.195
121.3	98.561	115.59	98.26	115.57	95.719	165.35	91.105
121.47	98.557	115.75	98.26	115.74	95.715	165.51	91.015
121.63	98.549	115.92	98.264	115.91	95.711	165.67	90.921
121.8	98.546	116.09	98.264	116.08	95.708	165.83	90.83
121.97	98.537	116.26	98.264	116.25	95.708	166	90.736
122.14	98.534	116.43	98.26	116.42	95.711	166.16	90.646
122.31	98.522	116.6	98.26	116.59	95.708	166.32	90.552
122.48	98.522	116.76	98.26	116.75	95.704	166.48	90.454
122.65	98.514	116.93	98.26	116.92	95.704	166.64	90.356
122.82	98.506	117.1	98.26	117.09	95.704	166.8	90.262
122.99	98.502	117.27	98.264	117.25	95.7	166.96	90.168
123.15	98.49	117.43	98.264	117.42	95.697	167.12	90.07
123.32	98.482	117.61	98.264	117.59	95.7	167.28	89.968
123.49	98.482	117.77	98.264	117.76	95.697	167.44	89.866
123.66	98.474	117.94	98.264	117.92	95.7	167.6	89.772
123.83	98.47	118.11	98.26	118.09	95.7	167.77	89.67
123.99	98.466	118.28	98.256	118.26	95.697	167.93	89.572
124.16	98.454	118.45	98.256	118.43	95.69	168.09	89.47
124.33	98.446	118.62	98.256	118.6	95.69	168.25	89.368
124.5	98.438	118.79	98.256	118.77	95.69	168.41	89.262
124.67	98.43	118.96	98.256	118.94	95.686	168.57	89.16
124.83	98.422	119.13	98.26	119.11	95.686	168.73	89.058
125	98.414	119.3	98.256	119.28	95.686	168.89	88.953
125.17	98.41	119.47	98.256	119.44	95.686	169.05	88.847
125.34	98.402	119.63	98.26	119.61	95.682	169.21	88.741
125.5	98.394	119.81	98.256	119.78	95.679	169.37	88.635
125.67	98.386	119.97	98.256	119.95	95.675	169.53	88.525
125.83	98.379	120.14	98.26	120.12	95.675	169.7	88.419
126	98.371	120.31	98.256	120.28	95.675	169.86	88.31
126.17	98.359	120.48	98.256	120.45	95.675	170.02	88.2
126.33	98.351	120.65	98.256	120.62	95.675	170.18	88.09
126.5	98.343	120.82	98.256	120.79	95.671	170.34	87.976
126.67	98.335	120.99	98.26	120.96	95.671	170.5	87.867
126.83	98.327	121.16	98.26	121.13	95.668	170.66	87.753
127	98.319	121.33	98.26	121.3	95.668	170.83	87.643
127.16	98.311	121.49	98.256	121.47	95.664	170.99	87.526
127.33	98.303	121.66	98.256	121.64	95.664	171.15	87.412
127.49	98.291	121.83	98.252	121.82	95.664	171.32	87.298
127.66	98.283	122	98.252	121.99	95.661	171.48	87.181
127.83	98.279	122.17	98.252	122.16	95.657	171.64	87.067
127.99	98.267	122.34	98.252	122.32	95.657	171.81	86.949
128.16	98.259	122.51	98.252	122.5	95.653	171.97	86.824
128.32	98.251	122.68	98.252	122.67	95.653	172.13	86.706
128.49	98.24	122.85	98.252	122.84	95.653	172.29	86.589
128.66	98.231	123.01	98.252	123.01	95.65	172.46	86.471
128.82	98.224	123.18	98.252	123.18	95.65	172.62	86.35
128.98	98.208	123.35	98.248	123.35	95.653	172.78	86.228
129.15	98.204	123.52	98.248	123.52	95.65	172.95	86.107
129.31	98.192	123.68	98.248	123.69	95.65	173.11	85.985
129.48	98.18	123.85	98.252	123.85	95.646	173.28	85.863
129.64	98.176	124.02	98.248	124.02	95.646	173.44	85.738
129.81	98.164	124.18	98.252	124.19	95.642	173.6	85.612
129.98	98.152	124.35	98.252	124.36	95.642	173.76	85.487
130.15	98.14	124.52	98.248	124.53	95.639	173.93	85.362
130.31	98.128	124.69	98.248	124.7	95.635	174.09	85.236
130.48	98.12	124.86	98.252	124.86	95.639	174.26	85.111
130.65	98.108	125.03	98.248	125.03	95.635	174.42	84.981
130.81	98.1	125.19	98.248	125.2	95.635	174.58	84.852
130.98	98.088	125.36	98.252	125.37	95.635	174.75	84.719
131.15	98.076	125.53	98.252	125.53	95.631	174.91	84.585
131.32	98.065	125.7	98.252	125.7	95.628	175.08	84.46
131.49	98.053	125.87	98.248	125.87	95.624	175.24	84.327
131.66	98.041	126.03	98.248	126.04	95.624	175.41	84.197
131.83	98.029	126.21	98.248	126.21	95.624	175.57	84.064
132	98.013	126.37	98.248	126.38	95.62	175.73	83.931
132.16	98.001	126.54	98.248	126.55	95.62	175.9	83.797
132.34	97.989	126.71	98.248	126.72	95.617	176.06	83.66
132.5	97.973	126.88	98.248	126.89	95.617	176.22	83.523
132.67	97.957	127.05	98.248	127.06	95.617	176.38	83.389
132.84	97.945	127.22	98.252	127.23	95.617	176.55	83.252
133	97.933	127.39	98.248	127.4	95.613	176.71	83.115
133.17	97.918	127.56	98.248	127.57	95.609	176.87	82.978
133.34	97.91	127.72	98.248	127.74	95.609	177.04	82.841
133.5	97.894	127.89	98.248	127.9	95.609	177.2	82.704
133.67	97.878	128.06	98.248	128.07	95.609	177.36	82.566
133.83	97.866	128.23	98.248	128.24	95.609	177.53	82.425
134	97.854	128.4	98.248	128.41	95.606	177.69	82.284
134.16	97.838	128.57	98.248	128.57	95.602	177.85	82.147
134.33	97.826	128.74	98.248	128.75	95.602	178.02	82.006
134.5	97.81	128.91	98.248	128.91	95.602	178.18	81.869
134.67	97.794	129.08	98.244	129.08	95.598	178.35	81.728
134.84	97.775	129.25	98.244	129.25	95.598	178.52	81.586
135	97.759	129.41	98.244	129.41	95.595	178.68	81.445
135.17	97.747	129.58	98.244	129.58	95.595	178.85	81.304
135.34	97.727	129.75	98.248	129.75	95.591	179.02	81.163
135.51	97.711	129.92	98.248	129.92	95.591	179.18	81.018
135.67	97.695	130.09	98.248	130.09	95.591	179.35	80.873
135.84	97.675	130.25	98.248	130.26	95.587	179.52	80.728
136.01	97.663	130.42	98.244	130.43	95.584	179.68	80.587
136.18	97.647	130.59	98.244	130.6	95.584	179.85	80.441
136.35	97.627	130.76	98.244	130.77	95.584	180.01	80.292
136.52	97.612	130.93	98.244	130.94	95.58	180.17	80.144
136.69	97.592	131.1	98.241	131.1	95.577	180.34	79.995
136.85	97.576	131.27	98.244	131.27	95.577	180.5	79.846
137.02	97.556	131.44	98.244	131.44	95.577	180.67	79.697
137.19	97.544	131.61	98.241	131.61	95.569	180.83	79.552
137.35	97.524	131.78	98.241	131.78	95.569	180.99	79.399
137.52	97.504	131.94	98.237	131.95	95.569	181.16	79.25
137.69	97.484	132.11	98.241	132.12	95.566	181.32	79.097
137.86	97.469	132.28	98.237	132.28	95.566	181.49	78.944
138.03	97.449	132.45	98.237	132.45	95.569	181.65	78.791
138.2	97.429	132.61	98.237	132.62	95.562	181.81	78.638
138.36	97.409	132.78	98.237	132.79	95.562	181.98	78.485
138.53	97.389	132.94	98.237	132.96	95.562	182.14	78.332
138.69	97.373	133.11	98.237	133.13	95.558	182.3	78.176
138.86	97.353	133.28	98.237	133.29	95.555	182.47	78.019
139.03	97.333	133.44	98.237	133.46	95.555	182.63	77.866
139.19	97.314	133.61	98.237	133.63	95.551	182.8	77.709
139.35	97.29	133.78	98.237	133.8	95.551	182.96	77.552
139.52	97.27	133.94	98.233	133.97	95.551	183.12	77.396
139.68	97.25	134.11	98.233	134.13	95.547	183.29	77.243
139.85	97.23	134.28	98.237	134.3	95.544	183.45	77.086
140.01	97.21	134.44	98.233	134.47	95.547	183.61	76.925
140.18	97.19	134.61	98.233	134.63	95.544	183.78	76.764
140.34	97.171	134.78	98.229	134.8	95.544	183.94	76.607
140.51	97.15	134.94	98.229	134.97	95.544	184.11	76.451
140.68	97.127	135.11	98.229	135.13	95.54	184.27	76.29
140.84	97.103	135.28	98.229	135.3	95.54	184.44	76.129
141.01	97.083	135.45	98.229	135.47	95.536	184.6	75.968
141.18	97.059	135.62	98.225	135.63	95.536	184.77	75.808
141.35	97.039	135.79	98.225	135.8	95.533	184.93	75.647
141.51	97.019	135.95	98.225	135.97	95.533	185.09	75.486
141.68	96.996	136.12	98.225	136.14	95.533	185.26	75.322
141.85	96.976	136.29	98.225	136.31	95.529	185.42	75.161
142.01	96.956	136.46	98.225	136.47	95.529	185.59	74.996
142.18	96.932	136.62	98.225	136.64	95.529	185.75	74.831
142.35	96.904	136.79	98.222	136.81	95.525	185.91	74.671
142.51	96.884	136.95	98.222	136.97	95.525	186.08	74.502
142.68	96.865	137.12	98.222	137.14	95.525	186.24	74.341
142.85	96.841	137.29	98.222	137.31	95.525	186.4	74.173
143.01	96.817	137.46	98.218	137.48	95.522	186.57	74.004
143.18	96.797	137.62	98.218	137.65	95.518	186.73	73.84
143.35	96.773	137.79	98.218	137.81	95.518	186.9	73.671
143.52	96.745	137.96	98.214	137.98	95.514	187.06	73.507
143.68	96.725	138.12	98.218	138.15	95.507	187.22	73.342
143.85	96.701	138.29	98.214	138.31	95.507	187.39	73.173
144.02	96.678	138.45	98.214	138.48	95.507	187.55	73.009
144.18	96.654	138.62	98.214	138.64	95.507	187.72	72.836
144.35	96.634	138.79	98.214	138.81	95.504	187.88	72.668
144.52	96.606	138.96	98.214	138.98	95.504	188.04	72.499
144.68	96.586	139.12	98.21	139.15	95.5	188.2	72.33
144.85	96.562	139.29	98.214	139.31	95.504	188.37	72.158
145.02	96.535	139.46	98.214	139.48	95.504	188.53	71.993
145.19	96.511	139.62	98.214	139.65	95.5	188.69	71.821
145.35	96.487	139.8	98.214	139.81	95.496	188.86	71.648
145.52	96.459	139.96	98.214	139.98	95.496	189.02	71.476
145.69	96.431	140.13	98.206	140.15	95.496	189.19	71.303
145.85	96.412	140.3	98.21	140.32	95.496	189.35	71.135
146.02	96.38	140.46	98.206	140.48	95.493	189.52	70.962
146.19	96.356	140.63	98.206	140.65	95.489	189.68	70.789
146.35	96.328	140.8	98.203	140.82	95.489	189.85	70.617
146.52	96.304	140.96	98.203	140.98	95.489	190.02	70.445
146.69	96.28	141.13	98.203	141.15	95.485	190.18	70.268
146.85	96.252	141.3	98.203	141.31	95.489	190.35	70.096
147.02	96.225	141.47	98.203	141.48	95.485	190.51	69.919
147.19	96.197	141.63	98.198	141.65	95.482	190.68	69.747
147.35	96.173	141.8	98.198	141.81	95.482	190.84	69.571
147.52	96.145	141.97	98.198	141.98	95.478	191.01	69.39
147.68	96.117	142.13	98.198	142.15	95.474	191.17	69.217
147.85	96.086	142.3	98.198	142.31	95.474	191.34	69.045
148.02	96.058	142.46	98.198	142.48	95.474	191.5	68.869
148.18	96.03	142.63	98.198	142.65	95.474	191.66	68.688
148.35	96.002	142.8	98.198	142.82	95.471	191.83	68.512
148.52	95.97	142.96	98.198	142.98	95.471	191.99	68.336
148.68	95.942	143.13	98.195	143.15	95.467	192.16	68.159
148.85	95.911	143.29	98.198	143.31	95.464	192.32	67.979
149.02	95.883	143.46	98.198	143.48	95.464	192.49	67.798
149.19	95.855	143.63	98.195	143.65	95.467	192.65	67.618
149.35	95.827	143.79	98.191	143.81	95.464	192.81	67.438
149.52	95.796	143.96	98.191	143.98	95.46	192.98	67.257
149.69	95.764	144.12	98.191	144.14	95.46	193.14	67.081
149.85	95.732	144.29	98.187	144.3	95.456	193.31	66.897
150.02	95.7	144.46	98.187	144.47	95.456	193.47	66.716
150.19	95.668	144.62	98.187	144.63	95.452	193.64	66.536
150.35	95.637	144.79	98.187	144.8	95.449	193.81	66.352
150.52	95.609	144.96	98.187	144.96	95.449	193.97	66.167
150.68	95.573	145.12	98.187	145.13	95.452	194.14	65.987
150.85	95.545	145.29	98.187	145.3	95.449	194.31	65.803
151.01	95.513	145.45	98.187	145.47	95.449	194.48	65.623
151.17	95.478	145.62	98.183	145.63	95.445	194.64	65.434
151.34	95.442	145.78	98.183	145.8	95.445	194.81	65.246
151.5	95.41	145.95	98.179	145.97	95.441	194.98	65.066
151.66	95.378	146.12	98.179	146.13	95.441	195.15	64.882
151.83	95.343	146.29	98.176	146.3	95.441	195.31	64.694
151.99	95.311	146.46	98.179	146.46	95.438	195.48	64.505
152.16	95.275	146.62	98.176	146.63	95.438	195.65	64.321
152.32	95.239	146.79	98.176	146.8	95.434	195.82	64.125
152.49	95.207	146.95	98.172	146.97	95.434	195.98	63.945
152.66	95.172	147.12	98.172	147.13	95.434	196.15	63.756
152.82	95.136	147.29	98.164	147.3	95.43	196.32	63.568
152.99	95.1	147.46	98.172	147.47	95.43	196.48	63.376
153.15	95.06	147.62	98.168	147.64	95.427	196.65	63.192
153.32	95.028	147.79	98.168	147.81	95.427	196.82	63.004
153.48	94.997	147.96	98.164	147.98	95.427	196.98	62.816
153.64	94.961	148.13	98.164	148.15	95.42	197.15	62.627
153.81	94.921	148.3	98.16	148.32	95.42	197.31	62.435
153.98	94.885	148.46	98.16	148.48	95.416	197.48	62.243
154.14	94.846	148.63	98.16	148.65	95.416	197.64	62.055
154.3	94.81	148.8	98.16	148.82	95.412	197.81	61.863
154.47	94.77	148.97	98.156	148.98	95.412	197.97	61.671
154.63	94.731	149.13	98.156	149.15	95.412	198.14	61.483
154.8	94.695	149.3	98.156	149.32	95.412	198.3	61.291
154.96	94.655	149.46	98.156	149.49	95.412	198.47	61.098
155.13	94.615	149.63	98.153	149.65	95.409	198.63	60.907
155.29	94.579	149.79	98.153	149.82	95.409	198.8	60.71
155.46	94.544	149.96	98.149	149.99	95.405	198.96	60.514
155.62	94.5	150.12	98.149	150.15	95.405	199.13	60.322
155.79	94.46	150.29	98.153	150.32	95.405	199.3	60.126
155.96	94.421	150.46	98.149	150.49	95.405	199.46	59.93
156.12	94.381	150.62	98.149	150.66	95.398	199.63	59.734
156.29	94.337	150.79	98.149	150.82	95.401	199.8	59.538
156.45	94.297	150.96	98.145	150.99	95.398	199.97	59.342
156.62	94.257	151.13	98.141	151.16	95.398	200.13	59.146
156.78	94.218	151.29	98.141	151.32	95.394	200.3	58.95
156.95	94.17	151.46	98.141	151.49	95.394	200.47	58.754
157.12	94.13	151.63	98.141	151.65	95.394	200.63	58.554
157.29	94.087	151.79	98.137	151.82	95.391	200.8	58.358
157.46	94.043	151.96	98.137	151.98	95.391	200.97	58.158
157.62	94.003	152.13	98.137	152.15	95.387	201.13	57.962
157.79	93.956	152.3	98.137	152.31	95.387	201.3	57.766
157.96	93.912	152.46	98.133	152.48	95.387	201.47	57.562
158.12	93.868	152.63	98.13	152.64	95.383	201.63	57.366
158.29	93.824	152.8	98.13	152.81	95.38	201.8	57.17
158.45	93.777	152.97	98.126	152.97	95.38	201.97	56.971
158.62	93.729	153.13	98.126	153.14	95.38	202.13	56.77
158.78	93.685	153.3	98.126	153.31	95.38	202.3	56.57
158.95	93.638	153.46	98.13	153.48	95.376	202.47	56.371
159.11	93.594	153.63	98.126	153.64	95.376	202.64	56.174
159.28	93.546	153.8	98.126	153.81	95.372	202.8	55.975
159.44	93.498	153.96	98.126	153.98	95.372	202.97	55.775
159.61	93.455	154.13	98.126	154.14	95.369	203.14	55.575
159.77	93.403	154.29	98.122	154.31	95.369	203.31	55.375
159.94	93.352	154.46	98.118	154.47	95.369	203.47	55.175
160.1	93.304	154.63	98.118	154.64	95.365	203.64	54.975
160.27	93.256	154.79	98.114	154.81	95.361	203.81	54.771
160.43	93.213	154.96	98.114	154.97	95.361	203.97	54.571
160.6	93.161	155.12	98.114	155.13	95.361	204.14	54.367
160.76	93.109	155.29	98.11	155.3	95.358	204.31	54.167
160.93	93.061	155.45	98.107	155.47	95.358	204.48	53.968
161.09	93.014	155.61	98.11	155.63	95.358	204.65	53.763
161.26	92.962	155.78	98.11	155.8	95.354	204.82	53.56
161.43	92.906	155.94	98.107	155.97	95.354	204.98	53.352
161.59	92.859	156.11	98.107	156.13	95.354	205.15	53.152
161.76	92.803	156.27	98.103	156.3	95.35	205.32	52.948
161.92	92.755	156.44	98.103	156.47	95.354	205.49	52.744
162.09	92.7	156.61	98.099	156.63	95.354	205.66	52.533
162.25	92.648	156.77	98.099	156.8	95.354	205.82	52.333
162.42	92.593	156.94	98.095	156.97	95.354	205.99	52.125
162.58	92.541	157.11	98.095	157.13	95.354	206.16	51.913
162.75	92.485	157.27	98.091	157.3	95.35	206.32	51.709
162.91	92.43	157.44	98.091	157.46	95.35	206.49	51.502
163.08	92.378	157.61	98.091	157.63	95.35	206.65	51.294
163.24	92.322	157.78	98.087	157.79	95.347	206.82	51.086
163.41	92.267	157.94	98.084	157.96	95.343	206.98	50.878
163.57	92.211	158.1	98.084	158.12	95.343	207.15	50.671
163.74	92.155	158.27	98.084	158.29	95.343	207.31	50.463
163.91	92.1	158.43	98.084	158.45	95.343	207.48	50.251
164.07	92.04	158.6	98.08	158.62	95.339	207.64	50.039
164.24	91.98	158.76	98.08	158.78	95.339	207.81	49.832
164.4	91.925	158.92	98.076	158.95	95.339	207.97	49.62
164.57	91.869	159.09	98.076	159.11	95.339	208.14	49.412
164.73	91.806	159.25	98.076	159.27	95.336	208.31	49.2
164.9	91.75	159.42	98.072	159.44	95.332	208.47	48.988
165.07	91.686	159.58	98.072	159.6	95.332	208.64	48.777
165.23	91.627	159.75	98.068	159.77	95.332	208.81	48.569
165.39	91.567	159.91	98.068	159.93	95.328	208.97	48.354
165.56	91.508	160.08	98.068	160.1	95.328	209.14	48.142
165.72	91.448	160.24	98.068	160.26	95.328	209.31	47.93
165.89	91.385	160.4	98.064	160.43	95.328	209.47	47.718
166.05	91.325	160.57	98.061	160.6	95.325	209.64	47.499
166.22	91.265	160.74	98.061	160.76	95.321	209.8	47.287
166.38	91.202	160.9	98.057	160.92	95.321	209.97	47.075
166.55	91.142	161.07	98.057	161.09	95.321	210.13	46.86
166.72	91.075	161.23	98.053	161.25	95.321	210.3	46.644
166.88	91.011	161.4	98.053	161.42	95.317	210.47	46.428
167.05	90.947	161.56	98.049	161.58	95.317	210.64	46.213
167.22	90.884	161.73	98.045	161.75	95.317	210.81	45.997
167.38	90.82	161.89	98.045	161.91	95.314	210.97	45.782
167.55	90.753	162.06	98.041	162.08	95.317	211.14	45.566
167.72	90.689	162.23	98.041	162.25	95.314	211.31	45.351
167.88	90.621	162.39	98.041	162.41	95.31	211.47	45.135
168.05	90.554	162.56	98.041	162.58	95.31	211.64	44.919
168.22	90.486	162.73	98.034	162.75	95.307	211.81	44.704
168.38	90.419	162.89	98.03	162.92	95.307	211.97	44.488
168.55	90.351	163.06	98.034	163.09	95.307	212.14	44.272
168.71	90.284	163.23	98.03	163.25	95.303	212.31	44.057
168.88	90.22	163.39	98.026	163.41	95.303	212.47	43.841
169.04	90.149	163.56	98.026	163.58	95.303	212.64	43.626
169.21	90.081	163.72	98.022	163.75	95.299	212.8	43.41
169.38	90.01	163.88	98.018	163.91	95.299	212.97	43.194
169.54	89.942	164.05	98.018	164.08	95.296	213.13	42.983
169.7	89.87	164.22	98.015	164.24	95.296	213.3	42.767
169.87	89.799	164.38	98.011	164.4	95.296	213.46	42.547
170.03	89.727	164.54	98.007	164.57	95.292	213.63	42.336
170.19	89.656	164.71	98.003	164.74	95.292	213.8	42.116
170.36	89.58	164.88	98.003	164.9	95.288	213.97	41.905
170.52	89.513	165.04	97.999	165.06	95.288	214.13	41.689
170.69	89.441	165.21	97.996	165.23	95.288	214.3	41.473
170.85	89.37	165.38	97.996	165.4	95.285	214.47	41.258
171.02	89.294	165.54	97.991	165.56	95.285	214.64	41.042
171.18	89.223	165.71	97.991	165.73	95.285	214.8	40.826
171.35	89.147	165.88	97.988	165.9	95.285	214.97	40.607
171.52	89.072	166.04	97.984	166.06	95.285	215.14	40.395
171.68	88.996	166.21	97.984	166.23	95.281	215.31	40.176
171.85	88.921	166.38	97.984	166.4	95.277	215.47	39.96
172.02	88.845	166.55	97.976	166.56	95.277	215.64	39.744
172.19	88.769	166.71	97.976	166.73	95.277	215.81	39.525
172.35	88.69	166.88	97.976	166.9	95.277	215.97	39.309
172.52	88.614	167.05	97.972	167.06	95.274	216.14	39.094
172.69	88.539	167.22	97.972	167.23	95.27	216.31	38.878
172.86	88.464	167.38	97.965	167.39	95.27	216.47	38.662
173.02	88.388	167.55	97.965	167.56	95.27	216.64	38.447
173.19	88.305	167.71	97.961	167.73	95.266	216.81	38.231
173.36	88.229	167.88	97.961	167.9	95.266	216.97	38.016
173.52	88.146	168.04	97.957	168.06	95.263	217.14	37.8
173.69	88.066	168.21	97.953	168.23	95.259	217.31	37.584
173.86	87.991	168.38	97.95	168.39	95.259	217.48	37.377
174.02	87.911	168.54	97.95	168.56	95.259	217.65	37.157
174.19	87.832	168.7	97.946	168.72	95.259	217.82	36.945
174.36	87.752	168.87	97.942	168.89	95.252	217.99	36.73
174.53	87.669	169.03	97.938	169.06	95.255	218.16	36.522
174.7	87.585	169.2	97.934	169.22	95.252	218.32	36.31
174.86	87.51	169.36	97.934	169.39	95.255	218.49	36.103
175.03	87.427	169.53	97.93	169.56	95.248	218.66	35.891
175.2	87.343	169.69	97.923	169.73	95.248	218.82	35.679
175.37	87.26	169.87	97.923	169.9	95.244	218.99	35.471
175.54	87.176	170.03	97.923	170.07	95.241	219.16	35.259
175.7	87.093	170.2	97.919	170.23	95.241	219.33	35.052
175.87	87.009	170.37	97.915	170.4	95.241	219.5	34.84
176.04	86.922	170.54	97.911	170.57	95.241	219.67	34.628
176.21	86.834	170.71	97.911	170.74	95.241	219.84	34.417
176.38	86.755	170.88	97.907	170.91	95.241	220	34.201
176.55	86.668	171.05	97.904	171.08	95.237	220.17	33.989
176.71	86.58	171.22	97.9	171.25	95.237	220.35	33.778
176.88	86.496	171.38	97.896	171.42	95.233	220.51	33.562
177.04	86.409	171.56	97.896	171.59	95.233	220.68	33.35
177.21	86.326	171.72	97.896	171.76	95.233	220.85	33.135
177.38	86.238	171.9	97.892	171.93	95.233	221.02	32.919
177.54	86.151	172.07	97.884	172.1	95.226	221.19	32.704
177.71	86.063	172.24	97.884	172.27	95.226	221.36	32.484
177.88	85.972	172.41	97.88	172.44	95.223	221.53	32.261
178.05	85.885	172.58	97.88	172.61	95.223	221.69	32.041
178.21	85.797	172.75	97.877	172.78	95.219	221.86	31.818
178.38	85.71	172.92	97.873	172.95	95.215	222.03	31.602
178.55	85.618	173.08	97.869	173.12	95.219	222.2	31.378
178.72	85.527	173.25	97.865	173.29	95.219	222.37	31.155
178.89	85.439	173.42	97.857	173.46	95.215	222.53	30.932
179.06	85.348	173.58	97.857	173.62	95.215	222.7	30.708
179.22	85.261	173.75	97.854	173.79	95.212	222.87	30.489
179.39	85.169	173.91	97.854	173.96	95.215	223.04	30.265
179.56	85.074	174.08	97.846	174.13	95.212	223.21	30.041
179.73	84.986	174.25	97.842	174.3	95.208	223.37	29.814
179.9	84.895	174.41	97.842	174.47	95.208	223.54	29.587
180.06	84.8	174.58	97.838	174.64	95.208	223.7	29.363
180.23	84.708	174.75	97.834	174.81	95.208	223.87	29.14
180.4	84.617	174.92	97.831	174.97	95.208	224.03	28.916
180.57	84.517	175.09	97.827	175.14	95.204	224.19	28.693
180.74	84.426	175.26	97.823	175.31	95.204	224.36	28.477
180.9	84.335	175.43	97.819	175.48	95.204	224.52	28.258
181.07	84.239	175.59	97.815	175.65	95.197	224.69	28.042
181.24	84.148	175.76	97.811	175.81	95.201	224.85	27.827
181.4	84.057	175.93	97.808	175.98	95.197	225.01	27.623
181.57	83.961	176.1	97.811	176.14	95.194	225.18	27.423
181.74	83.866	176.27	97.804	176.31	95.197	225.34	27.231
181.9	83.77	176.44	97.804	176.48	95.19	225.51	27.05
182.07	83.675	176.61	97.796	176.65	95.186	225.67	26.89
182.24	83.58	176.78	97.792	176.82	95.186	225.84	26.748
182.41	83.484	176.95	97.789	176.99	95.186	226.01	26.623
182.58	83.389	177.12	97.785	177.16	95.183	226.18	26.529
182.74	83.293	177.28	97.781	177.33	95.183	226.35	26.454
182.91	83.198	177.45	97.773	177.5	95.183	226.52	26.399
183.08	83.099	177.62	97.773	177.66	95.183	226.69	26.357
183.25	82.999	177.79	97.769	177.83	95.183	226.87	26.325
183.42	82.904	177.95	97.765	178	95.183	227.05	26.302
183.58	82.805	178.12	97.765	178.17	95.179	227.23	26.286
183.75	82.709	178.29	97.758	178.34	95.175	227.41	26.27
183.92	82.61	178.46	97.754	178.5	95.175	227.58	26.255
184.09	82.511	178.62	97.746	178.67	95.172	227.76	26.243
184.25	82.415	178.79	97.743	178.84	95.172	227.94	26.227
184.42	82.316	178.96	97.738	179.01	95.168	228.12	26.219
184.59	82.217	179.13	97.738	179.18	95.168	228.3	26.207
184.75	82.117	179.3	97.731	179.34	95.168	228.47	26.196
184.92	82.018	179.46	97.727	179.51	95.164	228.65	26.184
185.09	81.918	179.63	97.719	179.68	95.168	228.83	26.176
185.26	81.823	179.8	97.719	179.85	95.164	229	26.164
185.43	81.724	179.97	97.712	180.02	95.161	229.18	26.157
185.59	81.624	180.14	97.708	180.19	95.161	229.36	26.145
185.76	81.521	180.31	97.704	180.36	95.161	229.53	26.137
185.93	81.422	180.47	97.704	180.53	95.157	229.71	26.125
186.1	81.322	180.64	97.697	180.7	95.157	229.88	26.113
186.27	81.223	180.81	97.693	180.87	95.153	230.06	26.102
186.44	81.12	180.97	97.689	181.04	95.153	230.23	26.094
186.61	81.016	181.14	97.685	181.21	95.15	230.4	26.082
186.78	80.913	181.31	97.681	181.38	95.15	230.58	26.074
186.94	80.818	181.47	97.673	181.55	95.146	230.75	26.062
187.11	80.71	181.64	97.666	181.71	95.146	230.92	26.051
187.28	80.611	181.81	97.666	181.88	95.146	231.1	26.043
187.45	80.512	181.97	97.658	182.05	95.142	231.27	26.031
187.62	80.409	182.14	97.654	182.22	95.142	231.44	26.015
187.78	80.309	182.31	97.654	182.38	95.142	231.61	26.008
187.95	80.206	182.48	97.647	182.55	95.142	231.78	25.992
188.12	80.102	182.65	97.643	182.72	95.139	231.94	25.98
188.29	80.003	182.82	97.639	182.88	95.142	232.11	25.968
188.46	79.904	182.99	97.635	183.05	95.139	232.28	25.961
188.63	79.804	183.16	97.627	183.22	95.135	232.45	25.945
188.79	79.701	183.33	97.624	183.39	95.131	232.63	25.937
188.96	79.598	183.49	97.62	183.55	95.131	232.79	25.921
189.13	79.495	183.66	97.612	183.72	95.128	232.96	25.914
189.3	79.395	183.83	97.608	183.89	95.124	233.13	25.898
189.47	79.292	184	97.608	184.05	95.124	233.3	25.886
189.64	79.188	184.16	97.601	184.22	95.124	233.47	25.874
189.81	79.089	184.33	97.597	184.39	95.121	233.64	25.859
189.98	78.986	184.5	97.589	184.56	95.117	233.81	25.847
190.15	78.886	184.67	97.585	184.72	95.117	233.98	25.831
190.32	78.779	184.84	97.578	184.89	95.113	234.14	25.819
190.49	78.68	185.01	97.574	185.06	95.113	234.31	25.804
190.66	78.581	185.18	97.57	185.23	95.113	234.47	25.792
190.83	78.477	185.35	97.566	185.4	95.11	234.63	25.776
191	78.374	185.52	97.555	185.56	95.106	234.8	25.765
191.17	78.275	185.68	97.555	185.73	95.106	234.97	25.749
191.33	78.171	185.85	97.547	185.9	95.106	235.13	25.733
191.51	78.072	186.02	97.543	186.07	95.102	235.3	25.717
191.68	77.968	186.19	97.539	186.23	95.102	235.46	25.702
191.84	77.865	186.36	97.528	186.4	95.099	235.63	25.686
192.01	77.762	186.52	97.528	186.57	95.099	235.8	25.67
192.18	77.662	186.69	97.52	186.74	95.099	235.96	25.655
192.35	77.563	186.86	97.516	186.9	95.095	236.13	25.639
192.51	77.46	187.03	97.509	187.07	95.095	236.29	25.623
192.68	77.361	187.19	97.505	187.24	95.095	236.46	25.608
192.85	77.257	187.36	97.501	187.41	95.095	236.63	25.588
193.03	77.158	187.53	97.493	187.57	95.095	236.79	25.572
193.2	77.058	187.69	97.486	187.74	95.091	236.96	25.553
193.37	76.959	187.85	97.482	187.91	95.088	237.13	25.537
193.54	76.86	188.02	97.474	188.08	95.088	237.29	25.518
193.71	76.764	188.19	97.47	188.25	95.084	237.46	25.494
193.88	76.665	188.35	97.466	188.41	95.084	237.63	25.474
194.05	76.569	188.52	97.459	188.58	95.08	237.79	25.455
194.22	76.474	188.68	97.451	188.74	95.08	237.96	25.435
194.39	76.375	188.85	97.451	188.91	95.077	238.12	25.412
194.56	76.275	189.02	97.444	189.08	95.073	238.28	25.388
194.74	76.184	189.18	97.44	189.25	95.073	238.44	25.369
194.9	76.085	189.35	97.432	189.41	95.069	238.61	25.345
195.07	75.989	189.52	97.424	189.58	95.069	238.77	25.322
195.25	75.894	189.69	97.42	189.75	95.066	238.93	25.298
195.42	75.799	189.85	97.417	189.93	95.066	239.1	25.274
195.59	75.703	190.02	97.413	190.1	95.062	239.26	25.247
195.76	75.612	190.19	97.409	190.27	95.062	239.43	25.22
195.93	75.513	190.36	97.401	190.44	95.062	239.59	25.192
196.1	75.421	190.53	97.398	190.61	95.058	239.76	25.165
196.27	75.326	190.7	97.39	190.78	95.058	239.93	25.133
196.45	75.234	190.87	97.382	190.94	95.055	240.09	25.102
196.62	75.143	191.04	97.374	191.11	95.055	240.26	25.075
196.79	75.051	191.2	97.371	191.28	95.051	240.42	25.043
196.96	74.96	191.37	97.363	191.45	95.051	240.59	25.012
197.13	74.865	191.54	97.355	191.62	95.047	240.75	24.98
197.3	74.769	191.71	97.352	191.79	95.047	240.92	24.945
197.47	74.678	191.88	97.344	191.96	95.044	241.08	24.918
197.64	74.591	192.05	97.34	192.12	95.044	241.25	24.882
197.82	74.499	192.21	97.329	192.29	95.04	241.41	24.847
197.99	74.408	192.38	97.321	192.46	95.04	241.57	24.808
198.16	74.324	192.55	97.317	192.63	95.037	241.74	24.773
198.33	74.233	192.72	97.309	192.8	95.037	241.9	24.737
198.5	74.146	192.88	97.302	192.97	95.037	242.07	24.698
198.67	74.058	193.06	97.298	193.13	95.033	242.23	24.655
198.84	73.971	193.22	97.29	193.3	95.033	242.4	24.616
199.01	73.887	193.39	97.29	193.47	95.029	242.56	24.573
199.18	73.804	193.56	97.283	193.64	95.026	242.72	24.533
199.35	73.716	193.73	97.279	193.81	95.026	242.88	24.49
199.52	73.629	193.9	97.271	193.98	95.022	243.04	24.443
199.69	73.545	194.07	97.267	194.15	95.022	243.2	24.396
199.86	73.462	194.23	97.259	194.31	95.018	243.36	24.349
200.03	73.379	194.41	97.252	194.48	95.018	243.53	24.302
200.2	73.295	194.58	97.248	194.65	95.015	243.69	24.251
200.37	73.212	194.75	97.24	194.81	95.015	243.85	24.2
200.54	73.124	194.92	97.233	194.98	95.011	244	24.149
200.71	73.045	195.09	97.225	195.15	95.011	244.17	24.094
200.88	72.957	195.27	97.221	195.32	95.008	244.33	24.043
201.05	72.878	195.44	97.213	195.48	95.004	244.49	23.985
201.22	72.79	195.61	97.21	195.65	95.004	244.66	23.93
201.39	72.711	195.78	97.202	195.82	95.004	244.82	23.875
201.56	72.628	195.95	97.198	195.99	94.996	244.98	23.812
201.73	72.544	196.12	97.191	196.16	94.996	245.14	23.757
201.9	72.465	196.29	97.183	196.33	94.996	245.31	23.698
202.07	72.381	196.47	97.175	196.5	94.996	245.47	23.64
202.24	72.301	196.64	97.167	196.68	94.993	245.64	23.577
202.4	72.222	196.81	97.16	196.85	94.989	245.8	23.518
202.57	72.143	196.98	97.152	197.02	94.989	245.97	23.459
202.74	72.063	197.15	97.148	197.19	94.985	246.13	23.397
202.91	71.98	197.32	97.141	197.36	94.982	246.29	23.338
203.07	71.9	197.49	97.137	197.53	94.978	246.46	23.275
203.24	71.825	197.66	97.129	197.7	94.978	246.62	23.216
203.4	71.745	197.83	97.122	197.87	94.974	246.78	23.149
203.57	71.67	197.99	97.114	198.03	94.974	246.95	23.091
203.73	71.59	198.16	97.106	198.2	94.971	247.11	23.032
203.9	71.515	198.33	97.102	198.37	94.971	247.27	22.969
204.07	71.439	198.5	97.095	198.53	94.967	247.43	22.903
204.24	71.364	198.67	97.091	198.7	94.963	247.6	22.84
204.4	71.296	198.84	97.083	198.87	94.96	247.76	22.777
204.57	71.221	199.01	97.076	199.04	94.96	247.92	22.714
204.74	71.145	199.17	97.068	199.21	94.956	248.09	22.652
204.9	71.07	199.34	97.06	199.37	94.956	248.25	22.585
205.07	70.998	199.51	97.052	199.54	94.953	248.42	22.522
205.24	70.927	199.67	97.049	199.71	94.953	248.58	22.46
205.4	70.855	199.84	97.041	199.88	94.949	248.75	22.397
205.57	70.78	200.01	97.033	200.05	94.949	248.91	22.334
205.74	70.712	200.17	97.026	200.22	94.945	249.08	22.268
205.9	70.637	200.34	97.014	200.38	94.942	249.25	22.205
206.07	70.565	200.51	97.01	200.55	94.938	249.41	22.142
206.24	70.489	200.68	97.003	200.72	94.934	249.58	22.079
206.41	70.418	200.84	96.995	200.89	94.931	249.74	22.017
206.58	70.346	201.01	96.991	201.06	94.931	249.91	21.954
206.75	70.275	201.18	96.984	201.22	94.927	250.07	21.891
206.91	70.203	201.35	96.972	201.39	94.927	250.24	21.825
207.08	70.132	201.51	96.964	201.56	94.924	250.4	21.762
207.25	70.06	201.68	96.96	201.72	94.924	250.57	21.695
207.42	69.989	201.85	96.949	201.89	94.92	250.73	21.636
207.59	69.917	202.01	96.941	202.06	94.92	250.9	21.574
207.75	69.85	202.18	96.938	202.22	94.913	251.06	21.511
207.92	69.778	202.35	96.926	202.39	94.913	251.23	21.448
208.09	69.711	202.51	96.922	202.56	94.909	251.4	21.389
208.25	69.639	202.68	96.914	202.72	94.909	251.56	21.327
208.42	69.568	202.84	96.903	202.89	94.905	251.73	21.264
208.59	69.5	203.01	96.895	203.05	94.902	251.89	21.205
208.75	69.429	203.18	96.892	203.22	94.902	252.06	21.142
208.92	69.361	203.34	96.884	203.38	94.894	252.22	21.084
209.09	69.289	203.5	96.872	203.55	94.894	252.39	21.025
209.25	69.222	203.67	96.865	203.72	94.894	252.55	20.962
209.42	69.154	203.83	96.857	203.89	94.891	252.72	20.903
209.58	69.087	204	96.849	204.06	94.887	252.89	20.844
209.75	69.019	204.16	96.842	204.22	94.883	253.05	20.782
209.92	68.948	204.33	96.834	204.39	94.883	253.22	20.727
210.08	68.876	204.49	96.823	204.56	94.88	253.39	20.668
210.25	68.813	204.66	96.819	204.73	94.876	253.56	20.617
210.41	68.741	204.82	96.807	204.9	94.876	253.73	20.558
210.58	68.673	204.99	96.8	205.06	94.872	253.9	20.503
210.75	68.606	205.16	96.792	205.23	94.869	254.07	20.448
210.91	68.538	205.33	96.784	205.39	94.869	254.24	20.394
211.08	68.471	205.5	96.777	205.56	94.865	254.41	20.343
211.25	68.403	205.66	96.769	205.72	94.865	254.57	20.295
211.41	68.332	205.83	96.761	205.89	94.861	254.74	20.245
211.58	68.268	206	96.75	206.06	94.858	254.91	20.198
211.75	68.2	206.17	96.742	206.23	94.854	255.07	20.151
211.92	68.133	206.34	96.734	206.39	94.854	255.24	20.107
212.08	68.066	206.51	96.727	206.56	94.851	255.41	20.06
212.25	67.998	206.67	96.719	206.73	94.847	255.57	20.017
212.42	67.93	206.84	96.715	206.9	94.843	255.74	19.974
212.59	67.863	207.01	96.707	207.06	94.843	255.91	19.931
212.76	67.799	207.17	96.7	207.23	94.84	256.07	19.888
212.93	67.732	207.34	96.688	207.39	94.836	256.24	19.849
213.09	67.664	207.51	96.681	207.56	94.832	256.41	19.809
213.26	67.6	207.67	96.669	207.72	94.829	256.58	19.77
213.43	67.533	207.84	96.662	207.89	94.825	256.75	19.731
213.59	67.465	208.01	96.654	208.06	94.825	256.92	19.696
213.76	67.402	208.17	96.646	208.23	94.818	257.09	19.661
213.93	67.338	208.34	96.635	208.4	94.814	257.26	19.625
214.09	67.274	208.51	96.627	208.56	94.81	257.43	19.59
214.26	67.211	208.67	96.619	208.73	94.81	257.59	19.562
214.43	67.147	208.84	96.608	208.89	94.803	257.76	19.531
214.6	67.084	209.01	96.6	209.06	94.799	257.93	19.5
214.77	67.024	209.17	96.593	209.22	94.799	258.1	19.468
214.94	66.965	209.34	96.581	209.38	94.803	258.27	19.441
215.1	66.901	209.51	96.573	209.55	94.799	258.43	19.417
215.27	66.841	209.68	96.566	209.72	94.796	258.6	19.394
215.44	66.786	209.84	96.554	209.89	94.792	258.77	19.374
215.6	66.726	210.01	96.543	210.06	94.788	258.94	19.359
215.77	66.667	210.18	96.539	210.22	94.785	259.1	19.343
215.94	66.603	210.34	96.527	210.39	94.777	259.27	19.331
216.1	66.547	210.51	96.52	210.56	94.774	259.44	19.319
216.27	66.488	210.67	96.512	210.72	94.77	259.61	19.312
216.44	66.424	210.84	96.5	210.89	94.77	259.78	19.304
216.61	66.361	211	96.493	211.06	94.767	259.95	19.3
216.77	66.301	211.17	96.481	211.23	94.763	260.12	19.288
216.93	66.242	211.34	96.474	211.4	94.759	260.29	19.28
217.1	66.186	211.5	96.466	211.57	94.752	260.46	19.272
217.27	66.126	211.67	96.455	211.74	94.748	260.63	19.265
217.43	66.066	211.84	96.447	211.91	94.745	260.8	19.257
217.6	66.011	212.01	96.439	212.07	94.741	260.97	19.249
217.77	65.955	212.18	96.432	212.24	94.738	261.14	19.241
217.93	65.896	212.35	96.42	212.41	94.734	261.31	19.233
218.1	65.836	212.52	96.413	212.58	94.73	261.48	19.225
218.27	65.78	212.69	96.401	212.75	94.73	261.64	19.221
218.43	65.725	212.86	96.389	212.91	94.727	261.81	19.213
218.6	65.665	213.02	96.382	213.08	94.719	261.98	19.206
218.76	65.61	213.19	96.374	213.25	94.716	262.14	19.198
218.93	65.55	213.36	96.363	213.42	94.712	262.31	19.186
219.09	65.494	213.53	96.359	213.59	94.708	262.48	19.178
219.26	65.435	213.69	96.347	213.76	94.705	262.64	19.171
219.42	65.383	213.86	96.336	213.93	94.697	262.81	19.163
219.59	65.331	214.03	96.324	214.1	94.694	262.98	19.155
219.76	65.28	214.2	96.32	214.27	94.69	263.15	19.143
219.93	65.228	214.36	96.313	214.43	94.69	263.32	19.135
220.09	65.18	214.53	96.301	214.6	94.686	263.49	19.127
220.26	65.125	214.7	96.29	214.77	94.679	263.65	19.119
220.43	65.077	214.86	96.278	214.94	94.675	263.82	19.112
220.6	65.025	215.03	96.271	215.1	94.672	263.99	19.1
220.76	64.978	215.2	96.263	215.27	94.668	264.16	19.092
220.93	64.922	215.36	96.247	215.44	94.664	264.32	19.084
221.09	64.87	215.53	96.24	215.61	94.657	264.49	19.076
221.26	64.815	215.69	96.225	215.78	94.654	264.66	19.069
221.42	64.763	215.86	96.217	215.95	94.65	264.83	19.061
221.59	64.707	216.02	96.206	216.11	94.646	264.99	19.053
221.75	64.656	216.19	96.198	216.28	94.639	265.16	19.041
221.92	64.608	216.36	96.19	216.45	94.639	265.33	19.033
222.09	64.557	216.52	96.179	216.62	94.628	265.49	19.025
222.26	64.509	216.69	96.171	216.79	94.621	265.66	19.018
222.42	64.453	216.85	96.16	216.96	94.617	265.83	19.006
222.59	64.405	217.02	96.148	217.12	94.613	266	19.002
222.76	64.358	217.18	96.136	217.29	94.606	266.17	18.99
222.93	64.31	217.35	96.129	217.46	94.606	266.33	18.978
223.09	64.262	217.51	96.117	217.63	94.599	266.5	18.97
223.26	64.215	217.68	96.106	217.79	94.595	266.67	18.955
223.43	64.167	217.85	96.094	217.96	94.591	266.83	18.951
223.6	64.123	218.02	96.083	218.13	94.584	267	18.943
223.77	64.075	218.19	96.075	218.3	94.58	267.17	18.931
223.93	64.032	218.35	96.064	218.47	94.577	267.33	18.923
224.1	63.984	218.53	96.052	218.63	94.57	267.5	18.912
224.27	63.936	218.69	96.041	218.8	94.566	267.66	18.908
224.44	63.893	218.86	96.033	218.97	94.562	267.82	18.892
224.6	63.849	219.03	96.021	219.13	94.555	267.99	18.884
224.77	63.805	219.2	96.006	219.3	94.551	268.15	18.872
224.93	63.762	219.37	95.999	219.46	94.548	268.31	18.861
225.1	63.714	219.54	95.987	219.63	94.541	268.48	18.853
225.26	63.67	219.71	95.975	219.8	94.537	268.64	18.841
225.43	63.631	219.88	95.964	219.96	94.529	268.8	18.833
225.6	63.587	220.06	95.956	220.13	94.526	268.97	18.825
225.76	63.543	220.23	95.941	220.29	94.522	269.13	18.814
225.93	63.503	220.4	95.933	220.45	94.518	269.29	18.798
226.09	63.46	220.58	95.926	220.62	94.507	269.46	18.79
226.26	63.416	220.74	95.91	220.78	94.504	269.62	18.778
226.42	63.372	220.91	95.899	220.95	94.5	269.78	18.77
226.59	63.332	221.09	95.887	221.11	94.497	269.95	18.759
226.76	63.293	221.25	95.872	221.28	94.489	270.11	18.747
226.93	63.249	221.42	95.861	221.44	94.478	270.27	18.735
227.09	63.209	221.59	95.853	221.61	94.475	270.43	18.723
227.26	63.166	221.75	95.845	221.77	94.471	270.6	18.708
227.43	63.126	221.92	95.834	221.94	94.464	270.76	18.7
227.59	63.09	222.09	95.822	222.1	94.46	270.92	18.688
227.76	63.046	222.26	95.811	222.27	94.46	271.08	18.676
227.93	63.011	222.43	95.799	222.44	94.453	271.24	18.665
228.1	62.971	222.59	95.788	222.6	94.442	271.4	18.653
228.27	62.931	222.76	95.776	222.77	94.438	271.56	18.641
228.43	62.895	222.93	95.765	222.94	94.431	271.73	18.633
228.6	62.856	223.1	95.757	223.1	94.427	271.89	18.622
228.77	62.82	223.26	95.742	223.27	94.42	272.05	18.61
228.93	62.78	223.43	95.73	223.44	94.416	272.22	18.598
229.1	62.74	223.6	95.719	223.61	94.409	272.38	18.582
229.26	62.705	223.76	95.707	223.77	94.405	272.55	18.571
229.43	62.669	223.93	95.696	223.94	94.398	272.71	18.559
229.6	62.629	224.09	95.684	224.1	94.391	272.88	18.547
229.76	62.593	224.26	95.669	224.27	94.384	273.04	18.535
229.93	62.562	224.43	95.657	224.43	94.376	273.21	18.524
230.09	62.522	224.59	95.642	224.6	94.369	273.37	18.512
230.26	62.49	224.76	95.634	224.76	94.365	273.54	18.496
230.42	62.454	224.92	95.623	224.93	94.358	273.7	18.484
230.59	62.414	225.09	95.611	225.09	94.354	273.87	18.469
230.75	62.383	225.25	95.6	225.25	94.347	274.03	18.457
230.92	62.347	225.42	95.588	225.42	94.34	274.19	18.441
231.08	62.315	225.58	95.577	225.58	94.329	274.35	18.429
231.25	62.279	225.75	95.565	225.74	94.325	274.51	18.414
231.41	62.252	225.92	95.554	225.91	94.318	274.67	18.402
231.58	62.216	226.08	95.539	226.07	94.31	274.83	18.39
231.74	62.18	226.25	95.527	226.23	94.303	274.99	18.375
231.91	62.148	226.42	95.512	226.39	94.296	275.15	18.363
232.07	62.116	226.58	95.5	226.56	94.289	275.31	18.347
232.23	62.085	226.75	95.489	226.72	94.285	275.47	18.335
232.4	62.053	226.91	95.473	226.88	94.278	275.63	18.324
232.56	62.021	227.08	95.466	227.05	94.271	275.79	18.308
232.72	61.989	227.24	95.45	227.21	94.26	275.95	18.296
232.88	61.957	227.4	95.439	227.37	94.252	276.12	18.28
233.05	61.926	227.57	95.423	227.54	94.245	276.28	18.265
233.21	61.902	227.73	95.412	227.7	94.241	276.44	18.253
233.38	61.87	227.9	95.397	227.87	94.234	276.61	18.237
233.54	61.842	228.06	95.385	228.03	94.223	276.76	18.222
233.7	61.814	228.22	95.374	228.2	94.219	276.93	18.206
233.87	61.786	228.38	95.358	228.37	94.212	277.09	18.19
234.03	61.755	228.55	95.347	228.53	94.205	277.25	18.175
234.2	61.723	228.71	95.335	228.69	94.197	277.41	18.163
234.36	61.695	228.87	95.32	228.86	94.187	277.57	18.147
234.53	61.663	229.04	95.309	229.03	94.179	277.73	18.131
234.69	61.636	229.2	95.293	229.19	94.176	277.88	18.116
234.86	61.604	229.37	95.282	229.36	94.168	278.05	18.1
235.02	61.576	229.53	95.266	229.52	94.161	278.21	18.084
235.19	61.548	229.69	95.255	229.69	94.15	278.37	18.069
235.35	61.516	229.86	95.24	229.85	94.143	278.52	18.053
235.52	61.489	230.02	95.224	230.02	94.139	278.69	18.037
235.68	61.461	230.18	95.213	230.18	94.124	278.84	18.022
235.85	61.433	230.35	95.201	230.34	94.124	279	18.006
236.02	61.405	230.51	95.186	230.51	94.121	279.16	17.987
236.18	61.377	230.68	95.175	230.67	94.106	279.32	17.967
236.35	61.349	230.84	95.163	230.83	94.103	279.48	17.951
236.52	61.326	231.01	95.144	231	94.088	279.64	17.936
236.69	61.302	231.17	95.136	231.16	94.081	279.81	17.916
236.85	61.274	231.34	95.125	231.32	94.074	279.97	17.9
237.02	61.25	231.5	95.109	231.49	94.066	280.13	17.881
237.19	61.222	231.67	95.098	231.65	94.055	280.3	17.869
237.36	61.198	231.84	95.082	231.82	94.048	280.46	17.853
237.52	61.171	232	95.071	231.98	94.044	280.62	17.834
237.69	61.151	232.16	95.056	232.14	94.033	280.78	17.818
237.86	61.123	232.32	95.044	232.3	94.019	280.94	17.802
238.02	61.099	232.49	95.029	232.47	94.008	281.1	17.783
238.19	61.075	232.65	95.014	232.63	94.001	281.26	17.763
238.35	61.051	232.81	95.002	232.8	93.993	281.43	17.743
238.52	61.024	232.97	94.99	232.96	93.99	281.59	17.728
238.68	61.004	233.13	94.975	233.12	93.979	281.75	17.708
238.85	60.98	233.29	94.964	233.29	93.968	281.91	17.688
239.01	60.956	233.46	94.948	233.45	93.96	282.07	17.669
239.18	60.932	233.62	94.933	233.62	93.953	282.24	17.653
239.35	60.908	233.78	94.922	233.78	93.946	282.4	17.634
239.51	60.884	233.95	94.91	233.95	93.931	282.56	17.614
239.68	60.865	234.11	94.895	234.11	93.924	282.72	17.594
239.84	60.841	234.27	94.879	234.28	93.913	282.88	17.575
240.01	60.817	234.44	94.864	234.44	93.906	283.05	17.559
240.17	60.797	234.6	94.849	234.61	93.895	283.21	17.536
240.34	60.773	234.77	94.837	234.78	93.884	283.37	17.516
240.5	60.749	234.93	94.822	234.95	93.876	283.53	17.5
240.67	60.726	235.1	94.81	235.12	93.865	283.69	17.481
240.84	60.706	235.26	94.799	235.28	93.854	283.85	17.457
241	60.686	235.43	94.783	235.45	93.847	284.01	17.442
241.17	60.666	235.59	94.772	235.62	93.836	284.17	17.422
241.33	60.642	235.75	94.757	235.79	93.825	284.33	17.398
241.5	60.618	235.92	94.737	235.95	93.815	284.49	17.383
241.66	60.594	236.08	94.73	236.12	93.804	284.65	17.359
241.83	60.578	236.25	94.715	236.28	93.796	284.81	17.34
241.99	60.559	236.41	94.699	236.45	93.785	284.97	17.316
242.15	60.535	236.57	94.68	236.62	93.778	285.13	17.297
242.32	60.519	236.74	94.669	236.79	93.767	285.29	17.273
242.48	60.495	236.9	94.653	236.95	93.756	285.45	17.253
242.65	60.479	237.06	94.642	237.12	93.745	285.62	17.23
242.82	60.459	237.22	94.623	237.29	93.734	285.78	17.21
242.98	60.439	237.38	94.611	237.45	93.723	285.94	17.187
243.15	60.42	237.55	94.596	237.62	93.712	286.1	17.163
243.32	60.4	237.71	94.58	237.79	93.705	286.26	17.14
243.48	60.38	237.87	94.565	237.95	93.694	286.42	17.116
243.65	60.36	238.04	94.554	238.12	93.683	286.58	17.097
243.82	60.34	238.2	94.538	238.28	93.676	286.74	17.073
243.98	60.32	238.36	94.527	238.45	93.665	286.9	17.05
244.15	60.3	238.52	94.511	238.62	93.654	287.06	17.026
244.32	60.28	238.68	94.496	238.78	93.643	287.22	17.002
244.49	60.261	238.85	94.481	238.95	93.632	287.38	16.975
244.66	60.241	239.01	94.465	239.11	93.625	287.54	16.955
244.82	60.225	239.17	94.454	239.28	93.614	287.7	16.932
244.99	60.205	239.34	94.438	239.44	93.603	287.86	16.908
245.16	60.185	239.5	94.427	239.61	93.592	288.02	16.881
245.32	60.165	239.66	94.412	239.78	93.577	288.18	16.857
245.49	60.149	239.83	94.396	239.95	93.57	288.34	16.83
245.66	60.129	240	94.381	240.11	93.559	288.5	16.807
245.82	60.11	240.17	94.37	240.28	93.548	288.66	16.783
245.99	60.094	240.33	94.35	240.45	93.537	288.82	16.755
246.16	60.074	240.5	94.335	240.62	93.526	288.98	16.732
246.32	60.054	240.67	94.323	240.79	93.515	289.14	16.701
246.49	60.034	240.83	94.308	240.96	93.504	289.3	16.677
246.65	60.014	241	94.289	241.12	93.493	289.46	16.65
246.82	60.002	241.16	94.277	241.29	93.482	289.62	16.626
246.98	59.979	241.33	94.262	241.45	93.471	289.78	16.599
247.15	59.962	241.49	94.251	241.62	93.457	289.94	16.571
247.31	59.947	241.66	94.231	241.78	93.446	290.1	16.544
247.48	59.931	241.83	94.22	241.95	93.435	290.26	16.512
247.64	59.915	242	94.201	242.12	93.42	290.42	16.489
247.81	59.895	242.16	94.189	242.28	93.413	290.59	16.461
247.98	59.879	242.33	94.174	242.45	93.406	290.75	16.434
248.15	59.863	242.49	94.159	242.62	93.387	290.91	16.403
248.31	59.843	242.66	94.143	242.79	93.38	291.07	16.375
248.48	59.828	242.82	94.132	242.96	93.366	291.23	16.348
248.64	59.807	242.99	94.117	243.13	93.355	291.39	16.32
248.81	59.788	243.15	94.101	243.29	93.34	291.55	16.297
248.97	59.78	243.32	94.09	243.46	93.329	291.71	16.265
249.14	59.764	243.48	94.074	243.63	93.322	291.87	16.238
249.31	59.744	243.65	94.055	243.79	93.307	292.03	16.211
249.47	59.724	243.81	94.04	243.96	93.3	292.19	16.183
249.64	59.708	243.98	94.021	244.13	93.289	292.35	16.152
249.8	59.692	244.15	94.009	244.29	93.271	292.51	16.124
249.97	59.676	244.31	93.994	244.46	93.26	292.67	16.093
250.13	59.657	244.48	93.975	244.63	93.249	292.83	16.062
250.3	59.641	244.65	93.963	244.79	93.234	292.99	16.034
250.47	59.625	244.82	93.948	244.96	93.22	293.15	15.999
250.63	59.609	244.99	93.932	245.12	93.212	293.32	15.971
250.8	59.593	245.15	93.917	245.29	93.198	293.48	15.94
250.97	59.573	245.32	93.902	245.46	93.187	293.63	15.909
251.14	59.557	245.49	93.887	245.62	93.176	293.8	15.877
251.3	59.545	245.66	93.875	245.79	93.162	293.96	15.846
251.47	59.525	245.83	93.856	245.95	93.151	294.12	15.815
251.63	59.509	245.99	93.841	246.12	93.136	294.28	15.783
251.8	59.494	246.16	93.829	246.28	93.121	294.44	15.752
251.96	59.478	246.33	93.81	246.45	93.11	294.6	15.713
252.13	59.458	246.5	93.795	246.61	93.096	294.76	15.681
252.3	59.446	246.66	93.779	246.78	93.085	294.92	15.646
252.47	59.43	246.83	93.76	246.95	93.07	295.08	15.615
252.63	59.41	247	93.745	247.12	93.059	295.24	15.579
252.8	59.394	247.17	93.73	247.28	93.045	295.4	15.548
252.97	59.378	247.33	93.714	247.45	93.034	295.57	15.513
253.13	59.363	247.5	93.695	247.62	93.019	295.73	15.477
253.3	59.347	247.67	93.68	247.78	93.004	295.89	15.442
253.47	59.331	247.83	93.668	247.95	92.994	296.05	15.407
253.63	59.319	248	93.649	248.12	92.983	296.21	15.376
253.8	59.299	248.17	93.634	248.28	92.968	296.37	15.336
253.97	59.283	248.34	93.618	248.45	92.953	296.53	15.301
254.13	59.267	248.5	93.603	248.62	92.942	296.7	15.266
254.3	59.251	248.67	93.584	248.78	92.924	296.86	15.23
254.47	59.235	248.84	93.572	248.95	92.913	297.02	15.195
254.63	59.223	249	93.557	249.11	92.899	297.19	15.16
254.8	59.203	249.17	93.538	249.28	92.884	297.35	15.121
254.97	59.184	249.34	93.519	249.45	92.87	297.51	15.086
255.14	59.172	249.51	93.507	249.62	92.859	297.67	15.046
255.3	59.152	249.68	93.492	249.78	92.848	297.84	15.011
255.47	59.136	249.84	93.473	249.95	92.829	298	14.972
255.64	59.12	250.01	93.457	250.12	92.811	298.16	14.933
255.8	59.104	250.18	93.442	250.28	92.797	298.32	14.893
255.97	59.084	250.35	93.423	250.45	92.786	298.48	14.854
256.13	59.072	250.52	93.407	250.62	92.771	298.64	14.815
256.3	59.053	250.68	93.388	250.78	92.756	298.8	14.78
256.46	59.037	250.85	93.373	250.95	92.742	298.96	14.74
256.63	59.017	251.02	93.354	251.11	92.727	299.12	14.697
256.79	59.001	251.19	93.338	251.28	92.716	299.28	14.658
256.96	58.985	251.35	93.323	251.44	92.698	299.44	14.619
257.13	58.965	251.52	93.308	251.61	92.684	299.6	14.58
257.29	58.949	251.69	93.292	251.77	92.665	299.76	14.537
257.46	58.933	251.85	93.273	251.94	92.654	299.91	14.497
257.62	58.917	252.02	93.254	252.1	92.636	300.07	14.458
257.79	58.902	252.19	93.239	252.27	92.625	300.24	14.419
257.95	58.882	252.35	93.224	252.43	92.611	300.39	14.376
258.12	58.862	252.52	93.204	252.6	92.596	300.56	14.329
258.29	58.846	252.68	93.189	252.76	92.581	300.72	14.29
258.46	58.83	252.85	93.174	252.93	92.563	300.88	14.25
258.63	58.814	253.01	93.158	253.09	92.548	301.04	14.203
258.79	58.798	253.18	93.139	253.26	92.534	301.2	14.16
258.96	58.778	253.34	93.12	253.42	92.519	301.37	14.117
259.13	58.759	253.51	93.105	253.59	92.501	301.53	14.074
259.29	58.743	253.67	93.085	253.75	92.486	301.69	14.031
259.46	58.723	253.84	93.07	253.92	92.468	301.85	13.988
259.62	58.707	254	93.055	254.08	92.45	302.01	13.945
259.79	58.687	254.17	93.036	254.25	92.435	302.18	13.898
259.95	58.675	254.34	93.017	254.41	92.417	302.34	13.854
260.12	58.655	254.5	93.001	254.58	92.399	302.5	13.811
260.29	58.639	254.67	92.986	254.75	92.388	302.66	13.764
260.45	58.623	254.83	92.967	254.91	92.37	302.82	13.717
260.62	58.607	255	92.947	255.08	92.351	302.98	13.67
260.79	58.588	255.17	92.932	255.24	92.333	303.14	13.623
260.95	58.572	255.33	92.913	255.41	92.319	303.3	13.576
261.12	58.556	255.5	92.894	255.57	92.3	303.46	13.529
261.29	58.536	255.67	92.879	255.74	92.282	303.63	13.482
261.45	58.52	255.84	92.859	255.9	92.268	303.79	13.439
261.62	58.504	256	92.84	256.07	92.249	303.95	13.388
261.79	58.488	256.17	92.821	256.24	92.235	304.12	13.341
261.95	58.468	256.34	92.806	256.4	92.216	304.28	13.294
262.12	58.449	256.5	92.786	256.57	92.198	304.44	13.251
262.29	58.429	256.67	92.767	256.74	92.184	304.61	13.204
262.45	58.409	256.84	92.748	256.9	92.162	304.77	13.149
262.62	58.393	257	92.733	257.07	92.144	304.94	13.098
262.79	58.377	257.16	92.714	257.24	92.129	305.1	13.051
262.96	58.357	257.32	92.694	257.4	92.107	305.26	13
263.13	58.341	257.49	92.679	257.57	92.092	305.43	12.953
263.3	58.321	257.65	92.66	257.73	92.071	305.59	12.902
263.47	58.301	257.82	92.641	257.9	92.056	305.75	12.851
263.63	58.282	257.98	92.622	258.07	92.034	305.91	12.8
263.8	58.266	258.15	92.599	258.23	92.016	306.07	12.749
263.97	58.246	258.32	92.583	258.39	91.998	306.24	12.702
264.13	58.23	258.48	92.564	258.56	91.979	306.4	12.647
264.3	58.21	258.65	92.545	258.73	91.961	306.56	12.6
264.47	58.194	258.81	92.53	258.89	91.943	306.72	12.549
264.63	58.174	258.97	92.511	259.06	91.925	306.89	12.498
264.8	58.155	259.13	92.491	259.23	91.903	307.05	12.447
264.96	58.134	259.3	92.468	259.39	91.885	307.21	12.396
265.13	58.111	259.46	92.453	259.56	91.866	307.37	12.345
265.3	58.095	259.63	92.43	259.73	91.848	307.53	12.298
265.47	58.075	259.79	92.411	259.9	91.83	307.69	12.243
265.63	58.055	259.95	92.392	260.06	91.808	307.85	12.192
265.8	58.035	260.12	92.373	260.23	91.79	308.01	12.141
265.97	58.015	260.28	92.353	260.39	91.768	308.17	12.09
266.13	58	260.44	92.33	260.56	91.746	308.33	12.035
266.3	57.976	260.61	92.315	260.72	91.731	308.49	11.98
266.47	57.956	260.77	92.296	260.89	91.709	308.65	11.926
266.63	57.936	260.94	92.277	261.05	91.688	308.81	11.871
266.8	57.912	261.11	92.25	261.21	91.666	308.97	11.816
266.97	57.896	261.27	92.231	261.37	91.647	309.13	11.761
267.13	57.876	261.44	92.212	261.54	91.625	309.3	11.71
267.3	57.852	261.61	92.189	261.7	91.604	309.46	11.655
267.47	57.833	261.78	92.169	261.87	91.582	309.62	11.6
267.64	57.813	261.94	92.15	262.04	91.56	309.79	11.545
267.81	57.789	262.11	92.131	262.2	91.541	309.95	11.49
267.97	57.765	262.27	92.108	262.37	91.52	310.11	11.432
268.14	57.745	262.44	92.089	262.53	91.498	310.28	11.373
268.3	57.721	262.61	92.066	262.7	91.476	310.45	11.318
268.47	57.701	262.78	92.047	262.87	91.454	310.61	11.263
268.64	57.682	262.94	92.028	263.03	91.432	310.78	11.204
268.81	57.658	263.11	92.005	263.2	91.41	310.95	11.145
268.98	57.638	263.28	91.986	263.36	91.388	311.12	11.087
269.14	57.614	263.45	91.962	263.53	91.366	311.28	11.028
269.31	57.594	263.62	91.94	263.69	91.345	311.45	10.969
269.48	57.57	263.78	91.92	263.86	91.319	311.61	10.914
269.64	57.55	263.95	91.897	264.02	91.297	311.78	10.855
269.81	57.53	264.12	91.874	264.19	91.275	311.94	10.793
269.98	57.511	264.29	91.851	264.36	91.253	312.11	10.734
270.15	57.487	264.45	91.832	264.52	91.232	312.28	10.675
270.31	57.467	264.62	91.809	264.69	91.206	312.44	10.612
270.48	57.443	264.78	91.786	264.85	91.184	312.61	10.549
270.65	57.423	264.95	91.763	265.02	91.158	312.77	10.491
270.81	57.399	265.12	91.74	265.18	91.133	312.93	10.428
270.98	57.379	265.29	91.717	265.35	91.107	313.1	10.365
271.15	57.356	265.45	91.694	265.51	91.085	313.26	10.303
271.32	57.336	265.62	91.675	265.67	91.064	313.43	10.24
271.48	57.312	265.78	91.652	265.84	91.042	313.6	10.177
271.65	57.292	265.95	91.629	266.01	91.016	313.76	10.114
271.82	57.268	266.12	91.606	266.17	90.991	313.93	10.052
271.99	57.244	266.28	91.583	266.34	90.969	314.1	9.989
272.15	57.221	266.45	91.56	266.5	90.94	314.26	9.922
272.32	57.197	266.61	91.533	266.67	90.918	314.43	9.86
272.49	57.173	266.78	91.51	266.83	90.892	314.6	9.793
272.65	57.149	266.95	91.491	267	90.867	314.76	9.726
272.82	57.125	267.12	91.464	267.17	90.841	314.93	9.664
272.99	57.101	267.28	91.441	267.33	90.815	315.1	9.597
273.16	57.074	267.45	91.414	267.5	90.794	315.26	9.53
273.32	57.05	267.62	91.391	267.66	90.765	315.43	9.464
273.49	57.03	267.79	91.365	267.83	90.739	315.6	9.397
273.66	57.006	267.96	91.338	267.99	90.71	315.77	9.331
273.83	56.982	268.13	91.315	268.16	90.688	315.94	9.264
274	56.954	268.3	91.288	268.32	90.662	316.11	9.197
274.17	56.93	268.47	91.261	268.49	90.637	316.28	9.126
274.33	56.907	268.63	91.238	268.66	90.608	316.44	9.056
274.5	56.883	268.8	91.215	268.82	90.579	316.61	8.985
274.67	56.855	268.97	91.192	268.99	90.553	316.78	8.919
274.84	56.831	269.14	91.165	269.16	90.524	316.94	8.852
275.01	56.807	269.31	91.142	269.32	90.498	317.11	8.782
275.18	56.775	269.47	91.115	269.49	90.473	317.28	8.715
275.35	56.752	269.64	91.089	269.65	90.443	317.44	8.648
275.52	56.724	269.81	91.062	269.82	90.414	317.61	8.57
275.69	56.696	269.98	91.039	269.98	90.389	317.78	8.499
275.86	56.672	270.14	91.012	270.15	90.359	317.95	8.433
276.02	56.644	270.31	90.985	270.31	90.334	318.11	8.358
276.19	56.62	270.48	90.958	270.48	90.305	318.28	8.288
276.36	56.585	270.64	90.931	270.64	90.276	318.45	8.213
276.53	56.561	270.81	90.908	270.81	90.246	318.61	8.143
276.7	56.533	270.98	90.878	270.98	90.217	318.78	8.068
276.87	56.505	271.15	90.851	271.14	90.192	318.95	7.997
277.03	56.477	271.31	90.824	271.31	90.162	319.11	7.923
277.2	56.45	271.48	90.797	271.48	90.133	319.28	7.853
277.37	56.422	271.65	90.77	271.64	90.104	319.45	7.778
277.54	56.394	271.82	90.743	271.81	90.075	319.62	7.703
277.7	56.366	271.99	90.717	271.98	90.046	319.79	7.629
277.87	56.338	272.15	90.686	272.15	90.017	319.95	7.551
278.04	56.307	272.31	90.659	272.32	89.984	320.12	7.476
278.21	56.279	272.48	90.632	272.49	89.955	320.29	7.405
278.38	56.251	272.64	90.602	272.66	89.922	320.45	7.327
278.54	56.223	272.81	90.575	272.82	89.892	320.62	7.249
278.71	56.191	272.98	90.544	272.99	89.86	320.79	7.178
278.88	56.164	273.14	90.514	273.16	89.831	320.96	7.1
279.04	56.132	273.31	90.487	273.33	89.798	321.12	7.025
279.21	56.1	273.47	90.456	273.5	89.769	321.29	6.951
279.37	56.068	273.63	90.429	273.66	89.736	321.46	6.872
279.54	56.036	273.8	90.403	273.83	89.706	321.62	6.798
279.7	56.005	273.96	90.372	274	89.677	321.79	6.719
279.87	55.977	274.13	90.341	274.17	89.645	321.96	6.641
280.03	55.945	274.29	90.314	274.34	89.612	322.13	6.566
280.2	55.913	274.46	90.288	274.51	89.579	322.29	6.488
280.36	55.881	274.62	90.253	274.68	89.546	322.46	6.41
280.53	55.854	274.79	90.226	274.85	89.513	322.62	6.335
280.7	55.818	274.96	90.196	275.02	89.48	322.79	6.257
280.86	55.786	275.12	90.161	275.19	89.451	322.95	6.178
281.03	55.75	275.29	90.134	275.36	89.418	323.12	6.104
281.2	55.718	275.45	90.1	275.52	89.386	323.29	6.026
281.36	55.683	275.62	90.073	275.69	89.353	323.45	5.951
281.53	55.651	275.79	90.042	275.86	89.32	323.62	5.873
281.69	55.619	275.96	90.008	276.03	89.283	323.78	5.794
281.86	55.583	276.13	89.977	276.2	89.25	323.95	5.72
282.02	55.551	276.3	89.946	276.37	89.218	324.12	5.637
282.18	55.52	276.47	89.912	276.54	89.178	324.29	5.559
282.35	55.488	276.64	89.885	276.71	89.145	324.46	5.484
282.51	55.456	276.81	89.854	276.88	89.112	324.63	5.41
282.68	55.424	276.98	89.82	277.05	89.075	324.8	5.332
282.84	55.393	277.15	89.789	277.22	89.042	324.97	5.253
283.01	55.357	277.32	89.755	277.39	89.01	325.13	5.175
283.17	55.317	277.49	89.724	277.56	88.973	325.3	5.1
283.33	55.285	277.66	89.69	277.73	88.937	325.47	5.022
283.5	55.25	277.83	89.659	277.9	88.897	325.64	4.947
283.66	55.21	278	89.624	278.06	88.864	325.81	4.873
283.82	55.178	278.17	89.594	278.23	88.824	325.98	4.798
283.99	55.138	278.34	89.559	278.4	88.787	326.15	4.724
284.16	55.102	278.5	89.525	278.57	88.751	326.32	4.65
284.32	55.067	278.67	89.486	278.73	88.718	326.48	4.571
284.49	55.035	278.83	89.456	278.89	88.681	326.65	4.501
284.65	54.999	279	89.421	279.06	88.645	326.82	4.426
284.82	54.959	279.16	89.383	279.22	88.608	326.99	4.352
284.98	54.924	279.33	89.348	279.38	88.572	327.16	4.277
285.15	54.888	279.49	89.314	279.55	88.532	327.33	4.207
285.31	54.848	279.66	89.279	279.71	88.499	327.5	4.136
285.47	54.808	279.82	89.249	279.88	88.455	327.67	4.065
285.63	54.773	279.99	89.214	280.04	88.415	327.83	3.995
285.8	54.737	280.15	89.176	280.21	88.379	328	3.924
285.96	54.697	280.32	89.141	280.38	88.342	328.17	3.858
286.12	54.661	280.48	89.107	280.54	88.305	328.34	3.791
286.29	54.622	280.65	89.069	280.71	88.266	328.51	3.728
286.45	54.582	280.82	89.034	280.87	88.225	328.67	3.662
286.62	54.538	280.99	88.996	281.04	88.189	328.84	3.603
286.78	54.494	281.16	88.958	281.21	88.152	329	3.54
286.94	54.451	281.33	88.923	281.37	88.109	329.17	3.481
287.11	54.407	281.49	88.888	281.54	88.069	329.33	3.43
287.27	54.363	281.66	88.85	281.7	88.032	329.5	3.383
287.43	54.324	281.83	88.816	281.87	87.992	329.66	3.336
287.59	54.28	282	88.781	282.03	87.952	329.83	3.293
287.76	54.244	282.17	88.739	282.2	87.915	329.99	3.254
287.92	54.204	282.33	88.705	282.36	87.875	330.16	3.215
288.09	54.161	282.5	88.67	282.53	87.839	330.33	3.179
288.25	54.121	282.67	88.632	282.69	87.799	330.5	3.148
288.42	54.077	282.83	88.593	282.86	87.758	330.66	3.12
288.58	54.033	283	88.555	283.03	87.718	330.83	3.113
288.74	53.99	283.16	88.52	283.2	87.682	331	3.101
288.91	53.95	283.33	88.478	283.36	87.642	331.17	3.093
289.07	53.91	283.49	88.44	283.53	87.602	331.34	3.089
289.24	53.866	283.66	88.406	283.69	87.565	331.5	3.085
289.41	53.823	283.82	88.363	283.86	87.529	331.67	3.078
289.58	53.783	283.99	88.329	284.02	87.488	331.84	3.073
289.74	53.739	284.15	88.291	284.18	87.448	332.01	3.07
289.91	53.696	284.32	88.252	284.35	87.408	332.17	3.07
290.08	53.652	284.48	88.21	284.51	87.372	332.34	3.066
290.25	53.608	284.64	88.176	284.68	87.335	332.51	3.058
290.41	53.56	284.81	88.133	284.84	87.299	332.67	3.058
290.58	53.517	284.98	88.095	285	87.259	332.84	3.058
290.75	53.473	285.14	88.053	285.17	87.222	333	3.054
290.91	53.426	285.31	88.014	285.33	87.189	333.17	3.05
291.08	53.382	285.48	87.973	285.5	87.149	333.33	3.046
291.24	53.334	285.65	87.934	285.67	87.112	333.5	3.042
291.41	53.282	285.81	87.892	285.83	87.08	333.67	3.038
291.57	53.235	285.98	87.85	286	87.04	333.84	3.034
291.74	53.191	286.14	87.808	286.16	87.003	334.01	3.031
291.91	53.143	286.31	87.766	286.33	86.967	334.18	3.026
292.07	53.092	286.47	87.723	286.49	86.93	334.34	3.023
292.24	53.048	286.63	87.681	286.66	86.897	334.51	3.019
292.4	53	286.8	87.643	286.82	86.865	334.68	3.011
292.57	52.953	286.96	87.601	286.99	86.828	334.84	3.011
292.73	52.909	287.12	87.559	287.16	86.792	335.01	3.003
292.9	52.861	287.28	87.516	287.32	86.755	335.18	2.999
293.07	52.813	287.45	87.474	287.49	86.719	335.35	2.995
293.24	52.766	287.61	87.432	287.65	86.686	335.51	2.991
293.4	52.718	287.77	87.394	287.82	86.649	335.68	2.987
293.57	52.667	287.94	87.348	287.99	86.616	335.84	2.987
293.74	52.619	288.1	87.302	288.15	86.58	336.01	2.983
293.9	52.571	288.27	87.26	288.32	86.543	336.18	2.976
294.07	52.519	288.43	87.217	288.49	86.507	336.34	2.972
294.23	52.468	288.6	87.175	288.65	86.47	336.51	2.968
294.4	52.416	288.76	87.133	288.82	86.438	336.67	2.964
294.57	52.368	288.93	87.091	288.98	86.401	336.84	2.96
294.73	52.317	289.09	87.045	289.15	86.365	337	2.956
294.9	52.265	289.26	87.003	289.32	86.328	337.17	2.952
295.07	52.213	289.43	86.957	289.48	86.292	337.33	2.952
295.23	52.162	289.59	86.911	289.65	86.259	337.5	2.948
295.4	52.11	289.76	86.869	289.81	86.219	337.66	2.944
295.57	52.058	289.93	86.823	289.98	86.182	337.83	2.94
295.73	52.011	290.09	86.78	290.15	86.146	337.99	2.936
295.9	51.959	290.26	86.735	290.31	86.102	338.15	2.932
296.07	51.908	290.43	86.689	290.48	86.062	338.32	2.929
296.23	51.856	290.59	86.642	290.65	86.025	338.48	2.925
296.4	51.808	290.76	86.596	290.81	85.982	338.65	2.925
296.56	51.756	290.92	86.55	290.98	85.942	338.81	2.921
296.73	51.705	291.09	86.504	291.15	85.901	338.98	2.921
296.9	51.653	291.26	86.458	291.32	85.858	339.14	2.917
297.06	51.601	291.43	86.412	291.48	85.814	339.31	2.913
297.23	51.55	291.6	86.366	291.65	85.77	339.48	2.909
297.4	51.498	291.77	86.317	291.82	85.726	339.64	2.905
297.57	51.446	291.94	86.275	291.98	85.683	339.81	2.905
297.73	51.387	292.11	86.225	292.15	85.635	339.97	2.901
297.9	51.335	292.28	86.175	292.31	85.591	340.13	2.897
298.07	51.28	292.44	86.129	292.48	85.544	340.3	2.897
298.23	51.228	292.61	86.079	292.64	85.5	340.46	2.889
298.4	51.176	292.78	86.029	292.8	85.453	340.63	2.889
298.56	51.121	292.94	85.983	292.96	85.409	340.79	2.885
298.73	51.065	293.11	85.937	293.13	85.361	340.96	2.885
298.9	51.013	293.28	85.887	293.29	85.314	341.12	2.881
299.07	50.961	293.45	85.837	293.46	85.266	341.29	2.877
299.23	50.902	293.62	85.788	293.63	85.219	341.45	2.874
299.39	50.846	293.78	85.738	293.79	85.168	341.61	2.87
299.56	50.791	293.95	85.692	293.96	85.121	341.78	2.87
299.73	50.739	294.12	85.638	294.12	85.066	341.94	2.866
299.89	50.683	294.29	85.592	294.29	85.019	342.11	2.862
300.06	50.628	294.45	85.542	294.45	84.964	342.28	2.858
300.22	50.572	294.62	85.489	294.62	84.913	342.44	2.854
300.38	50.517	294.79	85.439	294.79	84.854	342.61	2.854
300.54	50.461	294.95	85.385	294.95	84.799	342.78	2.85
300.71	50.401	295.12	85.335	295.12	84.741	342.94	2.846
300.87	50.346	295.28	85.282	295.28	84.687	343.11	2.842
301.04	50.286	295.45	85.232	295.44	84.632	343.27	2.834
301.2	50.23	295.61	85.182	295.61	84.574	343.44	2.834
301.36	50.167	295.78	85.132	295.77	84.519	343.6	2.83
301.52	50.111	295.95	85.082	295.94	84.46	343.76	2.83
301.69	50.052	296.12	85.033	296.1	84.402	343.93	2.823
301.85	49.988	296.28	84.975	296.27	84.34	344.1	2.823
302.01	49.929	296.45	84.921	296.43	84.274	344.26	2.819
302.18	49.865	296.62	84.872	296.59	84.216	344.43	2.819
302.34	49.805	296.78	84.818	296.76	84.154	344.59	2.815
302.5	49.746	296.95	84.76	296.92	84.092	344.76	2.811
302.66	49.686	297.11	84.707	297.09	84.03	344.93	2.807
302.83	49.63	297.28	84.653	297.25	83.964	345.09	2.803
302.99	49.571	297.44	84.596	297.41	83.902	345.26	2.799
303.15	49.511	297.61	84.542	297.57	83.837	345.42	2.795
303.32	49.452	297.77	84.485	297.73	83.771	345.59	2.795
303.48	49.392	297.94	84.427	297.89	83.705	345.75	2.787
303.64	49.332	298.1	84.369	298.06	83.64	345.92	2.783
303.81	49.273	298.26	84.312	298.22	83.57	346.09	2.779
303.97	49.213	298.43	84.251	298.38	83.504	346.25	2.776
304.13	49.153	298.59	84.197	298.54	83.435	346.42	2.772
304.3	49.094	298.75	84.136	298.7	83.37	346.58	2.768
304.46	49.038	298.92	84.078	298.87	83.297	346.75	2.764
304.63	48.979	299.08	84.021	299.03	83.227	346.92	2.76
304.79	48.915	299.24	83.963	299.19	83.158	347.09	2.756
304.95	48.855	299.41	83.902	299.36	83.089	347.26	2.752
305.11	48.792	299.57	83.841	299.52	83.016	347.42	2.748
305.27	48.732	299.73	83.783	299.69	82.946	347.59	2.744
305.44	48.673	299.9	83.722	299.85	82.87	347.75	2.74
305.6	48.609	300.06	83.664	300.01	82.797	347.92	2.736
305.76	48.549	300.22	83.603	300.18	82.724	348.08	2.732
305.92	48.486	300.39	83.542	300.34	82.647	348.25	2.729
306.08	48.422	300.55	83.484	300.5	82.574	348.41	2.724
306.25	48.363	300.72	83.419	300.67	82.497	348.58	2.721
306.41	48.295	300.88	83.361	300.83	82.421	348.74	2.717
306.57	48.232	301.05	83.296	300.99	82.344	348.91	2.713
306.74	48.176	301.21	83.235	301.15	82.268	349.07	2.713
306.9	48.108	301.38	83.174	301.31	82.187	349.24	2.705
307.06	48.049	301.54	83.109	301.47	82.111	349.4	2.705
307.23	47.985	301.71	83.047	301.64	82.027	349.57	2.701
307.39	47.922	301.87	82.978	301.8	81.947	349.74	2.693
307.56	47.854	302.04	82.917	301.96	81.866	349.9	2.693
307.72	47.795	302.2	82.856	302.13	81.783	350.07	2.685
307.89	47.727	302.37	82.787	302.29	81.695	350.23	2.682
308.05	47.663	302.53	82.725	302.45	81.615	350.4	2.677
308.22	47.6	302.69	82.66	302.62	81.534	350.56	2.674
308.38	47.532	302.86	82.591	302.78	81.443	350.73	2.67
[truncated: 3,253 more rows]
